# Supplementary material for: Recent European origin of azole resistance in the critical priority fungal pathogen Aspergillus fumigatus
Source: Research Square preprint supplement (doi:10.21203/rs.3.rs-7905776/v1), 2025-11-13
Supplement: Supplementary file 1 [file 7cafad980a6bcd2fa051829d.xlsx]

## Sheet: Sheet1
Supermater control crosses*	REP1	REP2	REP3	Cluster cross
E81 x E83 (47-51 x 47-55)	203	155	132	3 x 5
E81 x E121 (47-51 x 47-190)	68	111	43	3 x 4
E113 x E83 (47-169 x 47-55)	83	186	120	4 x 5
E113 x E121 (47-169 x 47-190)	170	131	38	4 x 4
Supermater x azole sensitive
E81 x C221 (47-51 x 47-52)	54	41	155	3 x 3
E81 x C246 (47-51 x 47-154)	31	38	45	3 x 3
E81 x C603 (47-51 x IGF11997)	13	23	19	3 x 5
E81 x E62 (47-51 x C201)	82	16	100	3 x 3
E113 x E82 (47-169 x 47-52)	64	8	0	4 x 3
E113 x E107 (47-169 x 47-154)	5	11	0	4 x 3
E113 x C603 (47-169 x IGF11997)	112	76	52	4 x 5
E113 x E62 (47-169 x C201)	18	9	30	4 x 3
E83 x C40 (47-55 x C38)	85	93	46	5 x 3
E83 x E84 (47-55 x 47-59)	88	97	82	5 x 3
E83 x E58 (47-55 x C196)	4	0	0	5 x 3
E121 x C40 (47-190 x C38)	30	31	22	4 x 3
E121 x E84 (47-190 x 47-59)	24	29	16	4 x 3
E121 x E58 (47-190 x C196)	0	0	0	4 x 3
Supermater x azole resistant TR34
E81 x E14 (47-51 x C6)	61	7	9	3 x 1
E81 x E15 (47-51 x C7)	19	47	25	3 x 3
E81 x E32 (47-51 x C25)	42	32	13	3 x 3
E81 x E36 (47-51 x C29)	36	11	30	3 x 3
E81 x E16 (47-51 x C8)	113	89	43	3 x 2
E81 x E18 (47-51 x C12)	0	0	0	3 x 3
E81 x E23 (47-51 x C16)	29	15	32	3 x 2
E81 x C85 (47-51 x C103)	13	21	0	3 x 2
E81 x E205 (47-51 x C368)	15	2	61	3 x 2
E81 x E25 (47-51 x C18)	16	31	22	3 x 2
E113 x E14 (47-169 x C6)	10	20	15	4 x 1
E113 x E15 (47-169 x C7)	7	3	141	4 x 3
E113 x E32 (47-169 x C25)	6	39	28	4 x 3
E113 x E36 (47-169 x C29)	51	142	110	4 x 3
E113 x E16 (47-169 x C8)	35	111	26	4 x 2
E113 x E19 (47-169 x C12)	0	0	0	4 x 3
E113 x E23 (47-169 x C16)	34	45	42	4 x 2
E113 x C85 (47-169 x C103)	43	2	45	4 x 2
E113 x E205 (47-169 x C368)	1	0	1	4 x 2
E113 x E25 (47-169 x C18)	210	9	12	4 x 2
E83 x E43 (47-55 x C86)	28	51	48	5 x 1
E113 x C123 (47-55 x C141)	0	0	0	5 x 2
E83 x C364 (47-55 x C364)	185	123	172	5 x 3
E83 x C365 (47-55 x C365)	250	197	192	5 x 3
E83 x C143 (47-55 x C161)	44	16	11	5 x 2
E83 x E39 (47-55 x C78)	46	89	103	4 x 3
E121 x E43 (47-190 x C86)	0	3	0	4 x 1
E121 x C123 (47-190 x C141)	0	0	0	4 x 2
E121 x C364 (47-190 x C364)	39	45	30	4 x 3
E121 x C365 (47-190 x C365)	41	62	55	4 x 3
E121 x C123 (47-190 x C161)	32	26	28	4 x 2
E121 x E39 (47-190 x C78)	5	15	12	4 x 3
Supermater x azole resistant TR46
E83 x E40 (47-51 x C79)	133	80	100	3 x 3
E83 x E46 (47-51 x C89)	4	9	15	3 x 3
E83 x E50 (47-51 x C93)	0	0	0	3 x 3
E83 x C370 (47-51 x C370)	301	195	209	3 x 3
E113 x E40 (47-169 x C79)	9	28	7	4 x 3
E113 x E46 (47-169 x C89)	7	3	5	4 x 3
E113 x E50 (47-169 x C93)	0	0	0	4 x 3
E113 x C370 (47-169 x C370)	4	182	286	4 x 3
*Crossing data shows BDUN isolate numbers in parentheses
