# Supplementary material for: Recent European origin of azole resistance in the critical priority fungal pathogen Aspergillus fumigatus
Source: Research Square preprint supplement (doi:10.21203/rs.3.rs-7905776/v1), 2025-11-13
Supplement: Supplementary file 2 [file a38ca19eef1d481e11b09e19.xlsx]

## Sheet: cluster1
Orthogroup	Number_pos_present_in	Number_neg_present_in	Number_pos_not_present_in	Number_neg_not_present_in	Sensitivity	Specificity	Odds_ratio	Naive_p	Bonferroni_p	Benjamini_H_p	Max_Pairwise_comparisons	Max_supporting_pairs	Max_opposing_pairs	Best_pairwise_comp_p	Worst_pairwise_comp_p	Af293 Reference	Pfam Domain(s)	Annotation Class
OG0004436	62	1015	17	4	78.48101265822784	0.39254170755642787	0.014372645609968124	3.146166838895429e-17	2.1107633322149431e-13	2.1107633322149431e-13	3	1	2	1	1	Afu6g00140		Reference-Containing Family
OG0004008	63	1016	16	3	79.74683544303798	0.2944062806673209	0.011626476377952756	9.232002223377401e-17	6.193750291663899e-13	3.0968751458319494e-13	3	1	2	1	1	Afu6g00180		Reference-Containing Family
OG0005822	64	1017	15	2	81.0127	0.19627085377821393	0.00839069	2.3169556047051215e-16	1.554445515196666e-12	5.181485050655553e-13	2	1	1	1	1	Afu2g09590	EPSP synthase (3-phosphoshikimate 1-carboxyvinyltransferase)	Reference-Containing Family
OG0003723	62	1013	17	6	78.48101265822784	0.5888125613346418	0.021601533012020207	4.745513172909716e-16	3.1837647877051288e-12	7.024091773295864e-13	4	2	2	1	1	Afu6g00110|Afu6g00120	Fungal Zn(2)-Cys(6) binuclear cluster domain|Fungal specific transcription factor domain	Reference-Containing Family
OG0000345	66	1019	13	0	83.54430379746836	0	0	5.234827674240472e-16	3.5120458866479323e-12	7.024091773295864e-13	1	0	1	1	1	Afu1g07240		Reference-Containing Family
OG0003957	65	1017	14	2	82.27848101265823	0.19627085377821393	0.0091305	3.4053215821018994e-15	2.2846302494321643e-11	3.807717082386941e-12	3	2	1	1	1	Afu3g13740		Reference-Containing Family
OG0002752	13	1	66	1018	16.455696202531644	99.90186457311088	200.5151515151515	6.914797255951043e-15	4.639137479017554e-11	6.627339255739363e-12	2	1	1	1	1		Cutinase	Annotated Domain
OG0002968	67	1019	12	0	84.81012658227847	0	0	8.485108737647508e-15	5.6926594520877133e-11	7.115824315109642e-12	2	0	2	0.5	0.5	Afu1g12500		Reference-Containing Family
OG0005181	61	1007	18	12	77.21518987341773	1.1776251226692835	0.040384	1.680139314432034e-14	1.1272054660524515e-10	1.2524505178360573e-11	3	1	2	1	1	Afu6g09785		Reference-Containing Family
OG0002373	21	22	58	997	26.582278481012654	97.84102060843965	16.40830721003135	2.1134028248381105e-14	1.4178819551838882e-10	1.4178819551838882e-11	3	2	1	1	1	Afu1g00780	YDR124W-like helical bundle domain	Reference-Containing Family
OG0002783	22	26	57	993	27.848101265822784	97.44847890088322	14.740890688259109	2.437797897255415e-14	1.6355186092686578e-10	1.4868350993351436e-11	5	3	4	0.375	1	Afu8g01795		Reference-Containing Family
OG0000391	59	999	20	20	74.68354430379746	1.9627085377821394	0.0590591	5.5479717355861485e-14	3.722134237404747e-10	3.1017785311706225e-11	3	2	2	1	1		Fungal specific transcription factor domain	Annotated Domain
OG0001723	34	93	45	926	43.037974683544306	90.87340529931305	7.523058542413382	7.854236502780537e-14	5.269407269715463e-10	4.053390207473433e-11	3	2	3	0.25	1	Afu8g01680		Reference-Containing Family
OG0002703	12	1	67	1018	15.18987341772152	99.90186457311088	182.32835820895522	1.0402462038020614e-13	6.979011781308029e-10	4.985008415220021e-11	2	1	1	1	1		AAA domain|fungal STAND N-terminal Goodbye domain	Annotated Domain
OG0002959	11	0	68	1019	13.924050632911392	100	inf	1.3563695879153995e-13	9.099883565324415e-10	5.6874272283277595e-11	1	1	0	1	1			Unknown
OG0004171	68	1019	11	0	86.07594936708861	0	0	1.3563695879153995e-13	9.099883565324415e-10	5.6874272283277595e-11	1	0	1	1	1	Afu1g02740		Reference-Containing Family
OG0002667	13	3	66	1016	16.455696202531644	99.70559371933267	66.70707070707071	2.4620374065111964e-13	1.6517808960283617e-09	9.176560533490899e-11	3	1	2	1	1		Protein of unknown function (DUF2985)	Annotated Domain
OG0003877	66	1016	13	3	83.54430379746836	0.2944062806673209	0.0149909	2.4620374065111964e-13	1.6517808960283617e-09	9.176560533490899e-11	3	2	1	1	1	Afu2g00560		Reference-Containing Family
OG0002436	30	72	49	947	37.9747	92.9342	8.052721088435375	2.687833355546956e-13	1.803267398236453e-09	9.490881043349752e-11	4	3	3	0.625	0.625	Afu1g15990|Afu5g14865	Myb-like DNA-binding domain	Reference-Containing Family
OG0005237	64	1010	15	9	81.0127	0.8832188420019628	0.0380198	1.4927496605073363e-12	1.0014857472343719e-08	4.90174654221085e-10	3	1	2	1	1	Afu8g05470		Reference-Containing Family
OG0004644	68	1018	11	1	86.07594936708861	0.0981354	0.00607251	1.5343073093818431e-12	1.0293667738642786e-08	4.90174654221085e-10	2	1	1	1	1	Afu1g04220		Reference-Containing Family
OG0003200	10	0	69	1019	12.658227848101266	100	inf	2.1387392922494423e-12	1.4348801911701508e-08	6.522182687137049e-10	1	1	0	1	1			Unknown
OG0005983	14	7	65	1012	17.72151898734177	99.31305201177625	31.138461538461538	2.4723783574343216e-12	1.6587186400026865e-08	7.211820173924723e-10	5	5	1	0.0625	0.375	Afu3g03690		Reference-Containing Family
OG0002799	11	2	68	1017	13.924050632911392	99.80372914622178	82.25735294117646	9.400862098895027e-12	6.307038382148673e-08	2.5228153528594694e-09	2	1	1	1	1			Unknown
OG0002911	11	2	68	1017	13.924050632911392	99.80372914622178	82.25735294117646	9.400862098895027e-12	6.307038382148673e-08	2.5228153528594694e-09	3	1	2	1	1			Unknown
OG0003197	9	0	70	1019	11.39240506329114	100	inf	3.327267270372217e-11	2.2322636116927205e-07	7.972370041759716e-09	1	1	0	1	1			Unknown
OG0003308	9	0	70	1019	11.39240506329114	100	inf	3.327267270372217e-11	2.2322636116927205e-07	7.972370041759716e-09	2	2	0	0.5	0.5			Unknown
OG0003315	9	0	70	1019	11.39240506329114	100	inf	3.327267270372217e-11	2.2322636116927205e-07	7.972370041759716e-09	1	1	0	1	1			Unknown
OG0004480	67	1014	12	5	84.81012658227847	0.49067713444553485	0.027531229454306378	3.915221383820931e-11	2.626722026405462e-07	9.057662160018835e-09	2	1	1	1	1	Afu7g02620	RNA polymerases N / 8 kDa subunit	Reference-Containing Family
OG0005033	68	1016	11	3	86.07594936708861	0.2944062806673209	0.0182534	4.1352850078026346e-11	2.7743627117347875e-07	9.247875705782626e-09	5	3	4	0.375	1	Afu4g11490		Reference-Containing Family
OG0004482	68	1015	11	4	86.07594936708861	0.39254170755642787	0.024361845051500224	1.4616951913138816e-10	9.806513038524832e-07	3.163391302749946e-08	2	1	1	1	1	Afu7g04630		Reference-Containing Family
OG0006552	65	1007	14	12	82.27848101265823	1.1776251226692835	0.055326996737125836	1.537228725273439e-10	1.0313267517859501e-06	3.222896099331094e-08	2	1	1	1	1	Afu6g10200		Reference-Containing Family
OG0002055	17	23	62	996	21.518987341772153	97.74288518155055	11.873772791023843	1.6032542017602183e-10	1.0756232439609306e-06	3.2594643756391836e-08	5	3	3	1	1		hAT family C-terminal dimerisation region	Annotated Domain
OG0001805	38	163	41	856	48.10126582278481	84.00392541707556	4.867275175819243	2.539621237035176e-10	1.7038318879268997e-06	5.011270258608529e-08	5	4	3	0.375	1	Afu6g03130		Reference-Containing Family
OG0003459	70	1018	9	1	88.60759493670885	0.0981354	0.00764025	3.1347807340640025e-10	2.1031243944835394e-06	6.008926841381541e-08	2	1	1	1	1	Afu1g16360		Reference-Containing Family
OG0000425	58	975	21	44	73.41772151898735	4.317958783120707	0.12463980463980465	3.7063935742245953e-10	2.486619448947281e-06	6.90727624707578e-08	4	2	2	1	1			Unknown
OG0002804	11	5	68	1014	13.924050632911392	99.50932286555447	32.805882352941175	4.4087566619327716e-10	2.9578348444906964e-06	7.994148228353233e-08	4	2	2	1	1			Unknown
OG0002216	71	1019	8	0	89.87341772151899	0	0	5.108058203813118e-10	3.4269962489382206e-06	8.159514878424335e-08	1	0	1	1	1	Afu3g15270	AMP-binding enzyme|AMP-binding enzyme|Phosphopantetheine attachment site|Phosphopantetheine attachment site|Condensation domain|Condensation domain	Reference-Containing Family
OG0003054	71	1019	8	0	89.87341772151899	0	0	5.108058203813118e-10	3.4269962489382206e-06	8.159514878424335e-08	1	0	1	1	1	Afu3g15310	Methyltransferase domain	Reference-Containing Family
OG0003191	8	0	71	1019	10.126582278481013	100	inf	5.108058203813118e-10	3.4269962489382206e-06	8.159514878424335e-08	1	1	0	1	1			Unknown
OG0003303	8	0	71	1019	10.126582278481013	100	inf	5.108058203813118e-10	3.4269962489382206e-06	8.159514878424335e-08	1	1	0	1	1			Unknown
OG0003440	8	0	71	1019	10.126582278481013	100	inf	5.108058203813118e-10	3.4269962489382206e-06	8.159514878424335e-08	2	2	0	0.5	0.5			Unknown
OG0005208	60	984	19	35	75.9494	3.434739941118744	0.1123234916559692	5.706431517556806e-10	3.828444905128861e-06	8.903360244485723e-08	2	1	1	1	1	Afu7g03660		Reference-Containing Family
OG0000338	67	1011	12	8	84.81012658227847	0.7850834151128557	0.0441807	6.681141112948939e-10	4.4823775726774426e-06	1.0061355227330547e-07	3	2	1	1	1	Afu6g00196		Reference-Containing Family
OG0002488	13	11	66	1008	16.455696202531644	98.92051030421982	18.049586776859503	6.88072840858481e-10	4.616280689319549e-06	1.0061355227330547e-07	3	2	1	1	1			Unknown
OG0001863	15	18	64	1001	18.9873	98.23356231599607	13.033854166666666	7.05892195107773e-10	4.73583073697805e-06	1.0061355227330547e-07	4	3	2	0.625	1	Afu6g14670|Afu6g14690		Reference-Containing Family
OG0002170	15	18	64	1001	18.9873	98.23356231599607	13.033854166666666	7.05892195107773e-10	4.73583073697805e-06	1.0061355227330547e-07	3	1	3	0.25	1			Unknown
OG0003115	16	22	63	997	20.253164556962027	97.84102060843965	11.50937950937951	7.198465507704073e-10	4.8294505091186626e-06	1.0061355227330547e-07	3	2	1	1	1	Afu1g00250		Reference-Containing Family
OG0002331	14	15	65	1004	17.72151898734177	98.528	14.416410256410256	1.0372166127830135e-09	6.9586862551612376e-06	1.420140052073722e-07	4	2	2	1	1			Unknown
OG0000397	63	996	16	23	79.74683544303798	2.2571148184494603	0.0909262	1.1527472830425354e-09	7.73378152193237e-06	1.4872656772946864e-07	3	1	2	1	1			Unknown
OG0003606	16	23	63	996	20.253164556962027	97.74288518155055	10.99792960662526	1.1527472830425354e-09	7.73378152193237e-06	1.4872656772946864e-07	3	2	1	1	1	Afu1g00330		Reference-Containing Family
OG0004615	16	23	63	996	20.253164556962027	97.74288518155055	10.99792960662526	1.1527472830425354e-09	7.73378152193237e-06	1.4872656772946864e-07	3	2	1	1	1	Afu1g00210		Reference-Containing Family
OG0002544	12	9	67	1010	15.18987341772152	99.11678115799803	20.09950248756219	1.4698120994749971e-09	9.860969375377756e-06	1.860560259505237e-07	5	4	1	0.375	0.375		Protein of unknown function (DUF 659)	Annotated Domain

## Sheet: cluster2
Orthogroup	Number_pos_present_in	Number_neg_present_in	Number_pos_not_present_in	Number_neg_not_present_in	Sensitivity	Specificity	Odds_ratio	Naive_p	Bonferroni_p	Benjamini_H_p	Max_Pairwise_comparisons	Max_supporting_pairs	Max_opposing_pairs	Best_pairwise_comp_p	Worst_pairwise_comp_p	Af293 Reference	Pfam Domain(s)	Annotation Class
OG0001641	58	38	2	1000	96.6667	96.3391	763.158	6.37729e-68	4.27852e-64	4.27852e-64	3	3	2	0.25	1			Unknown
OG0001645	56	39	4	999	93.3333	96.2428	358.615	4.7136e-63	3.16236e-59	1.58118e-59	2	2	2	0.5	0.5			Unknown
OG0001608	59	83	1	955	98.3333	92.0039	678.855	7.42509e-57	4.98149e-53	1.6605e-53	2	2	1	0.5	1	Afu1g00810		Reference-Containing Family
OG0002944	60	99	0	939	100	90.4624	inf	5.97426e-56	4.00813e-52	1.00203e-52	2	2	0	0.5	0.5	Afu7g08620		Reference-Containing Family
OG0001229	60	153	0	885	100	85.2601	inf	9.50883e-47	6.37947e-43	1.27589e-43	2	2	0	0.5	0.5			Unknown
OG0001322	57	127	3	911	95	87.7649	136.291	3.67126e-44	2.46305e-40	4.10508e-41	2	2	2	0.5	0.5			Unknown
OG0001131	60	181	0	857	100	82.5626	inf	5.10138e-43	3.42252e-39	4.88931e-40	2	2	0	0.5	0.5		Phosphotransferase enzyme family	Annotated Domain
OG0001107	60	202	0	836	100	80.5395	inf	1.54767e-40	1.03833e-36	1.29792e-37	2	2	0	0.5	0.5			Unknown
OG0001081	58	167	2	871	96.6667	83.9114	151.251	2.14926e-40	1.44194e-36	1.60215e-37	2	2	1	0.5	1	Afu3g04100|Afu3g04270		Reference-Containing Family
OG0001068	6	918	54	120	10	11.5607	0.0145243	5.65152e-40	3.79161e-36	3.79161e-37	3	2	2	1	1	Afu5g00450	Carboxylesterase family	Reference-Containing Family
OG0005808	0	820	60	218	0	21.0019	0	8.56996e-39	5.74959e-35	5.2269e-36	3	0	3	0.25	0.25	Afu2g08680		Reference-Containing Family
OG0001214	57	168	3	870	95	83.815	98.3929	2.16184e-38	1.45038e-34	1.20865e-35	3	2	1	1	1		RNase H	Annotated Domain
OG0001222	54	140	6	898	90	86.5125	57.7286	5.10689e-37	3.42621e-33	2.63555e-34	2	2	1	0.5	1			Unknown
OG0001199	6	895	54	143	10	13.7765	0.0177529	1.31695e-36	8.83542e-33	6.31101e-34	3	2	2	1	1	Afu5g00440	Acetyltransferase (GNAT) domain	Reference-Containing Family
OG0001132	55	170	5	868	91.6667	83.6224	56.1647	9.14837e-35	6.13764e-31	4.09176e-32	2	2	2	0.5	0.5		Ankyrin repeats (3 copies)|Ankyrin repeats (3 copies)|Ankyrin repeat|NACHT domain	Annotated Domain
OG0001799	37	32	23	1006	61.6667	96.9171	50.5734	4.42014e-34	2.96547e-30	1.85342e-31	3	1	3	0.25	1			Unknown
OG0000634	0	768	60	270	0	26.0116	0	8.0208e-34	5.38115e-30	3.16538e-31	2	0	2	0.5	0.5			Unknown
OG0001541	44	76	16	962	73.3333	92.6782	34.8092	6.39813e-33	4.2925e-29	2.38472e-30	3	1	3	0.25	1		Pectate lyase superfamily protein|Pectate lyase superfamily protein|LysM domain	Annotated Domain
OG0001447	47	100	13	938	78.3333	90.3661	33.9123	8.9283e-33	5.99e-29	3.15263e-30	3	3	2	0.25	1			Unknown
OG0001129	57	223	3	815	95	78.5164	69.4395	2.40393e-32	1.6128e-28	8.06398e-30	3	2	2	1	1		Ankyrin repeats (3 copies)|Ankyrin repeats (3 copies)	Annotated Domain
OG0001149	56	220	4	818	93.3333	78.8054	52.0545	5.20257e-31	3.4904e-27	1.6621e-28	3	2	1	1	1			Unknown
OG0001490	42	78	18	960	70	92.4855	28.7179	6.12638e-30	4.11019e-26	1.86827e-27	2	2	2	0.5	0.5			Unknown
OG0003747	60	329	0	709	100	68.3044	inf	3.87782e-29	2.60163e-25	1.13114e-26	2	2	0	0.5	0.5	Afu7g08235		Reference-Containing Family
OG0002117	59	307	1	731	98.3333	70.4239	140.485	1.04716e-28	7.0254e-25	2.92725e-26	2	2	1	0.5	1	Afu1g01080		Reference-Containing Family
OG0001378	45	110	15	928	75	89.4027	25.3091	1.17019e-28	7.85084e-25	3.14033e-26	2	2	2	0.5	0.5			Unknown
OG0001105	60	347	0	691	100	66.5703	inf	7.31976e-28	4.91083e-24	1.88878e-25	2	2	0	0.5	0.5	Afu7g08240		Reference-Containing Family
OG0004755	0	685	60	353	0	34.0077	0	1.8891e-27	1.2674e-23	4.69408e-25	3	0	3	0.25	0.25	Afu1g16900	Fungal specific transcription factor domain	Reference-Containing Family
OG0000588	7	825	53	213	11.6667	20.5202	0.0340995	2.58581e-27	1.73482e-23	6.19578e-25	3	3	1	0.25	1			Unknown
OG0000938	59	331	1	707	98.3333	68.1118	126.021	5.92741e-27	3.9767e-23	1.37128e-24	2	2	1	0.5	1			Unknown
OG0000956	59	340	1	698	98.3333	67.2447	121.124	2.51071e-26	1.68444e-22	5.61479e-24	2	2	1	0.5	1		Fungal WD-like	Annotated Domain
OG0000861	59	353	1	685	98.3333	65.9923	114.49	1.89885e-25	1.27394e-21	4.10947e-23	2	2	1	0.5	1			Unknown
OG0000922	56	287	4	751	93.3333	72.3507	36.6341	2.49491e-25	1.67384e-21	5.23074e-23	2	2	1	0.5	1			Unknown
OG0001917	11	855	49	183	18.3333	17.6301	0.0480487	4.50175e-25	3.02022e-21	9.15219e-23	3	2	2	1	1	Afu5g00320		Reference-Containing Family
OG0001459	41	103	19	935	68.3333	90.0771	19.5887	7.78573e-25	5.22344e-21	1.53631e-22	3	2	2	1	1			Unknown
OG0000866	57	334	3	704	95	67.8227	40.0479	1.80939e-23	1.21392e-19	3.46834e-21	2	2	1	0.5	1		RNase H|Endonuclease-reverse transcriptase|Reverse transcriptase (RNA-dependent DNA polymerase)	Annotated Domain
OG0000894	60	419	0	619	100	59.6339	inf	2.63857e-23	1.77021e-19	4.91726e-21	2	2	0	0.5	0.5	Afu1g00160		Reference-Containing Family
OG0000990	56	320	4	718	93.3333	69.1715	31.4125	5.57687e-23	3.74152e-19	1.01122e-20	3	2	2	1	1			Unknown
OG0003357	1	644	59	394	1.66667	37.9576	0.0103695	7.29375e-23	4.89337e-19	1.28773e-20	3	1	3	0.25	1	Afu3g00100	Endoribonuclease L-PSP|Flavin containing amine oxidoreductase	Reference-Containing Family
OG0002097	24	16	36	1022	40	98.4586	42.5833	1.13426e-22	7.60973e-19	1.95121e-20	3	2	2	1	1			Unknown
OG0002202	22	12	38	1026	36.6667	98.8439	49.5	9.10992e-22	6.11184e-18	1.52796e-19	3	3	2	0.25	1			Unknown
OG0000825	58	391	2	647	96.6667	62.3314	47.9872	2.07044e-21	1.38906e-17	3.38795e-19	2	2	1	0.5	1	Afu1g16010|Afu1g16020		Reference-Containing Family
OG0001180	45	177	15	861	75	82.948	14.5932	4.19677e-21	2.81561e-17	6.70384e-19	3	3	2	0.25	1		Reverse transcriptase (RNA-dependent DNA polymerase)|Endonuclease-reverse transcriptase	Annotated Domain
OG0000410	60	462	0	576	100	55.4913	inf	6.38555e-21	4.28406e-17	9.96294e-19	2	2	0	0.5	0.5			Unknown
OG0002980	21	920	39	118	35	11.368	0.0690635	9.02877e-21	6.0574e-17	1.37115e-18	3	2	2	1	1	Afu3g09120		Reference-Containing Family
OG0001757	60	465	0	573	100	55.2023	inf	9.19683e-21	6.17016e-17	1.37115e-18	2	2	0	0.5	0.5	Afu5g00210		Reference-Containing Family
OG0002148	22	15	38	1023	36.6667	98.5549	39.4842	1.40172e-20	9.40411e-17	2.04437e-18	3	3	2	0.25	1			Unknown
OG0001506	51	267	9	771	85	74.2775	16.3633	1.83767e-20	1.23289e-16	2.62317e-18	2	2	2	0.5	0.5	Afu1g01070		Reference-Containing Family
OG0002036	23	19	37	1019	38.3333	98.1696	33.3385	2.08709e-20	1.40023e-16	2.91715e-18	2	1	2	0.5	1			Unknown
OG0001175	60	472	0	566	100	54.5279	inf	2.13611e-20	1.43312e-16	2.92473e-18	2	2	0	0.5	0.5	Afu5g00155|Afu7g08430		Reference-Containing Family
OG0002641	60	479	0	559	100	53.8536	inf	4.90382e-20	3.28997e-16	6.57995e-18	2	2	0	0.5	0.5	Afu7g07050|Afu7g08300		Reference-Containing Family
OG0001627	30	55	30	983	50	94.7013	17.8727	5.01092e-20	3.36183e-16	6.59182e-18	3	3	1	0.25	1		RNase H-like domain found in reverse transcriptase|Reverse transcriptase (RNA-dependent DNA polymerase)|Integrase zinc binding domain|Integrase core domain	Annotated Domain
OG0005178	58	420	2	618	96.6667	59.5376	42.6714	9.11643e-20	6.11621e-16	1.17619e-17	2	2	1	0.5	1	Afu6g09340		Reference-Containing Family
OG0001714	60	485	0	553	100	53.2755	inf	9.90724e-20	6.64677e-16	1.25411e-17	2	2	0	0.5	0.5	Afu5g00240|Afu5g00250	Beta-mannosyltransferases	Reference-Containing Family
OG0001525	6	706	54	332	10	31.9846	0.0522506	1.23156e-19	8.26253e-16	1.5301e-17	3	2	3	0.25	1	Afu1g13650		Reference-Containing Family
OG0001156	60	492	0	546	100	52.6012	inf	3.34046e-19	2.24111e-15	4.07475e-17	2	2	0	0.5	0.5	Afu5g00230|Afu7g07140|Afu7g08380		Reference-Containing Family
OG0001008	51	288	9	750	85	72.2543	14.7569	4.97495e-19	3.3377e-15	5.96017e-17	2	2	2	0.5	0.5	Afu1g00890|Afu1g01090	Protein of unknown function (DUF3435)	Reference-Containing Family
OG0004485	59	464	1	574	98.3333	55.2987	72.9871	5.43528e-19	3.64653e-15	6.39742e-17	2	2	1	0.5	1	Afu7g07020		Reference-Containing Family
OG0001272	59	476	1	562	98.3333	54.1426	69.6597	2.97661e-18	1.99701e-14	3.44311e-16	2	2	1	0.5	1	Afu7g08220		Reference-Containing Family
OG0000648	9	737	51	301	15	28.9981	0.0720728	3.39825e-18	2.27988e-14	3.86421e-16	2	2	1	0.5	1		Glutathione-dependent formaldehyde-activating enzyme	Annotated Domain
OG0001830	59	483	1	555	98.3333	53.4682	67.795	5.24109e-18	3.51625e-14	5.86041e-16	2	2	1	0.5	1	Afu5g00190		Reference-Containing Family
OG0002773	10	750	50	288	16.6667	27.7457	0.0768	5.74167e-18	3.85209e-14	6.3149e-16	2	2	1	0.5	1	Afu4g00830	POT family	Reference-Containing Family
OG0001317	56	407	4	631	93.3333	60.79	21.7052	9.08717e-18	6.09658e-14	9.8332e-16	3	2	2	1	1	Afu7g08231		Reference-Containing Family
OG0001359	58	460	2	578	96.6667	55.684	36.4391	1.6437e-17	1.10276e-13	1.7451e-15	2	2	1	0.5	1	Afu7g08245		Reference-Containing Family
OG0006545	60	528	0	510	100	49.1329	inf	1.66473e-17	1.11687e-13	1.7451e-15	2	2	0	0.5	0.5	Afu6g09353		Reference-Containing Family
OG0001622	58	463	2	575	96.6667	55.395	36.0151	1.96609e-17	1.31905e-13	2.02931e-15	2	2	1	0.5	1	Afu7g08260		Reference-Containing Family
OG0001029	50	299	10	739	83.3333	71.1946	12.3579	2.80281e-17	1.88041e-13	2.8491e-15	3	3	1	0.25	1			Unknown
OG0005179	60	536	0	502	100	48.3622	inf	3.03577e-17	2.0367e-13	3.03984e-15	2	2	0	0.5	0.5	Afu6g09360		Reference-Containing Family
OG0000636	59	501	1	537	98.3333	51.7341	63.2395	3.94051e-17	2.64369e-13	3.88778e-15	2	2	1	0.5	1		Helicase conserved C-terminal domain|Protein of unknown function (DUF3435)|DEAD/DEAH box helicase|Orsellinic acid/F9775 biosynthesis cluster protein D	Annotated Domain
OG0000889	55	401	5	637	91.6667	61.368	17.4738	6.89756e-17	4.62757e-13	6.70663e-15	3	2	2	1	1			Unknown
OG0000706	59	517	1	521	98.3333	50.1927	59.4565	2.21475e-16	1.48588e-12	2.12268e-14	2	2	1	0.5	1	Afu1g16050|Afu5g14950		Reference-Containing Family
OG0000972	51	334	9	704	85	67.8227	11.9441	3.10532e-16	2.08336e-12	2.93431e-14	2	2	1	0.5	1			Unknown
OG0000566	59	522	1	516	98.3333	49.711	58.3218	5.94092e-16	3.98577e-12	5.53578e-14	2	2	1	0.5	1		Reverse transcriptase (RNA-dependent DNA polymerase)|Integrase core domain|RNase H-like domain found in reverse transcriptase|Integrase zinc binding domain	Annotated Domain
OG0000783	57	471	3	567	95	54.6243	22.8726	9.452e-16	6.34134e-12	8.68677e-14	2	2	1	0.5	1			Unknown
OG0002306	57	472	3	566	95	54.5279	22.7839	1.03067e-15	6.91477e-12	9.34428e-14	2	2	1	0.5	1	Afu1g00270|Afu5g00220		Reference-Containing Family
OG0001745	25	52	35	986	41.6667	94.9904	13.544	2.18357e-15	1.46496e-11	1.95328e-13	2	1	2	0.5	1			Unknown
OG0001604	57	484	3	554	95	53.3719	21.7479	4.23678e-15	2.84245e-11	3.74007e-13	3	2	2	1	1	Afu7g07040		Reference-Containing Family
OG0002269	17	14	43	1024	28.3333	98.6513	28.9169	4.92505e-15	3.30422e-11	4.29119e-13	3	2	2	1	1		Haemolysin-III related	Annotated Domain
OG0001236	57	487	3	551	95	53.0829	21.4969	5.26913e-15	3.53506e-11	4.53213e-13	3	2	1	1	1	Afu8g06280		Reference-Containing Family
OG0001499	31	100	29	938	51.6667	90.3661	10.0269	5.37595e-15	3.60672e-11	4.56547e-13	2	1	2	0.5	1			Unknown
OG0001570	29	85	31	953	48.3333	91.8112	10.4884	8.0963e-15	5.4318e-11	6.78976e-13	3	2	2	1	1			Unknown
OG0002993	60	593	0	445	100	42.8709	inf	1.26167e-14	8.46453e-11	1.045e-12	2	2	0	0.5	0.5	Afu6g09420	Tetratricopeptide repeat	Reference-Containing Family
OG0000764	2	513	58	525	3.33333	50.578	0.0352894	1.61558e-14	1.08389e-10	1.32182e-12	3	0	3	0.25	0.25			Unknown
OG0000677	10	690	50	348	16.6667	33.526	0.10087	1.65984e-14	1.11359e-10	1.3271e-12	3	2	3	0.25	1	Afu1g09757		Reference-Containing Family
OG0000061	60	598	0	440	100	42.3892	inf	1.66159e-14	1.11476e-10	1.3271e-12	2	2	0	0.5	0.5	Afu1g16060|Afu5g14960|Afu5g14970		Reference-Containing Family
OG0000695	9	666	51	372	15	35.8382	0.0985692	3.23235e-14	2.16858e-10	2.55127e-12	3	2	2	1	1			Unknown
OG0003070	60	600	0	438	100	42.1965	inf	3.54888e-14	2.38094e-10	2.7416e-12	2	2	0	0.5	0.5	Afu6g09395		Reference-Containing Family
OG0002444	60	602	0	436	100	42.0039	inf	3.55521e-14	2.38519e-10	2.7416e-12	2	2	0	0.5	0.5	Afu6g09450		Reference-Containing Family
OG0001601	60	603	0	435	100	41.9075	inf	3.6145e-14	2.42497e-10	2.75565e-12	2	2	0	0.5	0.5	Afu6g09307	Glycosyl hydrolases family 18|Chitin recognition protein	Reference-Containing Family
OG0003156	60	606	0	432	100	41.6185	inf	4.01707e-14	2.69506e-10	3.02815e-12	2	2	0	0.5	0.5	Afu6g09330	DDE superfamily endonuclease	Reference-Containing Family
OG0001668	60	609	0	429	100	41.3295	inf	4.77424e-14	3.20304e-10	3.51982e-12	2	2	0	0.5	0.5	Afu6g09430		Reference-Containing Family
OG0002501	60	609	0	429	100	41.3295	inf	4.77424e-14	3.20304e-10	3.51982e-12	2	2	0	0.5	0.5	Afu6g09317	LysM domain|LysM domain	Reference-Containing Family
OG0000898	51	376	9	662	85	63.7765	9.97695	5.11328e-14	3.4305e-10	3.72881e-12	2	2	2	0.5	0.5			Unknown
OG0001189	40	214	20	824	66.6667	79.3834	7.70093	1.48034e-13	9.93162e-10	1.06792e-11	3	3	2	0.25	1		Transmembrane amino acid transporter protein	Annotated Domain
OG0000993	2	490	58	548	3.33333	52.7938	0.0385644	1.77578e-13	1.19137e-09	1.26742e-11	3	2	1	1	1	Afu4g01115		Reference-Containing Family
OG0000659	54	449	6	589	90	56.7437	11.8062	2.20281e-13	1.47786e-09	1.55565e-11	3	1	3	0.25	1		Orsellinic acid/F9775 biosynthesis cluster protein D|DEAD/DEAH box helicase|Helicase conserved C-terminal domain	Annotated Domain
OG0004396	55	473	5	565	91.6667	54.4316	13.1395	2.65561e-13	1.78165e-09	1.85588e-11	3	2	2	1	1	Afu5g00170|Afu7g08390		Reference-Containing Family
OG0000905	0	415	60	623	0	60.0193	0	2.73577e-13	1.83543e-09	1.87093e-11	2	0	2	0.5	0.5			Unknown
OG0001510	60	622	0	416	100	40.0771	inf	2.74827e-13	1.84381e-09	1.87093e-11	2	2	0	0.5	0.5	Afu6g09400		Reference-Containing Family
OG0001024	57	525	3	513	95	49.422	18.5657	2.76081e-13	1.85222e-09	1.87093e-11	3	2	1	1	1	Afu8g06132	Protein of unknown function (DUF3435)	Reference-Containing Family
OG0001706	60	625	0	413	100	39.7881	inf	2.79438e-13	1.87475e-09	1.87475e-11	2	2	0	0.5	0.5	Afu6g09335|Afu6g09356	SRF-type transcription factor (DNA-binding and dimerisation domain)	Reference-Containing Family
OG0000879	52	412	8	626	86.6667	60.3083	9.87621	3.83299e-13	2.57155e-09	2.54609e-11	2	2	2	0.5	0.5			Unknown
OG0000935	0	402	60	636	0	61.2717	0	7.36476e-13	4.94102e-09	4.84413e-11	2	0	2	0.5	0.5			Unknown
OG0000701	3	502	57	536	5	51.6378	0.0561963	8.49297e-13	5.69793e-09	5.53197e-11	3	1	2	1	1		DDE superfamily endonuclease|GAG-pre-integrase domain|Tc5 transposase DNA-binding domain|Reverse transcriptase (RNA-dependent DNA polymerase)|hAT family C-terminal dimerisation region	Annotated Domain
OG0003374	3	501	57	537	5	51.7341	0.0564135	8.90536e-13	5.97461e-09	5.74481e-11	2	1	2	0.5	1	Afu5g01005		Reference-Containing Family
OG0003075	10	1	50	1037	16.6667	99.9037	207.4	1.17974e-12	7.91487e-09	7.53797e-11	2	1	1	1	1			Unknown
OG0000813	54	468	6	570	90	54.9133	10.9615	1.34684e-12	9.03595e-09	8.52448e-11	3	3	2	0.25	1			Unknown
OG0000482	33	947	27	91	55	8.76686	0.117447	1.93471e-12	1.298e-08	1.21308e-10	3	3	1	0.25	1			Unknown
OG0000726	58	578	2	460	96.6667	44.316	23.0796	2.28477e-12	1.53285e-08	1.41931e-10	2	2	1	0.5	1			Unknown
OG0001746	22	55	38	983	36.6667	94.7013	10.3474	3.69831e-12	2.4812e-08	2.27633e-10	3	2	2	1	1		Ribosomal L32p protein family	Annotated Domain
OG0001065	43	280	17	758	71.6667	73.025	6.84748	3.95003e-12	2.65008e-08	2.40916e-10	3	2	3	0.25	1			Unknown
OG0000013	58	583	2	455	96.6667	43.8343	22.6329	4.55354e-12	3.05497e-08	2.75223e-10	3	2	2	1	1		Helicase conserved C-terminal domain|DEAD/DEAH box helicase|Orsellinic acid/F9775 biosynthesis cluster protein D	Annotated Domain
OG0000745	57	557	3	481	95	46.3391	16.4075	6.95469e-12	4.6659e-08	4.16598e-10	2	2	2	0.5	0.5			Unknown
OG0000760	56	537	4	501	93.3333	48.2659	13.0615	1.08021e-11	7.24713e-08	6.41339e-10	3	2	2	1	1			Unknown
OG0002498	57	568	3	470	95	45.2794	15.7218	1.90064e-11	1.27514e-07	1.11854e-09	3	3	1	0.25	1	Afu5g15060		Reference-Containing Family
OG0000059	19	774	41	264	31.6667	25.4335	0.158064	1.92425e-11	1.29098e-07	1.12077e-09	3	2	2	1	1	Afu1g00680|Afu8g06310	Patatin-like phospholipase	Reference-Containing Family
OG0001113	40	250	20	788	66.6667	75.9152	6.304	1.93783e-11	1.30009e-07	1.12077e-09	3	3	2	0.25	1			Unknown
OG0000460	60	676	0	362	100	34.8748	inf	2.46027e-11	1.6506e-07	1.41077e-09	2	2	0	0.5	0.5		Phosphotransferase enzyme family	Annotated Domain
OG0000840	52	451	8	587	86.6667	56.5511	8.46009	2.64343e-11	1.77347e-07	1.50294e-09	3	3	2	0.25	1			Unknown
OG0000826	53	473	7	565	88.3333	54.4316	9.0441	3.0965e-11	2.07744e-07	1.74575e-09	3	2	2	1	1			Unknown
OG0002375	59	635	1	403	98.3333	38.8247	37.4441	3.34081e-11	2.24135e-07	1.86779e-09	2	2	1	0.5	1	Afu1g17500	Trichodiene synthase (TRI5)	Reference-Containing Family
OG0000957	1	397	59	641	1.66667	61.7534	0.0273663	3.62837e-11	2.43427e-07	2.0118e-09	3	1	3	0.25	1			Unknown
OG0001085	41	270	19	768	68.3333	73.9884	6.13801	3.93392e-11	2.63926e-07	2.16333e-09	3	1	3	0.25	1			Unknown
OG0002893	10	4	50	1034	16.6667	99.6146	51.7	9.44434e-11	6.33621e-07	5.15139e-09	3	2	2	1	1			Unknown
OG0001960	60	695	0	343	100	33.0443	inf	1.21418e-10	8.14592e-07	6.56929e-09	3	3	0	0.25	0.25	Afu2g09420	F-box-like	Reference-Containing Family
OG0000704	57	589	3	449	95	43.2563	14.4839	1.23936e-10	8.31488e-07	6.6519e-09	2	2	1	0.5	1			Unknown
OG0000794	60	697	0	341	100	32.8516	inf	1.27795e-10	8.57376e-07	6.80458e-09	2	2	0	0.5	0.5	Afu3g04290|Afu4g02630|Afu7g07170|Afu8g00330	Chromo (CHRromatin Organisation MOdifier) domain|Reverse transcriptase (RNA-dependent DNA polymerase)|RNase H-like domain found in reverse transcriptase	Reference-Containing Family
OG0003746	57	591	3	447	95	43.0636	14.3706	1.29607e-10	8.69532e-07	6.84671e-09	3	1	3	0.25	1	Afu7g06940	Fungal specific transcription factor domain	Reference-Containing Family
OG0003072	57	592	3	446	95	42.9672	14.3142	1.33963e-10	8.98755e-07	7.02152e-09	3	1	3	0.25	1	Afu7g06960	FAD binding domain	Reference-Containing Family
OG0000931	2	417	58	621	3.33333	59.8266	0.051352	1.69287e-10	1.13575e-06	8.79796e-09	2	1	2	0.5	1		Alcohol dehydrogenase GroES-like domain	Annotated Domain
OG0000494	58	620	2	418	96.6667	40.2697	19.5516	1.70478e-10	1.14373e-06	8.79796e-09	3	1	2	1	1		F-box domain	Annotated Domain
OG0000689	58	627	2	411	96.6667	39.5954	19.0096	1.91422e-10	1.28425e-06	9.75106e-09	3	1	2	1	1		NAD dependent epimerase/dehydratase family	Annotated Domain
OG0000550	49	416	11	622	81.6667	59.9229	6.6604	1.91853e-10	1.28714e-06	9.75106e-09	2	2	1	0.5	1			Unknown
OG0001054	0	332	60	706	0	68.0154	0	2.71813e-10	1.82359e-06	1.37112e-08	2	0	2	0.5	0.5			Unknown
OG0001918	17	37	43	1001	28.3333	96.4355	10.6958	3.56846e-10	2.39408e-06	1.78663e-08	2	1	2	0.5	1			Unknown
OG0000915	47	387	13	651	78.3333	62.7168	6.08169	3.7222e-10	2.49722e-06	1.84979e-08	2	2	1	0.5	1			Unknown
OG0001797	19	51	41	987	31.6667	95.0867	8.96844	4.61386e-10	3.09544e-06	2.27404e-08	2	1	2	0.5	1			Unknown
OG0000753	4	460	56	578	6.66667	55.684	0.0897516	4.64367e-10	3.11544e-06	2.27404e-08	3	2	2	1	1			Unknown
OG0004910	56	581	4	457	93.3333	44.027	11.012	5.15876e-10	3.46101e-06	2.50798e-08	3	2	2	1	1	Afu3g02585		Reference-Containing Family
OG0004308	56	582	4	456	93.3333	43.9306	10.9691	5.40403e-10	3.62556e-06	2.59696e-08	3	2	2	1	1	Afu3g02560		Reference-Containing Family
OG0006217	0	326	60	712	0	68.5934	0	5.41921e-10	3.63575e-06	2.59696e-08	2	0	2	0.5	0.5	Afu4g07450		Reference-Containing Family
OG0000774	54	530	6	508	90	48.9403	8.62642	7.06083e-10	4.73711e-06	3.35965e-08	2	2	1	0.5	1			Unknown
OG0001026	42	312	18	726	70	69.9422	5.42949	7.97488e-10	5.35035e-06	3.76785e-08	3	3	2	0.25	1			Unknown
OG0000734	59	676	1	362	98.3333	34.8748	31.5947	8.49951e-10	5.70232e-06	3.98764e-08	2	2	1	0.5	1	Afu1g00950|Afu7g07090		Reference-Containing Family
OG0001905	16	34	44	1004	26.6667	96.7245	10.738	1.00586e-09	6.74834e-06	4.68635e-08	2	2	2	0.5	0.5			Unknown
OG0003486	17	710	43	328	28.3333	31.5992	0.18264	1.04824e-09	7.03263e-06	4.85009e-08	2	2	2	0.5	0.5	Afu3g13190		Reference-Containing Family
OG0002769	56	587	4	451	93.3333	43.4489	10.7564	1.07577e-09	7.21734e-06	4.90976e-08	3	2	2	1	1	Afu3g02590	Fungal Zn(2)-Cys(6) binuclear cluster domain	Reference-Containing Family
OG0002876	56	587	4	451	93.3333	43.4489	10.7564	1.07577e-09	7.21734e-06	4.90976e-08	3	2	2	1	1	Afu3g02600		Reference-Containing Family
OG0001078	0	315	60	723	0	69.6532	0	1.14822e-09	7.7034e-06	5.205e-08	2	0	2	0.5	0.5		RNase H	Annotated Domain
OG0001251	33	193	27	845	55	81.4066	5.35118	1.38882e-09	9.31758e-06	6.25341e-08	3	3	2	0.25	1			Unknown

## Sheet: cluster3
Orthogroup	Number_pos_present_in	Number_neg_present_in	Number_pos_not_present_in	Number_neg_not_present_in	Sensitivity	Specificity	Odds_ratio	Naive_p	Bonferroni_p	Benjamini_H_p	Max_Pairwise_comparisons	Max_supporting_pairs	Max_opposing_pairs	Best_pairwise_comp_p	Worst_pairwise_comp_p	Af293 Reference	Pfam Domain(s)	Annotation Class
OG0000992	324	49	37	688	89.75069252077562	93.35142469470827	122.95201323772753	4.808204708003736e-177	3.2258245385997063e-173	3.2258245385997063e-173	6	5	3	0.21875000000000003	1			Unknown
OG0000668	33	678	328	59	9.141274238227147	8.005427408412483	0.00875513	8.932140396098833e-174	5.992572991742707e-170	2.9962864958713537e-170	6	3	5	0.21875000000000003	1			Unknown
OG0000550	339	126	22	611	93.90581717451524	82.90366350067842	74.72186147186147	4.164437951808281e-144	2.793921421868176e-140	9.313071406227253e-141	5	3	3	1	1			Unknown
OG0004755	40	645	321	92	11.080332409972298	12.48303934871099	0.017773913883455287	2.6131671700876013e-142	1.7531738544117716e-138	4.382934636029429e-139	5	3	3	1	1	Afu1g16900	Fungal specific transcription factor domain	Reference-Containing Family
OG0003357	27	618	334	119	7.479224376731302	16.14654002713704	0.015565955467705365	1.2646861318799409e-141	8.484779258782523e-138	1.6969558517565046e-138	6	3	4	0.6875000000000002	1	Afu3g00100	Endoribonuclease L-PSP|Flavin containing amine oxidoreductase	Reference-Containing Family
OG0000908	324	118	37	619	89.75069252077562	83.98914518317503	45.93586807146129	1.7807300737869234e-130	1.194691806503647e-126	1.991153010839412e-127	5	3	3	1	1			Unknown
OG0001087	265	44	96	693	73.40720221606648	94.02985074626866	43.4766	7.008864024043451e-122	4.702246873730751e-118	6.717495533901073e-119	5	4	4	0.375	0.375		Ankyrin repeats (3 copies)	Annotated Domain
OG0000862	330	151	31	586	91.41274238227147	79.51153324287652	41.31168553727836	3.5369540111055916e-120	2.3729424460507413e-116	2.9661780575634266e-117	5	5	3	0.0625	1			Unknown
OG0002638	95	684	266	53	26.31578947368421	7.191316146540028	0.027673350041771093	5.9272167521531e-116	3.976569719019515e-112	4.418410798910572e-113	5	3	4	0.375	1	Afu6g14620	Alpha-L-arabinofuranosidase B (ABFB) domain|Alpha-L-arabinofuranosidase B catalytic	Reference-Containing Family
OG0000848	328	156	33	581	90.85872576177285	78.83310719131615	37.017871017871016	1.1833687712052175e-115	7.939221086015804e-112	7.939221086015804e-113	5	5	3	0.0625	1		HNH endonuclease	Annotated Domain
OG0002780	93	680	268	57	25.761772853185594	7.734056987788331	0.029088	8.701073257441285e-115	5.837550048417358e-111	5.306863680379416e-112	5	3	4	0.375	1	Afu6g14630		Reference-Containing Family
OG0001160	240	29	121	708	66.482	96.06512890094979	48.42405243659162	4.7163477815204594e-114	3.1641977266220765e-110	2.6368314388517304e-111	5	4	3	0.375	1			Unknown
OG0000915	310	124	51	613	85.87257617728532	83.17503392130257	30.04901960784314	7.644651170143092e-113	5.128796470049001e-109	3.945228053883847e-110	6	5	2	0.21875000000000003	0.6875000000000002			Unknown
OG0001099	252	46	109	691	69.80609418282549	93.7585	34.729158356601516	1.034860393424722e-109	6.94287837948646e-106	4.9591988424903285e-107	5	5	2	0.0625	1			Unknown
OG0002339	81	653	280	84	22.437673130193904	11.397557666214382	0.0372129	1.1733396576737181e-107	7.871935763332975e-104	5.247957175555317e-105	5	4	3	0.375	1	Afu3g02450		Reference-Containing Family
OG0001185	229	28	132	709	63.43490304709142	96.20081411126186	43.92884199134199	1.744350574462592e-106	1.1702848004069528e-102	7.314280002543455e-104	5	4	3	0.375	1			Unknown
OG0000982	285	96	76	641	78.94736842105263	86.97421981004071	25.0391	4.375260631450848e-105	2.9353623576403734e-101	1.726683739788455e-102	5	3	3	1	1		alpha-L-rhamnosidase|alpha-L-rhamnosidase	Annotated Domain
OG0001049	254	55	107	682	70.3601	92.53731343283582	29.43551401869159	7.192923200858911e-105	4.825732175456244e-101	2.6809623196979133e-102	6	4	3	0.6875000000000002	1		Reverse transcriptase (RNA-dependent DNA polymerase)|Chromo (CHRromatin Organisation MOdifier) domain	Annotated Domain
OG0000973	285	100	76	637	78.94736842105263	86.43147896879239	23.8875	6.430034728321099e-103	4.313910299230626e-99	2.270479104858224e-100	5	3	3	1	1			Unknown
OG0000969	285	101	76	636	78.94736842105263	86.29579375848031	23.613861386138613	2.196581940158716e-102	1.4736868236524826e-98	7.368434118262413e-100	5	3	3	1	1			Unknown
OG0001138	238	44	123	693	65.92797783933518	94.02985074626866	30.475609756097562	1.9956401079543676e-100	1.3388749484265852e-96	6.375594992507549e-98	5	4	3	0.375	1			Unknown
OG0001211	216	30	145	707	59.83379501385041	95.92944369063771	35.106206896551726	2.9308738152463112e-95	1.9663232426487502e-91	8.937832921130683e-93	5	4	3	0.375	1			Unknown
OG0006672	141	703	220	34	39.05817174515235	4.613297150610583	0.030997	7.019103453978296e-95	4.709116507274039e-91	2.0474419596843645e-92	5	2	5	0.0625	1	Afu8g02250		Reference-Containing Family
OG0002375	360	334	1	403	99.723	54.681139755766615	434.37125748502996	2.9420969423395564e-91	1.9738528386156083e-87	8.224386827565035e-89	4	3	1	0.625	0.625	Afu1g17500	Trichodiene synthase (TRI5)	Reference-Containing Family
OG0001134	229	55	132	682	63.43490304709142	92.53731343283582	21.51212121212121	1.9116999358235906e-86	1.282559486944047e-82	5.130237947776188e-84	6	6	1	0.03125	0.21875000000000003			Unknown
OG0000956	275	124	86	613	76.17728531855957	83.17503392130257	15.807858214553638	6.058239313746891e-83	4.064472755592789e-79	1.5632587521510727e-80	5	2	4	0.375	1		Fungal WD-like	Annotated Domain
OG0000824	316	209	45	528	87.53462603878116	71.64179104477611	17.74035087719298	5.718177667081138e-82	3.8363253968447354e-78	1.4208612580906428e-79	6	6	2	0.03125	0.6875000000000002			Unknown
OG0000699	77	591	284	146	21.329639889196674	19.810040705563093	0.0669789	3.23208331431414e-80	2.1684046955733565e-76	7.744302484190559e-78	5	1	5	0.0625	0.375			Unknown
OG0000729	32	482	329	255	8.86427	34.599728629579374	0.0514573	7.436208810142993e-78	4.988952490724934e-74	1.7203284450775636e-75	6	3	5	0.21875000000000003	1		Phosphotransferase enzyme family|Fungal protein kinase|Fungal protein kinase|Protein of unknown function (DUF3435)	Annotated Domain
OG0000013	72	569	289	168	19.94459833795014	22.795115332428765	0.0735583	3.1319506825352406e-75	2.101225712912893e-71	7.004085709709644e-73	5	2	5	0.0625	1		Helicase conserved C-terminal domain|DEAD/DEAH box helicase|Orsellinic acid/F9775 biosynthesis cluster protein D	Annotated Domain
OG0000728	339	296	22	441	93.90581717451524	59.83717774762552	22.957463144963146	1.2037109089839402e-74	8.075696488373255e-71	2.6050633833462113e-72	5	3	5	0.0625	1			Unknown
OG0001532	143	669	218	68	39.612188365650965	9.226594301221166	0.0666749	1.5645789923283571e-71	1.0496760459530948e-67	3.280237643603421e-69	5	3	3	1	1	Afu3g07730		Reference-Containing Family
OG0000689	92	593	269	144	25.48476454293629	19.53867028493894	0.0830507	2.4338251500361014e-70	1.6328532931592205e-66	4.948040282300668e-68	5	2	4	0.375	1		NAD dependent epimerase/dehydratase family	Annotated Domain
OG0000737	333	291	28	446	92.24376731301939	60.51560379918589	18.227540500736378	5.433185074732691e-70	3.6451238666381624e-66	1.0720952548935771e-67	6	5	3	0.21875000000000003	1			Unknown
OG0002264	335	300	26	437	92.7978	59.2944	18.768589743589743	2.3784604734012065e-69	1.5957091316048695e-65	4.559168947442484e-67	6	5	3	0.21875000000000003	1	Afu3g15190	Molydopterin dinucleotide binding domain|Molybdopterin oxidoreductase	Reference-Containing Family
OG0003146	334	297	27	440	92.5208	59.70149253731343	18.32647462277092	3.466077008016273e-69	2.3253910646781176e-65	6.459419624105882e-67	6	5	3	0.21875000000000003	1	Afu3g15170	Probable molybdopterin binding domain|MoeA C-terminal region (domain IV)|MoeA N-terminal region (domain I and II)	Reference-Containing Family
OG0002498	332	293	29	444	91.96675900277008	60.24423337856174	17.34824055549017	1.1050314267568326e-68	7.41365584211159e-65	2.0036907681382675e-66	6	4	4	0.6875000000000002	0.6875000000000002	Afu5g15060		Reference-Containing Family
OG0001030	222	79	139	658	61.495844875346265	89.2809	13.302613605318276	2.2489005353592697e-68	1.5087873691725341e-64	3.9704930767698266e-66	5	5	2	0.0625	1		Reverse transcriptase (RNA-dependent DNA polymerase)	Annotated Domain
OG0000756	325	274	36	463	90.02770083102493	62.822252374491185	15.254967558799676	3.621984106603846e-68	2.42998913712052e-64	6.230741377232102e-66	4	2	3	0.625	1		GMC oxidoreductase|GMC oxidoreductase	Annotated Domain
OG0000747	325	277	36	460	90.02770083102493	62.41519674355496	14.99197753710389	3.197593785354565e-67	2.145265670594378e-63	5.363164176485945e-65	4	2	3	0.625	1			Unknown
OG0000748	326	281	35	456	90.30470914127424	61.87245590230665	15.114997458057957	7.303405486149722e-67	4.899854740657848e-63	1.1950865221116703e-64	4	2	3	0.625	1			Unknown
OG0001236	51	493	310	244	14.127423822714682	33.10719131614654	0.0814238	3.4617003401710014e-65	2.3224547582207247e-61	5.529654186239821e-63	5	1	5	0.0625	0.375	Afu8g06280		Reference-Containing Family
OG0001326	167	28	194	709	46.26038781163435	96.20081411126186	21.797312223858615	8.314796559387927e-65	5.5783970116933605e-61	1.2973016306263629e-62	5	3	3	1	1			Unknown
OG0001075	219	84	142	653	60.664819944598335	88.60244233378562	11.989185110663984	4.942017504018343e-64	3.3155995434459066e-60	7.535453507831606e-62	5	4	3	0.375	1			Unknown
OG0001113	213	77	148	660	59.0028	89.55223880597015	12.335907335907336	7.854126013064865e-64	5.269333142165218e-60	1.1709629204811596e-61	5	3	4	0.375	1			Unknown
OG0000903	269	176	92	561	74.51523545706371	76.11940298507463	9.319972826086957	9.566423880913305e-59	6.4181137817047365e-55	1.3952421264575514e-56	5	2	5	0.0625	1			Unknown
OG0001052	226	106	135	631	62.603878116343495	85.61736770691995	9.965478686233403	1.6757105498319233e-58	1.1242342078822374e-54	2.391987676345186e-56	5	3	4	0.375	1			Unknown
OG0000840	46	457	315	280	12.742382271468145	37.99185888738128	0.0894724	4.221711565957192e-58	2.8323462896006804e-54	5.900721436668084e-56	5	2	5	0.0625	1			Unknown
OG0000905	24	391	337	346	6.6482	46.94708276797829	0.0630203	4.325176020786518e-58	2.901760592345675e-54	5.921960392542194e-56	5	3	3	1	1			Unknown
OG0000601	154	651	207	86	42.65927977839335	11.668928086838534	0.0982806	3.7695794791697014e-56	2.5290108725749528e-52	5.0580217451499055e-54	5	3	3	1	1			Unknown
OG0000745	318	296	43	441	88.08864265927978	59.83717774762552	11.018070395977373	5.289499131698544e-56	3.548724967456553e-52	6.95828424991481e-54	6	2	6	0.03125	0.6875000000000002			Unknown
OG0001212	181	56	180	681	50.13850415512465	92.40162822252374	12.22827380952381	8.540363497602149e-56	5.729729870541282e-52	1.1018711289502466e-53	5	5	1	0.0625	0.375		Reverse transcriptase (RNA-dependent DNA polymerase)|GAG-pre-integrase domain	Annotated Domain
OG0000605	154	648	207	89	42.65927977839335	12.075983717774763	0.10217987713961948	7.479685631041931e-55	5.0181210898660313e-51	9.46815299974723e-53	5	3	3	1	1			Unknown
OG0001592	48	450	313	287	13.29639889196676	38.94165535956581	0.0978062	1.0492140044915301e-54	7.039176756133675e-51	1.303551251135866e-52	5	2	4	0.375	1	Afu8g06165		Reference-Containing Family
OG0003116	177	54	184	683	49.03047091412742	92.67299864314789	12.166968599033817	1.3274241265897743e-54	8.905688465290796e-51	1.6192160845983267e-52	4	3	2	0.625	1	Afu1g01000	2OG-Fe(II) oxygenase superfamily	Reference-Containing Family
OG0001400	144	25	217	712	39.88919667590028	96.6079	18.89917050691244	1.2933692130785502e-53	8.677214050543994e-50	1.549502509025713e-51	6	5	2	0.21875000000000003	0.6875000000000002			Unknown
OG0001204	341	378	20	359	94.45983379501385	48.71099050203528	16.192989417989416	1.579436456522945e-53	1.0596439186812438e-49	1.859024418739024e-51	6	4	4	0.6875000000000002	0.6875000000000002	Afu5g14860|Afu5g15050	Cytochrome P450	Reference-Containing Family
OG0000511	217	711	144	26	60.11080332409973	3.5278154681139755	0.0551063	6.496159686944877e-53	4.358273533971318e-49	7.514264713743651e-51	5	3	4	0.375	1	Afu3g06970	S4 domain|Ribosomal protein S4/S9 N-terminal domain	Reference-Containing Family
OG0003444	173	54	188	683	47.92243767313019	92.67299864314789	11.638987391646966	2.153296794692582e-52	1.444646819559253e-48	2.4485539314563613e-50	5	4	2	0.375	1	Afu1g00930		Reference-Containing Family
OG0006217	11	315	350	422	3.0470914127423825	57.25915875169606	0.042104308390022674	1.2105307536586077e-51	8.121450826295599e-48	1.353575137715933e-49	4	3	2	0.625	1	Afu4g07450		Reference-Containing Family
OG0000695	329	346	32	391	91.13573407202216	53.05291723202171	11.618406791907514	2.5362143228855408e-51	1.7015461892239093e-47	2.7894199823342776e-49	5	5	3	0.0625	1			Unknown
OG0001374	63	474	298	263	17.451523545706372	35.68521031207598	0.117301	6.83612931450058e-51	4.586359157098439e-47	7.39735347919103e-49	5	2	4	0.375	1	Afu7g08610|Afu8g06380	Ankyrin repeats (3 copies)	Reference-Containing Family
OG0001975	21	350	340	387	5.8171745152354575	52.51017639077341	0.0682941	3.3197341082231447e-50	2.2272096132069078e-46	3.535253354296679e-48	4	3	2	0.625	1	Afu1g03310		Reference-Containing Family
OG0001372	146	32	215	705	40.443213296398895	95.65807327001356	14.960755813953488	4.544729463709795e-50	3.049058997202901e-46	4.764154683129533e-48	5	4	4	0.375	0.375			Unknown
OG0000990	234	142	127	595	64.81994459833795	80.7327	7.720416990129755	1.075247478641788e-49	7.213835334207755e-46	1.109820820647347e-47	5	3	5	0.0625	1			Unknown
OG0000847	276	221	85	516	76.45429362880887	70.01356852103122	7.581368112856002	4.543819991331767e-49	3.0484488321844824e-45	4.618861866946185e-47	6	3	5	0.21875000000000003	1			Unknown
OG0001525	125	587	236	150	34.62603878116344	20.352781546811396	0.13534778968036265	4.900915601222459e-48	3.2880242768601476e-44	4.907498920686788e-46	5	4	3	0.375	1	Afu1g13650		Reference-Containing Family
OG0001179	183	75	178	662	50.69252077562327	89.8236	9.074606741573033	7.61390690481731e-48	5.108170142441933e-44	7.512014915355784e-46	5	4	2	0.375	1			Unknown
OG0001078	12	303	349	434	3.3241	58.88738127544097	0.049249624102811425	1.285524759274045e-47	8.624585609969567e-44	1.2499399434738502e-45	5	3	3	1	1		RNase H	Annotated Domain
OG0002991	217	702	144	35	60.11080332409973	4.74898	0.0751326	3.5797707813986477e-47	2.401668217240353e-43	3.430954596057647e-45	5	2	4	0.375	1	Afu6g00193		Reference-Containing Family
OG0000744	309	305	52	432	85.59556786703601	58.61601085481682	8.416645649432535	3.9628439929157715e-47	2.658672034847191e-43	3.7446084997847757e-45	6	4	4	0.6875000000000002	0.6875000000000002			Unknown
OG0000648	341	405	20	332	94.45983379501385	45.047489823609226	13.97679012345679	8.12699101988956e-47	5.452398275243906e-43	7.572775382283202e-45	5	4	2	0.375	1		Glutathione-dependent formaldehyde-activating enzyme	Annotated Domain
OG0003486	337	390	24	347	93.35180055401662	47.08276797829037	12.493482905982907	9.098797977043487e-47	6.1043835627984755e-43	8.362169264107501e-45	5	3	4	0.375	1	Afu3g13190		Reference-Containing Family
OG0002773	343	417	18	320	95.01385041551247	43.419267299864316	14.62296829203304	1.058305718289039e-45	7.100173064001163e-42	9.594828464866436e-44	5	4	2	0.375	1	Afu4g00830	POT family	Reference-Containing Family
OG0001599	250	724	111	13	69.25207756232687	1.7639077340569878	0.040440993479667516	1.3663801007697584e-44	9.167044096064309e-41	1.2222725461419079e-42	5	2	4	0.375	1	Afu3g07400		Reference-Containing Family
OG0001024	85	497	276	240	23.545706371191137	32.56445047489824	0.14871839734056513	6.900276524114621e-44	4.629395520028499e-40	6.09130989477434e-42	5	1	5	0.0625	0.375	Afu8g06132	Protein of unknown function (DUF3435)	Reference-Containing Family
OG0001230	50	411	311	326	13.850415512465375	44.23337856173677	0.1275220816610729	2.587208966192723e-43	1.735758495418698e-39	2.225331404382946e-41	5	2	4	0.375	1	Afu8g06230		Reference-Containing Family
OG0002889	50	411	311	326	13.850415512465375	44.23337856173677	0.1275220816610729	2.587208966192723e-43	1.735758495418698e-39	2.225331404382946e-41	5	2	4	0.375	1	Afu8g06335		Reference-Containing Family
OG0006705	48	406	313	331	13.29639889196676	44.91180461329715	0.12502557484379673	2.98687822853327e-43	2.003896603522971e-39	2.536577979143001e-41	5	2	4	0.375	1	Afu8g06250		Reference-Containing Family
OG0003391	49	408	312	329	13.573407202216067	44.6404	0.1266418426344897	3.915097458407854e-43	2.6266388848458294e-39	3.2832986060572867e-41	5	2	4	0.375	1	Afu8g06370	FAD binding domain	Reference-Containing Family
OG0005240	49	407	312	330	13.573407202216067	44.776119402985074	0.12733887733887733	5.139198801501835e-43	3.4478884759275814e-39	4.256652439416767e-41	5	2	4	0.375	1	Afu8g06320		Reference-Containing Family
OG0005239	48	404	313	333	13.29639889196676	45.1832	0.1264036946825673	7.418321923842682e-43	4.976952178706055e-39	6.069453876470799e-41	5	2	4	0.375	1	Afu8g06270		Reference-Containing Family
OG0004043	50	409	311	328	13.850415512465375	44.50474898236092	0.12893183122508825	1.1488466839692862e-42	7.707612402749941e-39	9.286280003313181e-41	5	2	4	0.375	1	Afu8g06300		Reference-Containing Family
OG0006267	163	629	198	108	45.15235457063712	14.654002713704205	0.1413499060557884	1.4183450539297229e-42	9.51567696681451e-39	1.1328186865255369e-40	5	3	5	0.0625	1	Afu4g11370		Reference-Containing Family
OG0001289	157	57	204	680	43.49030470914128	92.26594301221166	9.181286549707602	2.0249186080948537e-42	1.3585178941708373e-38	1.598256346083338e-40	6	5	3	0.21875000000000003	1			Unknown
OG0002244	52	410	309	327	14.40443213296399	44.36906377204885	0.13421738100876154	1.0518589138574141e-41	7.056921453069391e-38	8.20572261984813e-40	5	2	4	0.375	1	Afu8g06390		Reference-Containing Family
OG0000818	279	257	82	480	77.28531855955679	65.12890094979647	6.354749928822246	5.767352614457135e-41	3.869316869039292e-37	4.447490654068152e-39	6	6	3	0.03125	1			Unknown
OG0000907	48	395	313	342	13.29639889196676	46.404341926729984	0.13277793505075425	1.1298538770750345e-40	7.580189661296407e-37	8.613851887836826e-39	5	2	4	0.375	1			Unknown
OG0000993	263	229	98	508	72.85318559556787	68.9281	5.953301844755369	1.0195213829591103e-39	6.839968958272671e-36	7.685358380081653e-38	5	4	2	0.375	1	Afu4g01115		Reference-Containing Family
OG0000617	163	620	198	117	45.15235457063712	15.87516960651289	0.15535190615835778	1.3222039771356452e-39	8.870666482603044e-36	9.85629609178116e-38	5	5	3	0.0625	1		GAG-pre-integrase domain|Reverse transcriptase (RNA-dependent DNA polymerase)	Annotated Domain
OG0000017	245	713	116	24	67.86703601108033	3.2564450474898234	0.0710935	2.824665532877702e-39	1.8950681060076502e-35	2.082492424184231e-37	5	1	5	0.0625	0.375	Afu1g00230|Afu6g09390|Afu7g08630	Lipopolysaccharide kinase (Kdo/WaaP) family	Reference-Containing Family
OG0000758	267	239	94	498	73.9612	67.57123473541384	5.918543576960741	3.432072789975321e-39	2.302577634794443e-35	2.5028017769504813e-37	4	2	3	0.625	1		Ankyrin repeats (3 copies)|Ankyrin repeats (3 copies)|Ankyrin repeats (3 copies)|Ankyrin repeats (3 copies)	Annotated Domain
OG0001582	99	12	262	725	27.42382271468144	98.37177747625509	22.829198473282442	5.22801743918284e-39	3.5074768999477677e-35	3.771480537578245e-37	5	4	3	0.375	1			Unknown
OG0001756	10	256	351	481	2.7700831024930745	65.26458616010855	0.053530092592592594	7.871310114061919e-39	5.280861955524141e-35	5.617938250557597e-37	5	2	4	0.375	1	Afu4g06430		Reference-Containing Family
OG0000790	86	476	275	261	23.822714681440445	35.41383989145183	0.1714744079449962	4.6749615712430634e-38	3.1364317181469713e-34	3.301507071733654e-36	6	2	6	0.03125	0.6875000000000002		Helix-loop-helix DNA-binding domain	Annotated Domain
OG0001251	158	68	203	669	43.76731301939058	90.77340569877883	7.6573456968994495	4.8773032653773e-38	3.2721827607416308e-34	3.4085237091058656e-36	6	5	4	0.21875000000000003	0.6875000000000002			Unknown
OG0000828	270	250	91	487	74.79224376731301	66.0787	5.7797802197802195	6.628035912147879e-38	4.4467492934600115e-34	4.584277622123723e-36	6	3	6	0.03125	1			Unknown
OG0001401	130	39	231	698	36.011080332409975	94.70827679782904	10.072150072150071	8.140640066717603e-38	5.46155542076084e-34	5.556866232612582e-36	6	5	3	0.21875000000000003	1			Unknown
OG0000702	313	355	48	382	86.70360110803324	51.83175033921302	7.016784037558685	8.199877135618507e-38	5.501297570286456e-34	5.556866232612582e-36	5	3	5	0.0625	1		Nuclear pore complex component	Annotated Domain
OG0000706	286	290	75	447	79.22437673130193	60.651289009497965	5.877793103448276	4.918240104484632e-37	3.2996472860987395e-33	3.2996472860987396e-35	6	2	5	0.21875000000000003	0.6875000000000002	Afu1g16050|Afu5g14950		Reference-Containing Family
OG0001591	96	13	265	724	26.59279778393352	98.23609226594301	20.17532656023222	1.2005081810980259e-36	8.054209386986656e-33	7.974464739590748e-35	5	4	3	0.375	1			Unknown
OG0000779	257	231	104	506	71.19113573407202	68.65671641791045	5.413003663003663	5.1661882408731886e-36	3.465995690801822e-32	3.3980349909821785e-34	6	2	6	0.03125	0.6875000000000002			Unknown
OG0003259	6	221	355	516	1.662049861495845	70.01356852103122	0.039462112038748325	1.375761750626053e-35	9.22998558495019e-32	8.961151053349699e-34	4	2	3	0.625	1	Afu6g11640	Fungal specific transcription factor domain|Fungal Zn(2)-Cys(6) binuclear cluster domain	Reference-Containing Family
OG0000704	117	529	244	208	32.40997229916898	28.222523744911804	0.1885400849112151	1.3912372415493965e-35	9.333810653554902e-32	8.974817936110482e-34	6	3	4	0.6875000000000002	1			Unknown
OG0000906	203	138	158	599	56.232686980609415	81.27544097693351	5.576820766831774	2.0402479035943867e-35	1.368802318521474e-31	1.3036212557347371e-33	6	4	4	0.6875000000000002	0.6875000000000002			Unknown
OG0001960	332	423	29	314	91.96675900277008	42.60515603799186	8.498247330235591	2.27988084638477e-35	1.5295720598395422e-31	1.442992509282587e-33	5	3	4	0.375	1	Afu2g09420	F-box-like	Reference-Containing Family
OG0001288	133	49	228	688	36.84210526315789	93.35142469470827	8.19048	1.7342298638518724e-34	1.1634948156582211e-30	1.0873783323908609e-32	5	4	3	0.375	1			Unknown
OG0001578	96	16	265	721	26.59279778393352	97.82903663500679	16.324528301886794	1.93811345469049e-34	1.3002803167518498e-30	1.2039632562517127e-32	6	4	3	0.6875000000000002	1			Unknown
OG0000334	323	400	38	337	89.47368421052632	45.725915875169605	7.16125	2.674138391828737e-34	1.7940794470778996e-30	1.6459444468604583e-32	4	2	3	0.625	1			Unknown
OG0001590	93	15	268	722	25.761772853185594	97.96472184531886	16.702985074626866	1.2372541662951062e-33	8.300738201673867e-30	7.546125637885334e-32	6	5	2	0.21875000000000003	0.6875000000000002			Unknown
OG0001020	34	321	327	416	9.418282548476455	56.44504748982361	0.13474711099678946	1.978282388862244e-33	1.3272296546876795e-29	1.195702391610522e-31	6	4	4	0.6875000000000002	0.6875000000000002			Unknown
OG0001214	8	217	353	520	2.21607	70.5563	0.054307385021083274	2.048149155019597e-32	1.3741032681026478e-28	1.2268779179487926e-30	5	2	4	0.375	1		RNase H	Annotated Domain
OG0000955	46	350	315	387	12.742382271468145	52.51017639077341	0.16146938775510203	3.6081630282848574e-32	2.420716575676311e-28	2.142227058120629e-30	6	4	4	0.6875000000000002	0.6875000000000002			Unknown
OG0000944	48	355	313	382	13.29639889196676	51.83175033921302	0.16501822436214733	5.825101520060577e-32	3.9080606098086406e-28	3.428123341937404e-30	5	2	4	0.375	1		Reverse transcriptase (RNA-dependent DNA polymerase)	Annotated Domain
OG0001224	11	228	350	509	3.0470914127423825	69.06377204884667	0.0701629	6.257984187377603e-32	4.198481591311634e-28	3.650853557662291e-30	4	3	2	0.625	1			Unknown
OG0000814	345	490	16	247	95.56786703601108	33.51424694708277	10.869260204081632	1.6630032372438808e-31	1.1157088718669197e-27	9.618179929887238e-30	5	3	3	1	1	Afu3g03750		Reference-Containing Family
OG0000795	95	466	266	271	26.31578947368421	36.77069199457259	0.2076946658491723	3.2249730255744475e-31	2.1636344028578967e-27	1.8492601733828178e-29	6	2	6	0.03125	0.6875000000000002	Afu3g06901	SecE/Sec61-gamma subunits of protein translocation complex	Reference-Containing Family
OG0001001	38	322	323	415	10.526315789473683	56.30936227951153	0.1516258677383997	3.2987641549892487e-31	2.213140871582287e-27	1.875543111510413e-29	5	3	4	0.375	1		Patatin-like phospholipase	Annotated Domain
OG0001200	13	233	348	504	3.6011080332409975	68.3853	0.0808051	3.8383803505659168e-31	2.5751693771946734e-27	2.164007879995524e-29	4	3	2	0.625	1			Unknown
OG0001201	12	226	349	511	3.3241	69.33514246947082	0.0777443	1.2516453843374266e-30	8.397288883519795e-27	6.997740736266496e-29	5	3	3	1	1			Unknown
OG0000764	82	433	279	304	22.71468144044321	41.2483	0.20634565877805094	2.5661404281478998e-30	1.721623613244426e-26	1.4228294324334098e-28	6	4	4	0.6875000000000002	0.6875000000000002			Unknown
OG0001342	131	58	230	679	36.288088642659275	92.13025780189959	6.66784	8.826747107076012e-30	5.921864634137296e-26	4.853987405030571e-28	6	5	3	0.21875000000000003	1			Unknown
OG0000709	210	171	151	566	58.17174515235457	76.79782903663501	4.603229929127455	1.4524493312970095e-29	9.744482563671637e-26	7.9223435477005185e-28	5	4	3	0.375	1		RNase H-like domain found in reverse transcriptase|Chromo (CHRromatin Organisation MOdifier) domain|Integrase zinc binding domain	Annotated Domain
OG0000935	51	351	310	386	14.127423822714682	52.37449118046133	0.18092087124345188	1.7463142815249872e-29	1.171602251475114e-25	9.448405253831564e-28	4	2	3	0.625	1			Unknown
OG0001465	106	33	255	704	29.362880886426595	95.52238805970148	8.86797	1.992918780932512e-29	1.3370492101276223e-25	1.0696393681020978e-27	4	3	2	0.625	1		Amino acid permease	Annotated Domain
OG0000659	80	423	281	314	22.160664819944596	42.60515603799186	0.21133573946476195	2.544128717308319e-29	1.706855956442151e-25	1.3546475844778977e-27	5	4	4	0.375	0.375		Orsellinic acid/F9775 biosynthesis cluster protein D|DEAD/DEAH box helicase|Helicase conserved C-terminal domain	Annotated Domain
OG0000951	50	346	311	391	13.850415512465375	53.05291723202171	0.181681	5.236234521453648e-29	3.512989740443252e-25	2.7661336538923245e-27	5	2	4	0.375	1	Afu8g06260		Reference-Containing Family
OG0000765	257	263	104	474	71.19113573407202	64.31478968792402	4.453714536414156	6.71122713473342e-29	4.502562284692651e-25	3.517626784916134e-27	5	3	3	1	1			Unknown
OG0001011	121	508	240	229	33.51800554016621	31.071913161465396	0.2272719816272966	7.860460297362801e-29	5.273582813500703e-25	4.088048692636204e-27	5	2	4	0.375	1	Afu8g06170		Reference-Containing Family
OG0001513	99	28	262	709	27.42382271468144	96.20081411126186	9.568020719738277	1.0284746615079245e-28	6.900036504056665e-25	5.307720387735896e-27	5	4	2	0.375	1			Unknown
OG0000864	243	236	118	501	67.31301939058172	67.97829036635007	4.371696351623097	1.254539835401356e-28	8.416707755707699e-25	6.424967752448625e-27	6	3	5	0.21875000000000003	1		Domain of unknown function (DUF4470)|MYND finger	Annotated Domain
OG0003072	128	521	233	216	35.45706371191136	29.30800542740841	0.2277561309136441	1.3850380421716837e-28	9.292220224929826e-25	7.03956077646199e-27	5	5	2	0.0625	1	Afu7g06960	FAD binding domain	Reference-Containing Family
OG0001058	30	283	331	454	8.310249307479225	61.601085481682496	0.14539942139143616	1.5605065572997003e-28	1.0469438492923689e-24	7.871758265356157e-27	5	5	3	0.0625	1			Unknown
OG0003746	128	520	233	217	35.45706371191136	29.443690637720486	0.22925057774843183	1.6092905683178e-28	1.079673042284412e-24	8.057261509585164e-27	5	5	2	0.0625	1	Afu7g06940	Fungal specific transcription factor domain	Reference-Containing Family
OG0000518	240	686	121	51	66.482	6.919945725915875	0.14745921981543503	4.924171822572201e-28	3.30362687576369e-24	2.4471310190842147e-26	5	4	3	0.375	1			Unknown
OG0000957	52	346	309	391	14.40443213296399	53.05291723202171	0.19017153974222273	6.473398224741732e-28	4.343002868979228e-24	3.1933844624847265e-26	6	4	4	0.6875000000000002	0.6875000000000002			Unknown
OG0000810	333	464	28	273	92.24376731301939	37.04206241519674	6.997306034482759	7.9907829872620845e-28	5.361016306154133e-24	3.913150588433674e-26	5	4	3	0.375	1	Afu5g06900		Reference-Containing Family
OG0006260	275	718	86	19	76.17728531855957	2.578018995929444	0.0846181	1.2710502870804032e-27	8.527476376022425e-24	6.179330707262627e-26	4	2	3	0.625	1	Afu4g11120		Reference-Containing Family
OG0001299	134	68	227	669	37.119113573407205	90.77340569877883	5.807592640580461	2.1802766020611993e-27	1.4627475723228585e-23	1.0523363829660853e-25	5	4	4	0.375	0.375			Unknown
OG0000590	199	631	162	106	55.124653739612185	14.382632293080055	0.2063547964234705	4.570765920133547e-27	3.0665268558175967e-23	2.1903763255839974e-25	5	3	5	0.0625	1			Unknown
OG0000947	55	349	306	388	15.23545706371191	52.645861601085485	0.19982396014757384	5.108125848886853e-27	3.4270416320181897e-23	2.4305259801547443e-25	5	4	3	0.375	1			Unknown
OG0003390	82	416	279	321	22.71468144044321	43.55495251017639	0.2267886683209264	7.266062964157683e-27	4.8748016426533894e-23	3.4329589032770348e-25	5	1	5	0.0625	0.375	Afu8g06350	GDSL-like Lipase/Acylhydrolase family	Reference-Containing Family
OG0005808	337	483	24	254	93.35180055401662	34.464	7.384230503795721	9.322817713066401e-27	6.254678403696248e-23	4.373900981605768e-25	6	4	4	0.6875000000000002	0.6875000000000002	Afu2g08680		Reference-Containing Family
OG0000710	48	326	313	411	13.29639889196676	55.76662143826323	0.19333973617671849	2.479381944613889e-26	1.6634173466414582e-22	1.1551509351676793e-24	5	2	4	0.375	1		AMP-binding enzyme|Helicase conserved C-terminal domain|SNF2-related domain|Phosphopantetheine attachment site|Condensation domain	Annotated Domain
OG0001346	125	63	236	674	34.62603878116344	91.45183175033921	5.666532149582997	1.8721735010983746e-25	1.2560412018868995e-21	8.662353116461375e-24	5	4	3	0.375	1			Unknown
OG0000685	149	544	212	193	41.27423822714682	26.187245590230663	0.2493496809100999	2.384323531320353e-25	1.5996426571628247e-21	1.0956456555909758e-23	5	3	5	0.0625	1			Unknown
OG0002063	215	647	146	90	59.556786703601105	12.211668928086839	0.2048442760051661	2.4174848297025915e-25	1.6218905722474686e-21	1.1033269198962371e-23	5	2	4	0.375	1	Afu3g03340		Reference-Containing Family
OG0001900	274	713	87	24	75.90027700831024	3.2564450474898234	0.10601151037384533	2.6187714298229753e-25	1.7569337522682343e-21	1.1871174001812394e-23	6	3	4	0.6875000000000002	1	Afu3g03695		Reference-Containing Family
OG0001506	179	139	182	598	49.584487534626035	81.13975576662143	4.2312435765673175	4.819160062900065e-25	3.2331744861996535e-21	2.169915762550103e-23	5	3	4	0.375	1	Afu1g01070		Reference-Containing Family
OG0001636	79	19	282	718	21.88365650969529	97.42198100407056	10.58641284061217	2.2564898986013267e-24	1.5138790729716302e-20	1.0092527153144201e-22	5	4	2	0.375	1		Reverse transcriptase (RNA-dependent DNA polymerase)|RNase H-like domain found in reverse transcriptase	Annotated Domain
OG0001395	3	149	358	588	0.8310249307479225	79.78290366350068	0.0330696	3.2512340978349682e-24	2.18125295623748e-20	1.4445383816142252e-22	5	1	4	0.375	0.375			Unknown
OG0000996	50	318	311	419	13.850415512465375	56.852103120759836	0.21183441525612248	6.874963202725974e-24	4.612412812708856e-20	3.0344821136242474e-22	6	6	2	0.03125	0.6875000000000002			Unknown
OG0000846	87	411	274	326	24.099722991689752	44.23337856173677	0.2518514571900474	8.63330270995807e-24	5.792082788110869e-20	3.785675024909065e-22	6	3	5	0.21875000000000003	1			Unknown
OG0001430	3	146	358	591	0.8310249307479225	80.19	0.0339213	1.1322707150616131e-23	7.596404227348363e-20	4.932730017758677e-22	5	1	4	0.375	0.375			Unknown
OG0001349	9	177	352	560	2.4930747922437675	75.98371777476255	0.0808937	1.5670206767070557e-23	1.0513141720027636e-19	6.782672077437185e-22	4	2	2	1	1			Unknown
OG0000981	200	182	161	555	55.4017	75.30529172320217	3.7881373285099995	3.5263324050920466e-23	2.365816410576254e-19	1.5165489811386243e-21	5	3	4	0.375	1			Unknown
OG0000535	350	554	11	183	96.95290858725761	24.830393487109905	10.510338037413849	5.204246301318929e-23	3.4915288435548693e-19	2.2239037220094707e-21	5	2	5	0.0625	1	Afu5g12130	Ras family	Reference-Containing Family
OG0001183	24	233	337	504	6.6482	68.3853	0.15404796169177673	5.476352377868837e-23	3.674084810312203e-19	2.3253701331089894e-21	6	4	3	0.6875000000000002	1			Unknown
OG0000610	327	471	34	266	90.58171745152355	36.092265943012215	5.431622330460847	6.367520897992999e-23	4.271969770463503e-19	2.6867734405430837e-21	5	3	4	0.375	1			Unknown
OG0001056	180	150	181	587	49.86149584487535	79.6472	3.8917127071823203	7.862810762328457e-23	5.275159740446162e-19	3.2969748377788516e-21	6	2	6	0.03125	0.6875000000000002			Unknown
OG0001459	3	141	358	596	0.8310249307479225	80.86838534599728	0.0354214	1.3978180903300757e-22	9.377961568024477e-19	5.824820849704644e-21	5	3	4	0.375	1			Unknown
OG0001068	353	571	8	166	97.78393351800554	22.523744911804613	12.827933450087565	2.3080161051126896e-22	1.5484480049201034e-18	9.55832101802533e-21	5	3	3	1	1	Afu5g00450	Carboxylesterase family	Reference-Containing Family
OG0001356	2	132	359	605	0.554017	82.08955223880598	0.0255339	3.2523242634625233e-22	2.181984348357007e-18	1.3386407045135012e-20	5	2	3	1	1			Unknown
OG0000966	259	301	102	436	71.74515235457064	59.158751696065124	3.6780665754673962	3.623030203123222e-22	2.4306909632753697e-18	1.482128636143518e-20	5	2	5	0.0625	1	Afu1g00570|Afu1g00940|Afu7g07110|Afu7g08410	DDE superfamily endonuclease	Reference-Containing Family
OG0001329	12	183	349	554	3.3241	75.1696	0.10409131476349288	3.9331262879999843e-22	2.6387344266191896e-18	1.599232985829812e-20	5	4	3	0.375	1			Unknown
OG0001384	112	60	249	677	31.024930747922436	91.85888738127545	5.0752342704149935	2.8249985265513527e-21	1.8952915114633024e-17	1.1374366291625698e-19	6	5	2	0.21875000000000003	0.6875000000000002			Unknown
OG0001363	10	169	351	568	2.7700831024930745	77.06919945725916	0.0957535	2.831300001045598e-21	1.8995191707014918e-17	1.1374366291625698e-19	5	4	3	0.375	1			Unknown
OG0000577	336	510	25	227	93.07479224376732	30.800542740841248	5.982117647058823	2.982348325329975e-21	2.0008574914638802e-17	1.1909866020618334e-19	6	4	4	0.6875000000000002	0.6875000000000002			Unknown
OG0001192	25	226	336	511	6.9252077562326875	69.33514246947082	0.16823377581120944	5.3554175799695836e-21	3.592949654401594e-17	2.126005712663665e-19	6	4	5	0.21875000000000003	0.6875000000000002			Unknown
OG0000622	320	461	41	276	88.64265927977839	37.44911804613297	4.672768636580075	6.8896625988986e-21	4.62227463760107e-17	2.718985080941806e-19	5	5	3	0.0625	1			Unknown
OG0000053	349	561	12	176	96.67590027700831	23.88059701492537	9.124183006535947	7.686000083105742e-21	5.156537455755642e-17	3.0155189799740596e-19	5	4	3	0.375	1			Unknown
OG0000808	253	298	108	439	70.08310249307479	59.56580732700135	3.4510004971414365	1.708233102754353e-20	1.1460535886378954e-16	6.663102259522648e-19	6	6	3	0.03125	1			Unknown
OG0001074	42	275	319	462	11.634349030470915	62.68656716417911	0.22119122257053292	2.8647140935157187e-20	1.9219366853396956e-16	1.1109460608899974e-18	6	4	3	0.6875000000000002	1			Unknown
OG0000817	106	433	255	304	29.362880886426595	41.2483	0.291844	3.174289258365733e-20	2.1296306634375703e-16	1.2239256686422818e-18	6	3	5	0.21875000000000003	1			Unknown
OG0001369	11	168	350	569	3.0470914127423825	77.20488466757124	0.10644557823129251	3.653801461164006e-20	2.4513354002949315e-16	1.400763085882818e-18	5	4	3	0.375	1			Unknown
OG0001355	12	172	349	565	3.3241	76.66214382632293	0.11294729126407677	4.5345041525276853e-20	3.042198835930824e-16	1.7285220658697865e-18	4	3	2	0.625	1			Unknown
OG0000757	267	332	94	405	73.9612	54.95251017639078	3.464976928992566	4.6902262520927527e-20	3.1466727925290276e-16	1.7777812387169646e-18	5	5	2	0.0625	1		Yos1-like	Annotated Domain
OG0001504	3	127	358	610	0.8310249307479225	82.76797829036636	0.040249857036026924	5.96929624041501e-20	4.00480084769443e-16	2.249888116682264e-18	4	3	2	0.625	1			Unknown
OG0000975	60	322	301	415	16.62049861495845	56.30936227951153	0.2569076164338334	6.263956327762219e-20	4.202488300295673e-16	2.3477588269808228e-18	6	3	6	0.03125	1			Unknown
OG0000642	293	394	68	343	81.16343490304709	46.54002713704206	3.751082412660496	6.681522531232124e-20	4.482633466203632e-16	2.4903519256686843e-18	5	4	3	0.375	1			Unknown
OG0000857	85	383	276	354	23.545706371191137	48.032564450474894	0.2846520603927801	8.23554892029491e-20	5.525229770625855e-16	3.0526131329424613e-18	5	4	3	0.375	1			Unknown
OG0001575	25	219	336	518	6.9252077562326875	70.28493894165535	0.17598934550989345	9.470224259798118e-20	6.353573455898558e-16	3.490974426317889e-18	5	4	3	0.375	1	Afu8g06150		Reference-Containing Family
OG0002980	258	683	103	54	71.46814404432132	7.327001356852103	0.19804119461541742	9.886325273153727e-20	6.632735625758836e-16	3.624445697135976e-18	5	4	3	0.375	1	Afu3g09120		Reference-Containing Family
OG0000245	208	615	153	122	57.61772853185596	16.55359565807327	0.26968489292736064	1.2988252191924248e-19	8.713818395561978e-16	4.735770867153249e-18	6	4	4	0.6875000000000002	0.6875000000000002			Unknown
OG0000038	169	551	192	186	46.81440443213297	25.237449118046136	0.2971302177858439	1.6780194097675152e-19	1.125783222013026e-15	6.0853147135839246e-18	5	4	4	0.375	0.375	Afu5g15090|Afu5g15130		Reference-Containing Family
OG0001818	56	10	305	727	15.512465373961218	98.64314789687924	13.348196721311476	2.8570564680722093e-19	1.9167991844296453e-15	1.0305371959299169e-17	5	3	3	1	1			Unknown
OG0001008	177	162	184	575	49.03047091412742	78.01899592944369	3.4143518518518516	3.475541644758752e-19	2.3317408894686467e-15	1.2469202617479395e-17	5	3	4	0.375	1	Afu1g00890|Afu1g01090	Protein of unknown function (DUF3435)	Reference-Containing Family
OG0000775	87	383	274	354	24.099722991689752	48.032564450474894	0.2934763964856778	5.114344979158241e-19	3.431214046517264e-15	1.8251138545304596e-17	5	2	4	0.375	1			Unknown
OG0001358	13	170	348	567	3.6011080332409975	76.93351424694708	0.12459432048681542	5.248375327395263e-19	3.521135007149482e-15	1.8630343953171863e-17	4	3	2	0.625	1			Unknown
OG0000523	251	672	110	65	69.52908587257618	8.819538670284938	0.2207115800865801	5.826366526488108e-19	3.908909302620872e-15	2.0573206855899326e-17	5	3	4	0.375	1		Transmembrane amino acid transporter protein	Annotated Domain
OG0001499	4	127	357	610	1.10803	82.76797829036636	0.0538168	7.637061127134846e-19	5.123704310194768e-15	2.6825677016726536e-17	4	3	2	0.625	1			Unknown
OG0000887	83	372	278	365	22.99168975069252	49.525101763907735	0.2929430649029164	1.1050797784177553e-18	7.41398023340472e-15	3.861448038231625e-17	5	3	4	0.375	1			Unknown
OG0000800	115	443	246	294	31.855955678670362	39.89145183175034	0.31024610471838354	1.1702625724486104e-18	7.851291598557728e-15	4.068026735004004e-17	6	4	5	0.21875000000000003	0.6875000000000002			Unknown
OG0000754	264	334	97	403	73.13019390581718	54.681139755766615	3.2839064139761716	1.557194016585621e-18	1.044721465727293e-14	5.3851621944705827e-17	5	3	4	0.375	1		Beta-ketoacyl synthase C-terminal domain|Acyl transferase domain|Beta-ketoacyl synthase N-terminal domain	Annotated Domain
OG0000897	216	235	145	502	59.83379501385041	68.11397557666214	3.1821570066030813	1.786017345739477e-18	1.1982390372566152e-14	6.14481557567495e-17	6	5	4	0.21875000000000003	0.6875000000000002			Unknown
OG0001161	31	230	330	507	8.587257617728532	68.79240162822252	0.20707509881422925	1.922060685509232e-18	1.2895105139081436e-14	6.57913527504155e-17	5	4	3	0.375	1			Unknown
OG0000616	317	469	44	268	87.81163434903047	36.36363636363637	4.116883116883117	2.5993128121778933e-18	1.7438789656901486e-14	8.852177490812938e-17	5	1	5	0.0625	0.375			Unknown
OG0001228	25	209	336	528	6.9252077562326875	71.64179104477611	0.18796992481203006	2.8162914114705114e-18	1.889449907955566e-14	9.542676302805889e-17	5	3	3	1	1		Major Facilitator Superfamily	Annotated Domain
OG0000778	259	325	102	412	71.74515235457064	55.902306648575305	3.2189441930618403	3.3129193647886708e-18	2.2226376018367193e-14	1.116903317505889e-16	6	3	5	0.21875000000000003	1			Unknown
OG0001153	33	235	328	502	9.141274238227147	68.11397557666214	0.21491956408925791	3.86373560470476e-18	2.5921802171964236e-14	1.2960901085982117e-16	5	4	3	0.375	1			Unknown
OG0002192	35	0	326	737	9.695290858725762	100	inf	3.888244746474274e-18	2.6086234004095903e-14	1.2978225872684528e-16	3	3	0	0.25	0.25			Unknown
OG0000988	61	313	300	424	16.897506925207757	57.53052917232022	0.2754419595314164	5.668869921254518e-18	3.8032448301696557e-14	1.8827944703810178e-16	6	5	3	0.21875000000000003	1			Unknown
OG0001549	3	116	358	621	0.8310249307479225	84.26051560379919	0.0448613	6.904577396219388e-18	4.632280975123587e-14	2.281911810405708e-16	4	2	3	0.625	1			Unknown
OG0001881	50	8	311	729	13.850415512465375	98.9145	14.65032154340836	7.504720543021315e-18	5.0349170123130004e-14	2.4680965746632355e-16	5	3	3	1	1			Unknown
OG0000681	292	405	69	332	80.88642659279779	45.047489823609226	3.4691000178922886	1.0991160325107586e-17	7.373969462114679e-14	3.5970582742022826e-16	5	4	3	0.375	1			Unknown
OG0002159	34	0	327	737	9.418282548476455	100	inf	1.2651658746937374e-17	8.487997853320284e-14	4.120387307437031e-16	3	3	0	0.25	0.25		Ice-binding-like	Annotated Domain
OG0000913	79	355	282	382	21.88365650969529	51.83175033921302	0.3014484067525722	1.2865164612904957e-17	8.631238938797936e-14	4.152167752063578e-16	5	4	3	0.375	1			Unknown
OG0002117	184	182	177	555	50.96952908587258	75.30529172320217	3.1700502886943567	1.2873019711271786e-17	8.636508924292242e-14	4.152167752063578e-16	5	3	4	0.375	1	Afu1g01080		Reference-Containing Family
OG0001577	77	32	284	705	21.329639889196674	95.65807327001356	5.973261443661972	1.7455836641255594e-17	1.1711120802618377e-13	5.603407082592525e-16	4	3	2	0.625	1			Unknown
OG0001119	40	251	321	486	11.080332409972298	65.94301221166893	0.241278	2.0481703190258057e-17	1.374117467034413e-13	6.543416509687681e-16	6	4	3	0.6875000000000002	1			Unknown
OG0000608	318	479	43	258	88.08864265927978	35.00678426051561	3.9832985386221296	4.4491676061186836e-17	2.984946546945025e-13	1.4146666099265521e-15	6	2	6	0.03125	0.6875000000000002		Pyridine nucleotide-disulphide oxidoreductase|FAD binding domain	Annotated Domain
OG0001373	108	70	253	667	29.916897506925206	90.50203527815468	4.067532467532468	7.602463018634571e-17	5.100492439201934e-13	2.4058926600009124e-15	4	3	3	0.625	0.625			Unknown
OG0001218	29	213	332	524	8.033240997229916	71.09905020352781	0.21488771989365915	1.12325096091363e-16	7.535890696769543e-13	3.5379768529434476e-15	5	4	3	0.375	1			Unknown
OG0004026	356	617	5	120	98.61495844875347	16.28222523744912	13.847649918962723	1.453494410420327e-16	9.751493999509974e-13	4.5567728969672775e-15	3	2	2	1	1	Afu7g00560	Fungal fruit body lectin	Reference-Containing Family
OG0001166	126	96	235	641	34.903047091412745	86.97421981004071	3.5800531914893616	1.733470860355626e-16	1.1629856002125894e-12	5.409235349825997e-15	4	3	2	0.625	1			Unknown
OG0001202	31	216	330	521	8.587257617728532	70.69199457259158	0.22658529741863076	3.8577850876021683e-16	2.5881880152722948e-12	1.198235192255692e-14	5	3	4	0.375	1			Unknown
OG0001092	46	258	315	479	12.742382271468145	64.9932	0.2711209548418851	7.467892557554694e-16	5.0102091168634446e-12	2.3088521275868408e-14	5	4	3	0.375	1			Unknown
OG0000560	237	641	124	96	65.65096952908587	13.025780189959294	0.28624628856121986	9.998170083679835e-16	6.707772309140802e-12	3.07695977483523e-14	6	3	5	0.21875000000000003	1		Serine hydrolase (FSH1)	Annotated Domain
OG0000574	330	524	31	213	91.41274238227147	28.900949796472187	4.327136173356316	1.0811510572200317e-15	7.253442442889193e-12	3.30043024942872e-14	5	4	4	0.375	0.375			Unknown
OG0001596	360	646	1	91	99.723	12.347354138398913	50.71207430340557	1.0822695705385577e-15	7.2609465487431836e-12	3.30043024942872e-14	3	2	1	1	1	Afu5g09770		Reference-Containing Family
OG0000942	224	268	137	469	62.04986149584487	63.63636363636363	2.8613138686131387	1.1943508155711631e-15	8.012899621666933e-12	3.6257464351434085e-14	5	2	5	0.0625	1	Afu1g00550|Afu1g00910		Reference-Containing Family
OG0001550	5	114	356	623	1.3850415512465373	84.53188602442334	0.0767544	1.409178854208274e-15	9.45418093288331e-12	4.258640059857347e-14	5	3	4	0.375	1		Ankyrin repeat	Annotated Domain
OG0000460	183	553	178	184	50.69252077562327	24.96607869742198	0.3420769246398602	2.1185492910388413e-15	1.4213347193579586e-11	6.373698293085017e-14	5	1	5	0.0625	0.375		Phosphotransferase enzyme family	Annotated Domain
OG0000752	206	235	155	502	57.06371191135734	68.11397557666214	2.8390391214824984	2.28354051893945e-15	1.5320273341564767e-11	6.839407741769986e-14	6	3	5	0.21875000000000003	1			Unknown
OG0000561	335	542	26	195	92.7978	26.45861601085482	4.635608856088561	2.313752119283707e-15	1.552296296827439e-11	6.899094652566395e-14	5	3	3	1	1			Unknown
OG0001054	167	165	194	572	46.26038781163435	77.61194029850746	2.984192439862543	2.3285266319299196e-15	1.5622085173617832e-11	6.912427067972492e-14	6	4	3	0.6875000000000002	1			Unknown
OG0005191	361	656	0	81	100	10.990502035278155	inf	2.4939312773373795e-15	1.673178493965648e-11	7.370830369892722e-14	2	2	0	0.5	0.5	Afu6g11950		Reference-Containing Family
OG0000899	87	359	274	378	24.099722991689752	51.28900949796472	0.3343228351259582	2.5843256965899755e-15	1.7338241098422144e-11	7.604491709834273e-14	6	4	4	0.6875000000000002	0.6875000000000002			Unknown
OG0000521	256	665	105	72	70.91412742382272	9.76934	0.26397422126745435	3.004617940731838e-15	2.0157981764369902e-11	8.802612124178997e-14	5	3	5	0.0625	1	Afu4g09870	Cytochrome c oxidase subunit VII	Reference-Containing Family
OG0000670	291	420	70	317	80.60941828254848	43.01221166892809	3.1376530612244897	3.590171910977013e-15	2.4086463350744782e-11	1.0472375369889035e-13	6	3	5	0.21875000000000003	1			Unknown
OG0002175	34	2	327	735	9.418282548476455	99.72862957937585	38.211009174311926	3.920837517531936e-15	2.630489890512176e-11	1.1387402123429333e-13	4	3	2	0.625	1			Unknown
OG0001281	25	190	336	547	6.9252077562326875	74.21981004070555	0.21420739348370926	4.372643770870606e-15	2.9336067058770895e-11	1.2644856490849525e-13	6	3	5	0.21875000000000003	1			Unknown
OG0005713	257	665	104	72	71.19113573407202	9.76934	0.2675534991324465	5.7724761885149735e-15	3.8727542748746954e-11	1.662126298229483e-13	5	3	3	1	1	Afu2g00850		Reference-Containing Family
OG0001675	1	87	360	650	0.2770083102493075	88.19538670284939	0.020753512132822477	6.163605998419764e-15	4.1351632643398196e-11	1.76716378817941e-13	4	1	3	0.625	0.625			Unknown
OG0001243	29	201	332	536	8.033240997229916	72.72727272727273	0.23293172690763053	7.0576583851214995e-15	4.7349830105780137e-11	2.0148863874800057e-13	5	3	4	0.375	1		SMODS and SLOG-associating 2TM effector domain	Annotated Domain
OG0000834	229	283	132	454	63.43490304709142	61.601085481682496	2.7831138237498663	7.150811560139534e-15	4.797479475697613e-11	2.032830286312548e-13	6	6	2	0.03125	0.6875000000000002			Unknown
OG0001518	7	118	354	619	1.9390581717451523	83.98914518317503	0.10372977113856172	1.679155010841719e-14	1.1265450967737092e-10	4.753354838707633e-13	4	3	2	0.625	1			Unknown
OG0000895	168	172	193	565	46.53739612188366	76.66214382632293	2.859380648270876	1.9995733455816366e-14	1.34151375755072e-10	5.636612426683697e-13	6	3	4	0.6875000000000002	1		Protein of unknown function (DUF3723)|Protein kinase domain	Annotated Domain
OG0001856	48	13	313	724	13.29639889196676	98.23609226594301	8.540673384123863	5.0188781088827035e-14	3.367165323249406e-10	1.4088557837863622e-12	6	4	4	0.6875000000000002	0.6875000000000002			Unknown
OG0001237	24	179	337	558	6.6482	75.7123	0.22200487376290967	6.103791982137602e-14	4.095034040816117e-10	1.7062641836733821e-12	6	4	3	0.6875000000000002	1			Unknown
OG0001515	8	119	353	618	2.21607	83.85345997286295	0.11769466993596306	6.65174972001846e-14	4.462658887160385e-10	1.8517256793196617e-12	5	4	3	0.375	1			Unknown
OG0001611	4	99	357	638	1.10803	86.56716417910447	0.0722067	7.40032681483332e-14	4.964879260071674e-10	2.0516030000296173e-12	3	1	2	1	1			Unknown
OG0001510	167	515	194	222	46.26038781163435	30.12211668928087	0.3710739665699129	7.825328362716411e-14	5.250012798546441e-10	2.1604990940520332e-12	4	2	3	0.625	1	Afu6g09400		Reference-Containing Family
OG0001338	108	82	253	655	29.916897506925206	88.87381275440977	3.4098139400366336	8.662830730321659e-14	5.811893136972801e-10	2.3819234167921315e-12	6	5	2	0.21875000000000003	0.6875000000000002			Unknown
OG0001674	2	87	359	650	0.554017	88.19538670284939	0.041622642717638395	9.810626259402064e-14	6.581949157432845e-10	2.6865098601766713e-12	4	2	3	0.625	1		Protein of unknown function (DUF3435)	Annotated Domain
OG0001787	53	18	308	719	14.681440443213297	97.55766621438264	6.873556998556999	1.0163783128610212e-13	6.818882100984591e-10	2.7719032930831672e-12	4	3	2	0.625	1			Unknown
OG0000595	319	505	42	232	88.36565096952909	31.47896879240163	3.4892975011786893	1.0567373183365855e-13	7.089650668720152e-10	2.8703039144616e-12	5	4	3	0.375	1		EamA-like transporter family	Annotated Domain
OG0001601	161	502	200	235	44.59833795013851	31.886024423337854	0.3768426294820717	1.2907365327720046e-13	8.65955139836738e-10	3.4917545961158787e-12	4	1	4	0.125	0.625	Afu6g09307	Glycosyl hydrolases family 18|Chitin recognition protein	Reference-Containing Family
OG0000643	300	454	61	283	83.10249307479224	38.398914518317504	3.065645988300715	1.3026731725337044e-13	8.739634314528623e-10	3.5098932990074794e-12	5	3	4	0.375	1			Unknown
OG0001696	60	25	301	712	16.62049861495845	96.6079	5.677076411960133	1.486897676819291e-13	9.975596513780623e-10	3.990238605512249e-12	5	4	3	0.375	1			Unknown
OG0000556	334	551	27	186	92.5208	25.237449118046136	4.175841903609599	1.8573343348360545e-13	1.246085605241509e-09	4.9644844830339e-12	6	2	5	0.21875000000000003	0.6875000000000002			Unknown
OG0001893	45	12	316	725	12.465373961218837	98.37177747625509	8.603639240506329	2.7822430915129703e-13	1.866606890096052e-09	7.407170198793856e-12	5	4	3	0.375	1			Unknown
OG0001006	67	296	294	441	18.559556786703602	59.83717774762552	0.33952702702702703	2.908123723167333e-13	1.9510602058729635e-09	7.71170041847021e-12	6	5	3	0.21875000000000003	1			Unknown
OG0002501	164	505	197	232	45.42936288088642	31.47896879240163	0.3824496155199276	3.083065262944689e-13	2.068428484909592e-09	8.143419231927527e-12	4	1	4	0.125	0.625	Afu6g09317	LysM domain|LysM domain	Reference-Containing Family
OG0003156	163	503	198	234	45.15235457063712	31.75033921302578	0.3829748780046991	3.289852300767091e-13	2.207161908584641e-09	8.655536896410357e-12	4	1	4	0.125	0.625	Afu6g09330	DDE superfamily endonuclease	Reference-Containing Family
OG0001199	337	564	24	173	93.35180055401662	23.473541383989144	4.307106973995272	4.4260587265409444e-13	2.9694427996363194e-09	1.1599385936079373e-11	5	4	3	0.375	1	Afu5g00440	Acetyltransferase (GNAT) domain	Reference-Containing Family
OG0002943	361	668	0	69	100	9.362279511533243	inf	4.673299637935159e-13	3.135316727090698e-09	1.2199675980897657e-11	2	2	0	0.5	0.5	Afu6g11990		Reference-Containing Family
OG0001561	74	42	287	695	20.498614958448755	94.30122116689282	4.266633482661358	8.111234820531793e-13	5.44182744109478e-09	2.1092354422847986e-11	5	3	3	1	1		DJ-1/PfpI family	Annotated Domain
OG0001668	165	504	196	233	45.70637119113574	31.614654002713706	0.3891824586977648	8.255710931581056e-13	5.538756463997731e-09	2.1385160092655332e-11	4	2	3	0.625	1	Afu6g09430		Reference-Containing Family
OG0002370	27	1	334	736	7.479224376731302	99.86431478968792	59.49700598802395	9.020059613202999e-13	6.051557994497892e-09	2.3186045955930623e-11	4	3	1	0.625	0.625		Acetyltransferase (GNAT) domain	Annotated Domain
OG0002371	27	1	334	736	7.479224376731302	99.86431478968792	59.49700598802395	9.020059613202999e-13	6.051557994497892e-09	2.3186045955930623e-11	4	3	1	0.625	0.625		Cys/Met metabolism PLP-dependent enzyme|Pyridoxal-phosphate dependent enzyme	Annotated Domain
OG0001313	25	174	336	563	6.9252077562326875	76.39077340569878	0.24074644225506295	1.0274995060383717e-12	6.893494186011436e-09	2.631104651149403e-11	6	5	2	0.21875000000000003	0.6875000000000002			Unknown
OG0001641	4	92	357	645	1.10803	87.51696065128901	0.0785532	1.187827341629783e-12	7.969133634994215e-09	3.030088834598561e-11	5	2	4	0.375	1			Unknown
OG0000580	303	469	58	268	83.93351800554017	36.36363636363637	2.9852216748768474	1.3079942562615739e-12	8.775333465258899e-09	3.323989948961704e-11	6	3	5	0.21875000000000003	1			Unknown
OG0001390	97	73	264	664	26.869806094182824	90.09497964721845	3.3420506434205066	1.6012044825838764e-12	1.0742480873655228e-08	4.053766367417067e-11	5	4	4	0.375	0.375			Unknown
OG0000482	353	627	8	110	97.78393351800554	14.925373134328357	7.741228070175438	1.654512867262666e-12	1.1100126826465226e-08	4.172980009949333e-11	5	4	4	0.375	0.375			Unknown
OG0001645	4	91	357	646	1.10803	87.65264586160109	0.0795395	1.9741663428790947e-12	1.3244681994375847e-08	4.960555054073351e-11	5	2	4	0.375	1			Unknown
OG0000505	345	596	16	141	95.56786703601108	19.131614654002714	5.1011954697986575	2.0179623450341542e-12	1.353850937283414e-08	5.0516826018037837e-11	5	3	3	1	1			Unknown
OG0000543	335	562	26	175	92.7978	23.7449	4.012113331508349	2.3495170076487886e-12	1.5762909604315723e-08	5.859817696771644e-11	6	2	5	0.21875000000000003	0.6875000000000002			Unknown
OG0000458	315	503	46	234	87.25761772853186	31.75033921302578	3.1856685971129743	2.496744952997285e-12	1.6750661889658785e-08	6.18105604784457e-11	5	2	5	0.0625	1			Unknown
OG0001137	46	234	315	503	12.742382271468145	68.24966078697422	0.3139058472391806	2.496744952997285e-12	1.6750661889658785e-08	6.18105604784457e-11	5	4	3	0.375	1			Unknown
OG0001505	79	50	282	687	21.88365650969529	93.2157	3.849148936170213	2.6441501831943786e-12	1.7739603579051087e-08	6.521913080533487e-11	6	5	3	0.21875000000000003	1			Unknown
OG0002398	26	1	335	736	7.202216066481995	99.86431478968792	57.12238805970149	2.7825141835160336e-12	1.866788765720907e-08	6.83805408688977e-11	4	3	1	0.625	0.625			Unknown
OG0001003	170	190	191	547	47.091412742382275	74.21981004070555	2.56241	3.407507968096287e-12	2.286097095795799e-08	8.343420057648901e-11	5	4	4	0.375	0.375			Unknown
OG0000922	64	279	297	458	17.72853185595568	62.14382632293079	0.3537405114466046	4.704760880070733e-12	3.1564240744394545e-08	1.147790572523438e-10	5	1	5	0.0625	0.375			Unknown
OG0001658	4	88	357	649	1.10803	88.05970149253731	0.0826331	5.98424936855989e-12	4.01483290136683e-08	1.4546496019445036e-10	4	3	2	0.625	1			Unknown
OG0001669	60	30	301	707	16.62049861495845	95.92944369063771	4.6976744186046515	8.077960410844068e-12	5.419503639635285e-08	1.9564995088936048e-10	5	4	2	0.375	1			Unknown
OG0001322	23	161	338	576	6.3711911357340725	78.15468113975577	0.24344885883347422	8.78207011391831e-12	5.891890839427794e-08	2.1193851940387747e-10	6	2	6	0.03125	0.6875000000000002			Unknown
OG0001286	114	101	247	636	31.57894736842105	86.29579375848031	2.9063214013709064	9.578639915299676e-12	6.426309519174552e-08	2.3033367452238537e-10	5	5	3	0.0625	1			Unknown
OG0001240	119	109	242	628	32.96398891966759	85.21031207598372	2.833118507847449	1.01291639241011e-11	6.795656076679428e-08	2.42702002738551e-10	6	5	4	0.21875000000000003	0.6875000000000002			Unknown
OG0001748	53	23	308	714	14.681440443213297	96.87924016282226	5.341897233201581	1.0568528252991284e-11	7.090425604931853e-08	2.5232831334277056e-10	5	4	2	0.375	1			Unknown
OG0001234	10	114	351	623	2.7700831024930745	84.53188602442334	0.15569550657269957	1.0852424956224478e-11	7.280891903131003e-08	2.5818765613939726e-10	4	3	2	0.625	1			Unknown
OG0001039	64	276	297	461	17.72853185595568	62.550881953867034	0.3599277802176353	1.1291429300924706e-11	7.575419917990385e-08	2.6768268261450124e-10	6	5	3	0.21875000000000003	1		Fungal protein of unknown function (DUF1748)	Annotated Domain
OG0001141	139	140	222	597	38.504155124653735	81.00407055630936	2.669980694980695	1.1673654481542292e-11	7.831854791666723e-08	2.7576953491784237e-10	5	4	4	0.375	0.375			Unknown
OG0000822	228	305	133	432	63.1579	58.61601085481682	2.428103044496487	1.2130028693192486e-11	8.138036250262839e-08	2.855451315881698e-10	5	2	5	0.0625	1			Unknown
OG0002035	36	8	325	729	9.9723	98.9145	10.093846153846155	1.241323512887513e-11	8.328039447962324e-08	2.901755905213353e-10	5	4	3	0.375	1			Unknown
OG0002039	36	8	325	729	9.9723	98.9145	10.093846153846155	1.241323512887513e-11	8.328039447962324e-08	2.901755905213353e-10	4	3	2	0.625	1		Protein of unknown function (DUF3723)	Annotated Domain
OG0000588	317	515	44	222	87.81163434903047	30.12211668928087	3.105648720211827	1.5739890389061826e-11	1.055989246202158e-07	3.666629327090826e-10	6	4	4	0.6875000000000002	0.6875000000000002			Unknown
OG0001098	147	155	214	582	40.7202	78.96879240162822	2.5792583659933674	1.5935677405292135e-11	1.0691245971210494e-07	3.699393069623008e-10	6	5	3	0.21875000000000003	1		Glycosyl hydrolase family 10	Annotated Domain
OG0001231	122	114	239	623	33.795013850415515	84.53188602442334	2.789620494751523	1.6702901600265608e-11	1.1205976683618196e-07	3.8641298909028263e-10	6	6	3	0.03125	1			Unknown
OG0003070	165	495	196	242	45.70637119113574	32.83582089552239	0.41156462585034015	1.6930411612571903e-11	1.135861315087449e-07	3.9033034882730206e-10	4	2	3	0.625	1	Afu6g09395		Reference-Containing Family
OG0000852	197	245	164	492	54.57063711911358	66.75712347354138	2.4122448979591837	1.889937200522147e-11	1.2679588678303085e-07	4.3423248898298235e-10	5	3	4	0.375	1		BTB/POZ domain|FAD binding domain|Berberine and berberine like	Annotated Domain
OG0001551	73	46	288	691	20.221606648199447	93.7585	3.8075935990338166	1.9021277175499637e-11	1.2761374857042707e-07	4.355418039946316e-10	6	5	2	0.21875000000000003	0.6875000000000002			Unknown
OG0001795	1	69	360	668	0.2770083102493075	90.63772048846675	0.0268921	1.918954386957026e-11	1.2874264982094687e-07	4.37900169459003e-10	4	1	3	0.625	0.625			Unknown
OG0001786	50	21	311	716	13.850415512465375	97.15061058344641	5.481549532996478	2.9421714468914596e-11	1.9739028237194804e-07	6.691196012608408e-10	4	3	2	0.625	1			Unknown
OG0001825	40	12	321	725	11.080332409972298	98.37177747625509	7.528556593977155	3.1017640179841086e-11	2.0809734796655385e-07	7.030315809680873e-10	4	2	3	0.625	1		Reverse transcriptase (RNA-dependent DNA polymerase)|Endonuclease-reverse transcriptase	Annotated Domain
OG0002048	35	8	326	729	9.695290858725762	98.9145	9.783358895705522	3.29724531406883e-11	2.212121881208778e-07	7.423227789291201e-10	5	4	3	0.375	1		Beta-L-arabinofuranosidase GH127 middle domain|Beta-L-arabinofuranosidase GH127 catalytic domain	Annotated Domain
OG0002049	35	8	326	729	9.695290858725762	98.9145	9.783358895705522	3.29724531406883e-11	2.212121881208778e-07	7.423227789291201e-10	5	4	3	0.375	1		Polysaccharide lyase	Annotated Domain
OG0001421	17	137	344	600	4.7091412742382275	81.41112618724559	0.21643184518757427	3.692498404841231e-11	2.477297179807982e-07	8.285274848856126e-10	5	4	2	0.375	1		NAD(P)H-binding	Annotated Domain
OG0002444	167	495	194	242	46.26038781163435	32.83582089552239	0.42084765177548683	4.239874073691181e-11	2.844531516039413e-07	9.481771720131377e-10	4	2	3	0.625	1	Afu6g09450		Reference-Containing Family
OG0001325	102	87	259	650	28.254847645429365	88.19538670284939	2.9423512182132874	5.0661384954752847e-11	3.3988723166143683e-07	1.1291934606692253e-09	5	5	3	0.0625	1		Microvirus H protein (pilot protein)	Annotated Domain
OG0000972	176	209	185	528	48.75346260387812	71.64179104477611	2.4034139402560455	5.1476361073092664e-11	3.4535490643937866e-07	1.1435592928456246e-09	5	4	4	0.375	0.375			Unknown
OG0001248	118	111	243	626	32.686980609418285	84.93894165535957	2.738590442294146	5.281300574208397e-11	3.5432245552364135e-07	1.1693810413321496e-09	5	4	3	0.375	1			Unknown
OG0001370	23	155	338	582	6.3711911357340725	78.96879240162822	0.2555067761023096	5.747378497194904e-11	3.855916233768061e-07	1.26839349795002e-09	6	5	2	0.21875000000000003	0.6875000000000002		Cytochrome P450	Annotated Domain
OG0000885	201	257	160	480	55.67867036011081	65.12890094979647	2.3463035019455254	6.279044214474118e-11	4.2126107634906856e-07	1.381183856882192e-09	6	6	3	0.03125	1			Unknown
OG0002096	33	7	328	730	9.141274238227147	99.05020352781547	10.492160278745645	6.346074733609618e-11	4.257581538778693e-07	1.3913665159407492e-09	5	4	3	0.375	1		Glutathione S-transferase C-terminal domain|Glutathione S-transferase N-terminal domain	Annotated Domain
OG0001445	323	726	38	11	89.47368421052632	1.4925373134328357	0.12878787878787878	6.643873416282646e-11	4.457374674984027e-07	1.451913574913364e-09	5	3	4	0.375	1	Afu3g00130		Reference-Containing Family
OG0001396	28	171	333	566	7.756232686980609	76.79782903663501	0.2783134011204187	7.158922617884033e-11	4.802921184338398e-07	1.5593899949150643e-09	5	4	2	0.375	1	Afu1g00640	Choline/ethanolamine kinase|Choline/ethanolamine kinase	Reference-Containing Family
OG0000598	222	592	139	145	61.495844875346265	19.674355495251017	0.39118705035971224	7.244829137204531e-11	4.86055586815052e-07	1.5729954265859288e-09	5	2	4	0.375	1		Ribosome associated membrane protein RAMP4	Annotated Domain
OG0000628	299	472	62	265	82.82548476454294	35.95658073270013	2.707592946965555	7.413924674489484e-11	4.974002064114995e-07	1.6045167948758049e-09	5	4	4	0.375	0.375			Unknown
OG0001948	39	12	322	725	10.80332409972299	98.37177747625509	7.317546583850931	7.789518114219086e-11	5.225987702829585e-07	1.6803818980159437e-09	5	4	2	0.375	1			Unknown
OG0001959	361	679	0	58	100	7.869742198100408	inf	8.609512018260647e-11	5.776121613051068e-07	1.8513210298240603e-09	2	2	0	0.5	0.5	Afu2g00440		Reference-Containing Family
OG0000941	86	322	275	415	23.822714681440445	56.30936227951153	0.4030491247882552	9.093997967144467e-11	6.101163236157223e-07	1.94925343008218e-09	5	4	3	0.375	1			Unknown
OG0001805	29	172	332	565	8.033240997229916	76.66214382632293	0.2869326141776408	9.696781981781482e-11	6.505571031577196e-07	2.071837908145604e-09	4	3	2	0.625	1	Afu6g03130		Reference-Containing Family
OG0000644	293	458	68	279	81.16343490304709	37.8562	2.6248073465193937	9.776375712124875e-11	6.558970465264579e-07	2.0822128461157394e-09	6	4	4	0.6875000000000002	0.6875000000000002			Unknown
OG0001706	176	509	185	228	48.75346260387812	30.936227951153324	0.42614559549726544	1.0344760351489704e-10	6.940299719814442e-07	2.1962973796881147e-09	4	1	4	0.125	0.625	Afu6g09335|Afu6g09356	SRF-type transcription factor (DNA-binding and dimerisation domain)	Reference-Containing Family
OG0001130	138	145	223	592	38.227146814404435	80.32564450474898	2.5265501778258854	1.146572782198997e-10	7.692356795773071e-07	2.426610976584565e-09	6	5	4	0.21875000000000003	0.6875000000000002			Unknown
OG0002993	165	488	196	249	45.70637119113574	33.78561736770692	0.429544	1.1735461578515875e-10	7.8733211730263e-07	2.4758871613290253e-09	4	2	3	0.625	1	Afu6g09420	Tetratricopeptide repeat	Reference-Containing Family
OG0002255	28	4	333	733	7.756232686980609	99.4573	15.408408408408409	1.2358235107984347e-10	8.291139933946699e-07	2.599103427569498e-09	4	3	2	0.625	1			Unknown
OG0000859	110	375	251	362	30.47091412742382	49.11804613297151	0.42305444887118193	1.2669536809576746e-10	8.499992245545038e-07	2.6562475767328245e-09	5	5	3	0.0625	1			Unknown
OG0000743	152	462	209	275	42.10526315789473	37.3134	0.4329004329004329	1.2905288322267338e-10	8.658157935409157e-07	2.697245462744286e-09	5	4	4	0.375	0.375			Unknown
OG0000855	100	352	261	385	27.70083102493075	52.23880597014925	0.4190613026819923	1.3969554387223844e-10	9.372174038388478e-07	2.9106130554001484e-09	6	3	5	0.21875000000000003	1		Protein kinase domain	Annotated Domain
OG0001699	4	80	357	657	1.10803	89.14518317503392	0.0920168	1.4564519250637125e-10	9.771335965252447e-07	3.0251814133908507e-09	4	3	2	0.625	1			Unknown
OG0001232	38	197	323	540	10.526315789473683	73.27001356852104	0.32248432367871005	1.5385396037207424e-10	1.032206220136246e-06	3.1858216670871793e-09	5	3	5	0.0625	1		Dihydrodipicolinate synthetase family	Annotated Domain
OG0004891	329	730	32	7	91.13573407202216	0.9497964721845319	0.0985873	1.6907630494738436e-10	1.1343329298920017e-06	3.490255168898467e-09	5	2	4	0.375	1	Afu3g00180	short chain dehydrogenase	Reference-Containing Family
OG0000865	107	367	254	370	29.6399	50.20352781546812	0.42470338346671244	1.7723426304048243e-10	1.1890646707385966e-06	3.6474376403024435e-09	6	4	5	0.21875000000000003	0.6875000000000002			Unknown
OG0001354	97	83	264	654	26.869806094182824	88.7381	2.8951259583789706	2.2110892988958503e-10	1.483419810629226e-06	4.536452020272862e-09	5	5	3	0.0625	1		Bacteriophage replication gene A protein (GPA)	Annotated Domain
OG0000726	160	476	201	261	44.32132963988919	35.41383989145183	0.43647309670136714	2.3065442048509776e-10	1.5474605070345208e-06	4.7178673994954905e-09	5	2	4	0.375	1			Unknown
OG0001256	36	190	325	547	9.9723	74.21981004070555	0.3188987854251012	2.3155190627152146e-10	1.5534817391756375e-06	4.721828994454825e-09	6	4	4	0.6875000000000002	0.6875000000000002			Unknown
OG0001794	2	68	359	669	0.554017	90.77340569877883	0.054809110273635914	2.345525771157344e-10	1.5736132398694623e-06	4.7685249693014005e-09	4	2	2	1	1			Unknown
OG0002050	34	9	327	728	9.418282548476455	98.7788	8.410465511382943	2.9092322619075225e-10	1.9518039245137568e-06	5.896688593697151e-09	4	3	2	0.625	1			Unknown
OG0001072	52	233	309	504	14.40443213296399	68.3853	0.3640151672986374	3.460032635310652e-10	2.3213358950299163e-06	6.991975587439507e-09	5	3	4	0.375	1		Phosphotransferase enzyme family	Annotated Domain
OG0000565	325	548	36	189	90.02770083102493	25.64450474898236	3.113594890510949	3.489747960123444e-10	2.3412719064468186e-06	7.030846565906362e-09	4	2	3	0.625	1		SnoaL-like domain	Annotated Domain
OG0000882	200	261	161	476	55.4017	64.58616010854816	2.265533899716808	3.6216717267789726e-10	2.4297795614960126e-06	7.274789106275487e-09	6	4	4	0.6875000000000002	0.6875000000000002			Unknown
OG0002402	5	83	356	654	1.3850415512465373	88.7381	0.11066738865574659	3.662329314982765e-10	2.457056737421937e-06	7.334497723647573e-09	4	3	2	0.625	1	Afu1g16170|Afu5g15040	Protein of unknown function (DUF3435)	Reference-Containing Family
OG0000782	238	338	123	399	65.92797783933518	54.13839891451831	2.28417	3.7661897092045283e-10	2.526736675905318e-06	7.52004963067059e-09	6	3	5	0.21875000000000003	1			Unknown
OG0001799	2	67	359	670	0.554017	90.9091	0.055710306406685235	3.945758377631611e-10	2.647209295553048e-06	7.855220461581744e-09	4	1	4	0.125	0.625			Unknown
OG0001608	16	126	345	611	4.43213	82.90366350067842	0.22489072923855533	4.0248010558818145e-10	2.7002390283911095e-06	7.988872865062454e-09	5	2	4	0.375	1	Afu1g00810		Reference-Containing Family
OG0000816	171	207	190	530	47.368421052631575	71.91316146540026	2.3043478260869565	4.2260265392731084e-10	2.8352412051983284e-06	8.36354337816616e-09	5	2	5	0.0625	1		Protein of unknown function (DUF3723)|Protein kinase domain	Annotated Domain
OG0001715	4	77	357	660	1.10803	89.55223880597015	0.0960384	4.289327270571392e-10	2.877709665826347e-06	8.463851958312785e-09	5	3	3	1	1			Unknown
OG0001409	88	72	273	665	24.37673130193906	90.23066485753053	2.977207977207977	5.321857502098725e-10	3.5704341981580342e-06	1.0470481519525028e-08	5	3	4	0.375	1			Unknown
OG0000525	323	544	38	193	89.47368421052632	26.187245590230663	3.01562	5.405371804876711e-10	3.626463943891785e-06	1.0603695742373641e-08	5	3	4	0.375	1		Ankyrin repeats (3 copies)|Ankyrin repeats (3 copies)|Zinc knuckle|Phosphorylase superfamily|Retrotransposon gag protein|NACHT domain	Annotated Domain
OG0001217	41	201	320	536	11.357340720221606	72.72727272727273	0.3416666666666667	6.425872518859188e-10	4.3111178729026285e-06	1.256885677231087e-08	5	3	4	0.375	1			Unknown
OG0005179	148	448	213	289	40.99722991689751	39.21302578018996	0.4482310529845741	7.74579726882153e-10	5.196655387652364e-06	1.5106556359454546e-08	5	2	4	0.375	1	Afu6g09360		Reference-Containing Family
OG0000877	201	265	160	472	55.67867036011081	64.04341926729987	2.2375471698113207	8.402350458890685e-10	5.637136922869761e-06	1.6339527312665974e-08	5	4	4	0.375	0.375			Unknown
OG0002146	29	6	332	731	8.033240997229916	99.18588873812755	10.64206827309237	8.500537762120554e-10	5.703010784606679e-06	1.6482690128921038e-08	5	4	2	0.375	1	Afu7g08290	WD domain G-beta repeat|WD domain G-beta repeat|WD domain G-beta repeat|WD domain G-beta repeat|WD domain G-beta repeat|WD domain G-beta repeat|WD domain G-beta repeat|WD domain G-beta repeat	Reference-Containing Family
OG0000826	221	305	140	432	61.21883656509696	58.61601085481682	2.235878220140515	8.527022792277611e-10	5.720779591339049e-06	1.648639651682723e-08	6	4	5	0.21875000000000003	0.6875000000000002			Unknown
OG0000869	203	270	158	467	56.232686980609415	63.36499321573948	2.222245663384904	9.3169609805788e-10	6.250749121870317e-06	1.7961922763995165e-08	6	5	4	0.21875000000000003	0.6875000000000002		Ribosomal protein L36	Annotated Domain
OG0001541	12	108	349	629	3.3241	85.346	0.2002546959567017	1.0842615706952001e-09	7.274310877794098e-06	2.0843297644109164e-08	5	2	4	0.375	1		Pectate lyase superfamily protein|Pectate lyase superfamily protein|LysM domain	Annotated Domain
OG0001316	30	167	331	570	8.310249307479225	77.34056987788331	0.3093510863469436	1.1221764865396963e-09	7.528682048194822e-06	2.1510520137699492e-08	5	3	5	0.0625	1			Unknown
OG0001404	90	77	271	660	24.930747922437675	89.55223880597015	2.846599894570374	1.1924958789903926e-09	8.000454852146544e-06	2.2793318667084172e-08	5	5	3	0.0625	1		Capsid protein (F protein)	Annotated Domain
OG0001095	135	147	226	590	37.396121883656505	80.05427408412483	2.3975076756366263	1.2347183480443802e-09	8.283725397029747e-06	2.3533310787016324e-08	6	3	4	0.6875000000000002	1			Unknown
OG0002439	324	724	37	13	89.75069252077562	1.7639077340569878	0.1572345826489473	1.2927458938278347e-09	8.673032201690943e-06	2.456949632207066e-08	5	3	4	0.375	1	Afu3g00140		Reference-Containing Family

## Sheet: cluster4
Orthogroup	Number_pos_present_in	Number_neg_present_in	Number_pos_not_present_in	Number_neg_not_present_in	Sensitivity	Specificity	Odds_ratio	Naive_p	Bonferroni_p	Benjamini_H_p	Max_Pairwise_comparisons	Max_supporting_pairs	Max_opposing_pairs	Best_pairwise_comp_p	Worst_pairwise_comp_p	Af293 Reference	Pfam Domain(s)	Annotation Class
OG0000748	38	569	361	130	9.523809523809524	18.59799713876967	0.024049579132365183	3.201126084319579e-129	2.1476354899700054e-125	2.1476354899700054e-125	17	10	10	0.629059	0.629059			Unknown
OG0000756	41	558	358	141	10.275689223057643	20.171673819742487	0.028939148194869948	5.090092516263882e-120	3.4149430691614384e-116	1.7074715345807192e-116	17	10	10	0.629059	0.629059		GMC oxidoreductase|GMC oxidoreductase	Annotated Domain
OG0000747	44	558	355	141	11.027568922305765	20.171673819742487	0.031319097379978796	5.912772658655177e-117	3.9668791766917585e-113	1.3222930588972527e-113	17	11	10	0.33230590820312506	0.629059			Unknown
OG0003357	390	255	9	444	97.74436090225564	63.519313304721024	75.45098039215686	8.493783827977067e-107	5.698479570189814e-103	1.4246198925474535e-103	14	6	8	0.7905273437500004	0.7905273437500004	Afu3g00100	Endoribonuclease L-PSP|Flavin containing amine oxidoreductase	Reference-Containing Family
OG0004755	393	292	6	407	98.49624060150376	58.22603719599427	91.29623287671232	4.747168854161639e-97	3.184875584257044e-93	6.369751168514088e-94	11	5	6	0.9999999999999997	0.9999999999999997	Afu1g16900	Fungal specific transcription factor domain	Reference-Containing Family
OG0000550	25	440	374	259	6.265664160401002	37.05293276108726	0.039347350510452114	7.683982938301603e-86	5.155184153306545e-82	8.591973588844242e-83	13	11	6	0.022460937500000003	0.9999999999999999			Unknown
OG0000992	6	367	393	332	1.5037593984962405	47.4964	0.013811177902115357	2.4224356345781776e-83	1.6252120672384993e-79	2.3217315246264275e-80	13	6	8	0.581055	0.9999999999999999			Unknown
OG0000668	390	321	9	378	97.74436090225564	54.077253218884124	51.02803738317757	7.911708869005354e-83	5.307965480215692e-79	6.634956850269615e-80	15	9	8	0.6072387695312501	0.9999999999999997			Unknown
OG0000758	39	467	360	232	9.774436090225564	33.190271816881264	0.053818700927908636	2.273111997867045e-82	1.5250308393690006e-78	1.6887142135163555e-79	18	10	12	0.23788452148437486	0.8145294189453123		Ankyrin repeats (3 copies)|Ankyrin repeats (3 copies)|Ankyrin repeats (3 copies)|Ankyrin repeats (3 copies)	Annotated Domain
OG0002375	106	588	293	111	26.56641604010025	15.879828326180256	0.0682942	2.517087812664116e-82	1.6887142135163554e-78	1.6887142135163555e-79	20	11	14	0.11531829833984371	0.8238029479980463	Afu1g17500	Trichodiene synthase (TRI5)	Reference-Containing Family
OG0006217	257	69	142	630	64.41102756892231	90.12875536480686	16.524800979791795	3.40965203119557e-81	2.287535547729108e-77	2.0795777706628254e-78	17	11	9	0.33230590820312506	0.9999999999999998	Afu4g07450		Reference-Containing Family
OG0000908	23	419	376	280	5.764411027568922	40.05722460658083	0.040877469151475145	2.6716787910535594e-80	1.792429300917833e-76	1.493691084098194e-77	13	10	6	0.0922852	0.9999999999999999			Unknown
OG0001960	145	610	254	89	36.340852130325814	12.732474964234623	0.0832903	1.951700620509181e-68	1.3093959462996094e-64	1.0072276509996996e-65	20	11	13	0.2631759643554687	0.8238029479980463	Afu2g09420	F-box-like	Reference-Containing Family
OG0000689	371	314	28	385	92.98245614035088	55.07868383404863	16.246019108280255	1.660045830972301e-64	1.1137247479993168e-60	7.955176771423691e-62	15	12	6	0.035156250000000014	0.6072387695312501		NAD dependent epimerase/dehydratase family	Annotated Domain
OG0004043	298	161	101	538	74.68671679197995	76.96709585121603	9.859418239960641	4.881129911538501e-64	3.2747500576511804e-60	2.183166705100787e-61	22	13	13	0.5234670639038081	0.5234670639038081	Afu8g06300		Reference-Containing Family
OG0000915	34	400	365	299	8.521303258145362	42.77539341917024	0.0696301	5.8976577685142364e-64	3.956738596896201e-60	2.4729616230601256e-61	17	12	8	0.14346313476562497	0.9999999999999998			Unknown
OG0006705	296	158	103	541	74.18546365914787	77.39628040057225	9.83999	6.641806217435585e-64	4.4559877912775343e-60	2.621169288986785e-61	22	13	13	0.5234670639038081	0.5234670639038081	Afu8g06250		Reference-Containing Family
OG0001236	328	216	71	483	82.20551378446115	69.09871244635193	10.3302	2.0411380508939692e-63	1.3693995183447639e-59	7.607775101915354e-61	22	13	11	0.5234670639038081	1	Afu8g06280		Reference-Containing Family
OG0000013	358	283	41	416	89.72431077694235	59.513590844062946	12.835301215202964	3.342976725978687e-63	2.242803085459101e-59	1.163414626849792e-60	17	9	11	0.33230590820312506	0.9999999999999998		Helicase conserved C-terminal domain|DEAD/DEAH box helicase|Orsellinic acid/F9775 biosynthesis cluster protein D	Annotated Domain
OG0005240	296	160	103	539	74.18546365914787	77.1102	9.681067961165049	3.4682206792362257e-63	2.326829253699584e-59	1.163414626849792e-60	22	13	13	0.5234670639038081	0.5234670639038081	Afu8g06320		Reference-Containing Family
OG0005239	294	158	105	541	73.68421052631578	77.39628040057225	9.587341772151898	1.6071027627436365e-62	1.0782052435247057e-58	5.13431068345098e-60	22	14	13	0.2862787246704102	0.5234670639038081	Afu8g06270		Reference-Containing Family
OG0002889	297	164	102	535	74.43609022556392	76.5379	9.498744619799139	4.6556659388980474e-62	3.1234862784067e-58	1.4197664901848637e-59	22	13	13	0.5234670639038081	0.5234670639038081	Afu8g06335		Reference-Containing Family
OG0003391	295	162	104	537	73.93483709273183	76.82403433476395	9.402599715099715	1.0144702913924383e-61	6.806081184951869e-58	2.959165732587769e-59	22	13	13	0.5234670639038081	0.5234670639038081	Afu8g06370	FAD binding domain	Reference-Containing Family
OG0000814	190	645	209	54	47.61904761904761	7.725321888412018	0.0761099	1.1453332237853213e-61	7.684040598375721e-58	3.2016835826565505e-59	17	8	12	0.14346313476562497	0.9999999999999998	Afu3g03750		Reference-Containing Family
OG0001230	296	165	103	534	74.18546365914787	76.39484978540773	9.300617828773168	2.4839573395240182e-61	1.6664869790866637e-57	6.6659479163466545e-59	22	13	13	0.5234670639038081	0.5234670639038081	Afu8g06230		Reference-Containing Family
OG0000907	289	154	110	545	72.4311	77.96852646638054	9.297815820543093	2.7595983105103595e-61	1.8514145065214003e-57	7.120825025082309e-59	22	13	14	0.2862787246704102	0.5234670639038081			Unknown
OG0002244	296	166	103	533	74.18546365914787	76.25178826895565	9.227278044215698	6.59697740405448e-61	4.425912140380151e-57	1.639226718659315e-58	23	12	14	0.4048728942871095	0.9999999999999998	Afu8g06390		Reference-Containing Family
OG0001099	6	292	393	407	1.5037593984962405	58.22603719599427	0.0212799	2.202261980853921e-60	1.4774975629548957e-56	5.276777010553199e-58	11	4	7	0.548828	0.548828			Unknown
OG0000990	25	351	374	348	6.265664160401002	49.78540772532189	0.0662736	4.387404440304292e-57	2.9435096390001495e-53	1.015003323793155e-54	18	12	11	0.23788452148437486	0.48068237304687483			Unknown
OG0001525	371	341	28	358	92.98245614035088	51.21602288984263	13.910557184750733	2.4275279333228415e-56	1.6286284904662944e-52	5.428761634887648e-54	18	13	10	0.0962524	0.8145294189453123	Afu1g13650		Reference-Containing Family
OG0001756	205	61	194	638	51.37844611528822	91.27324749642347	11.052053405441947	8.349767905066577e-56	5.601859287509167e-52	1.807051383067473e-53	20	14	10	0.11531829833984371	1	Afu4g06430		Reference-Containing Family
OG0001532	392	420	7	279	98.24561403508771	39.91416309012876	37.2	2.282062711085522e-55	1.5310358728672767e-51	4.78448710271024e-53	11	6	5	0.9999999999999997	0.9999999999999997	Afu3g07730		Reference-Containing Family
OG0006672	397	447	2	252	99.49874686716792	36.05150214592275	111.90604026845638	3.565467429933866e-55	2.3920720987426307e-51	7.248703329523123e-53	9	7	2	0.17968750000000003	0.17968750000000003	Afu8g02250		Reference-Containing Family
OG0001160	5	264	394	435	1.2531328320802004	62.231759656652365	0.020910244577757267	7.70557696262521e-54	5.169671584225254e-50	1.5204916424191922e-51	10	5	6	0.7539062500000002	1			Unknown
OG0001374	315	222	84	477	78.94736842105263	68.24034334763948	8.057432432432432	2.844378662849132e-53	1.9082936449054826e-49	5.452267556872807e-51	22	11	14	0.2862787246704102	1	Afu7g08610|Afu8g06380	Ankyrin repeats (3 copies)	Reference-Containing Family
OG0001975	251	120	148	579	62.907268170426065	82.83261802575107	8.18294	4.0373782464573953e-53	2.7086770655482665e-49	7.524102959856296e-51	21	16	11	0.026603698730468753	1	Afu1g03310		Reference-Containing Family
OG0000601	389	416	10	283	97.4937	40.486409155937054	26.463221153846153	6.6801029317908725e-53	4.481681056938496e-49	1.211265150523918e-50	14	7	8	0.7905273437500004	1			Unknown
OG0000605	388	414	11	285	97.24310776942356	40.772532188841204	24.281949934123848	2.361378758471469e-52	1.5842490090585086e-48	4.169076339627654e-50	14	7	8	0.7905273437500004	1			Unknown
OG0001113	10	280	389	419	2.506265664160401	59.94277539341917	0.0384686	3.977683561672939e-52	2.668627901526375e-48	6.842635644939423e-50	13	6	8	0.581055	0.9999999999999999			Unknown
OG0001185	5	252	394	447	1.2531328320802004	63.94849785407726	0.022510273144790913	1.1490207816234633e-50	7.708780423911815e-47	1.9271951059779537e-48	11	5	6	0.9999999999999997	0.9999999999999997			Unknown
OG0001049	15	294	384	405	3.7593984962406015	57.93991416309014	0.053810586734693876	1.4387483070662605e-50	9.652562392107542e-47	2.3542835102701322e-48	12	7	7	0.7744140625000003	0.7744140625000003		Reverse transcriptase (RNA-dependent DNA polymerase)|Chromo (CHRromatin Organisation MOdifier) domain	Annotated Domain
OG0000956	37	362	362	337	9.273182957393484	48.21173104434907	0.0951512	2.2002408483030325e-50	1.4761415851265045e-46	3.514622821729773e-48	13	10	7	0.0922852	0.9999999999999999		Fungal WD-like	Annotated Domain
OG0003390	298	200	101	499	74.68671679197995	71.38769670958513	7.361485148514851	2.521134946590592e-50	1.6914294356676281e-46	3.933556827134019e-48	20	13	11	0.2631759643554687	0.8238029479980463	Afu8g06350	GDSL-like Lipase/Acylhydrolase family	Reference-Containing Family
OG0001592	297	201	102	498	74.43609022556392	71.24463519313305	7.214223002633889	1.9162254999171125e-49	1.2855956878943907e-45	2.9218083815781607e-47	22	13	13	0.5234670639038081	0.5234670639038081	Afu8g06165		Reference-Containing Family
OG0001024	325	257	74	442	81.45363408521304	63.23319027181689	7.553370491113681	1.2336105351452651e-48	8.276293080289584e-45	1.839176240064352e-46	22	13	11	0.5234670639038081	1	Afu8g06132	Protein of unknown function (DUF3435)	Reference-Containing Family
OG0002339	369	365	30	334	92.4812	47.78254649499284	11.255342465753424	3.324008750176935e-48	2.2300774704937057e-44	4.847994501073273e-46	13	5	9	0.26684570312499983	0.581055	Afu3g02450		Reference-Containing Family
OG0002780	377	396	22	303	94.48621553884712	43.34763948497854	13.111914600550964	1.4563425936459468e-46	9.770602460770656e-43	2.078851587398012e-44	14	7	8	0.7905273437500004	1	Afu6g14630		Reference-Containing Family
OG0000648	164	582	235	117	41.10275689223057	16.738197424892704	0.14029392410616362	1.9512400848321888e-46	1.3090869729139155e-42	2.7272645269039907e-44	21	11	16	0.026603698730468753	1		Glutathione-dependent formaldehyde-activating enzyme	Annotated Domain
OG0001211	6	240	393	459	1.5037593984962405	65.66523605150213	0.0291985	3.0773694010102036e-46	2.0646071311377457e-42	4.21348394109744e-44	10	5	7	0.3437499999999999	1			Unknown
OG0001001	238	122	161	577	59.64912280701754	82.54649499284692	6.991446899501069	7.278153574955198e-46	4.8829132334374427e-42	9.765826466874886e-44	21	12	14	0.18924713134765628	0.6636238098144525		Patatin-like phospholipase	Annotated Domain
OG0001087	19	290	380	409	4.761904761904762	58.51216022889842	0.0705172	8.091659608529801e-46	5.4286944313626436e-42	1.064449888502479e-43	14	8	8	0.7905273437500004	0.7905273437500004		Ankyrin repeats (3 copies)	Annotated Domain
OG0002773	172	588	227	111	43.10776942355889	15.879828326180256	0.14303695046300458	7.500743874947128e-45	5.032249065702028e-41	9.677402049426977e-43	21	11	15	0.0783539	1	Afu4g00830	POT family	Reference-Containing Family
OG0000840	293	210	106	489	73.43358395989975	69.95708154506438	6.436522911051213	1.1705067771741105e-44	7.852929968061107e-41	1.4816848996341712e-42	23	21	10	6.604194641113283e-05	0.6776394844055175			Unknown
OG0002638	376	403	23	296	94.23558897243107	42.34620886981402	12.007336282231092	6.991687976275943e-44	4.69072346328353e-40	8.686524932006537e-42	14	7	9	0.4239501953124999	1	Afu6g14620	Alpha-L-arabinofuranosidase B (ABFB) domain|Alpha-L-arabinofuranosidase B catalytic	Reference-Containing Family
OG0001224	178	61	221	638	44.611528822055135	91.27324749642347	8.424004153994511	1.64055428437929e-42	1.1006478693900657e-38	2.001177944345574e-40	22	17	9	0.016900539398193356	0.5234670639038081			Unknown
OG0000982	41	340	358	359	10.275689223057643	51.359084406294706	0.1209250739401906	1.0076467684589663e-41	6.760302169591205e-38	1.2071968159984294e-39	14	10	5	0.17956542968750003	0.4239501953124999		alpha-L-rhamnosidase|alpha-L-rhamnosidase	Annotated Domain
OG0001011	332	297	67	402	83.20802005012531	57.5107	6.707070707070707	1.0628518677254097e-41	7.130673180569774e-38	1.2509952948368023e-39	24	15	15	0.3074562549591064	0.3074562549591064	Afu8g06170		Reference-Containing Family
OG0000944	250	153	149	546	62.65664160401002	78.11158798283262	5.9876299513093825	3.065055725278126e-41	2.0563458860890948e-37	3.520284145786876e-39	21	10	15	0.0783539	1		Reverse transcriptase (RNA-dependent DNA polymerase)	Annotated Domain
OG0001138	17	265	382	434	4.260651629072681	62.08869814020028	0.0728835	3.0957931823136933e-41	2.076967646014257e-37	3.520284145786876e-39	12	7	7	0.7744140625000003	0.7744140625000003			Unknown
OG0000038	358	362	41	337	89.72431077694235	48.21173104434907	8.128688855949333	4.992502279560481e-41	3.3494697793571265e-37	5.582449632261877e-39	20	12	11	0.5034446716308595	0.8238029479980463	Afu5g15090|Afu5g15130		Reference-Containing Family
OG0000775	276	194	123	505	69.17293233082707	72.24606580829757	5.841086245914005	6.701420712587991e-41	4.495983156075283e-37	7.370464190287349e-39	22	13	15	0.13380050659179688	0.5234670639038081			Unknown
OG0000862	73	408	326	291	18.295739348370926	41.63090128755365	0.1597121977625406	7.25175448417134e-40	4.865202083430552e-36	7.847100134565406e-38	14	7	10	0.17956542968750003	1			Unknown
OG0001549	108	11	291	688	27.06766917293233	98.42632331902719	23.21274601686973	2.0311538087153768e-39	1.3627010902671464e-35	2.1630176035986453e-37	14	11	5	0.057373	0.4239501953124999			Unknown
OG0003259	168	59	231	640	42.10526315789473	91.55937052932761	7.889060092449923	5.579543820502562e-39	3.743315949175169e-35	5.848931170586201e-37	18	14	11	0.0308838	0.48068237304687483	Afu6g11640	Fungal specific transcription factor domain|Fungal Zn(2)-Cys(6) binuclear cluster domain	Reference-Containing Family
OG0000969	46	340	353	359	11.528822055137844	51.359084406294706	0.13759373437760372	1.5370304853280108e-38	1.0311937526065625e-34	1.5864519270870192e-36	13	11	5	0.022460937500000003	0.581055			Unknown
OG0000848	76	408	323	291	19.047619047619047	41.63090128755365	0.16782006920415224	2.843169112667941e-38	1.9074821576889216e-34	2.890124481346851e-36	14	7	10	0.17956542968750003	1		HNH endonuclease	Annotated Domain
OG0000973	46	339	353	360	11.528822055137844	51.50214592274678	0.13838401564341046	3.2635989783644e-38	2.189548554584676e-34	3.267982917290561e-36	13	11	5	0.022460937500000003	0.581055			Unknown
OG0000951	242	154	157	545	60.6516	77.96852646638054	5.454959053685168	2.9964362536569085e-37	2.01030908257842e-33	2.956336886144735e-35	21	10	14	0.18924713134765628	1	Afu8g06260		Reference-Containing Family
OG0002876	330	313	69	386	82.70676691729322	55.22174535050072	5.8980413946381445	1.2472844124708444e-36	8.368031123266895e-33	1.2127581338067964e-34	19	15	8	0.019210815429687503	0.6476058959960938	Afu3g02600		Reference-Containing Family
OG0000824	92	433	307	266	23.05764411027569	38.054363376251786	0.18409550819598136	1.4091506020245417e-36	9.45399138898265e-33	1.3505701984260929e-34	20	11	14	0.11531829833984371	0.8238029479980463			Unknown
OG0004910	328	309	71	390	82.20551378446115	55.793991416309005	5.830712429919322	1.667898302312955e-36	1.1189929710217615e-32	1.576046438058819e-34	19	14	9	0.0635681	1	Afu3g02585		Reference-Containing Family
OG0000779	80	408	319	291	20.050125313283207	41.63090128755365	0.17886778535865758	2.671750583118929e-36	1.7924774662144893e-32	2.489552036409013e-34	21	12	15	0.0783539	0.6636238098144525			Unknown
OG0004308	328	310	71	389	82.20551378446115	55.65092989985694	5.797	3.517811506738103e-36	2.3600997398705935e-32	3.233013342288484e-34	19	14	9	0.0635681	1	Afu3g02560		Reference-Containing Family
OG0003072	331	318	68	381	82.95739348370927	54.506437768240346	5.831992230854606	5.317072985176486e-36	3.5672242657549044e-32	4.820573332101222e-34	21	14	11	0.18924713134765628	1	Afu7g06960	FAD binding domain	Reference-Containing Family
OG0002769	329	314	70	385	82.45614035087719	55.07868383404863	5.762738853503185	7.058537066326074e-36	4.7355725177981635e-32	6.314096690397551e-34	19	14	9	0.0635681	1	Afu3g02590	Fungal Zn(2)-Cys(6) binuclear cluster domain	Reference-Containing Family
OG0001251	10	216	389	483	2.506265664160401	69.09871244635193	0.0574836	1.1550068531581365e-35	7.748940977837938e-32	1.0195974970839391e-33	13	8	8	0.581055	0.581055			Unknown
OG0003746	330	318	69	381	82.70676691729322	54.506437768240346	5.730106644790812	2.500646340196898e-35	1.677683629638099e-31	2.1788099086209077e-33	21	14	11	0.18924713134765628	1	Afu7g06940	Fungal specific transcription factor domain	Reference-Containing Family
OG0000706	112	464	287	235	28.07017543859649	33.61945636623748	0.19764507989907484	7.167277917787804e-35	4.808526755043838e-31	6.164777891081843e-33	21	13	13	0.38331031799316395	0.38331031799316395	Afu1g16050|Afu5g14950		Reference-Containing Family
OG0005808	377	443	22	256	94.48621553884712	36.62374821173104	9.90273	7.260417695436216e-35	4.8710142318681575e-31	6.165840799833111e-33	20	16	8	0.011817932128906248	0.5034446716308595	Afu2g08680		Reference-Containing Family
OG0001134	24	260	375	439	6.015037593984962	62.80400572246065	0.10806153846153846	2.719486378134849e-34	1.8245034110906702e-30	2.2806292638633378e-32	16	10	9	0.45449829101562506	0.8036193847656252			Unknown
OG0001212	14	223	385	476	3.508771929824561	68.0973	0.0776192	1.2168407681094928e-33	8.163784713246587e-30	1.007874655956369e-31	16	9	10	0.45449829101562506	0.8036193847656252		Reverse transcriptase (RNA-dependent DNA polymerase)|GAG-pre-integrase domain	Annotated Domain
OG0001006	223	140	176	559	55.88972431077694	79.97138769670958	5.059131493506493	1.902852834901374e-33	1.2766239669353318e-29	1.5568584962625999e-31	22	14	13	0.2862787246704102	0.5234670639038081			Unknown
OG0000659	277	226	122	473	69.42355889724311	67.66809728183118	4.751958508631946	7.205878766533734e-33	4.8344240644674826e-29	5.8246073065873284e-31	17	9	15	0.00234985	0.9999999999999998		Orsellinic acid/F9775 biosynthesis cluster protein D|DEAD/DEAH box helicase|Helicase conserved C-terminal domain	Annotated Domain
OG0000695	153	522	246	177	38.34586466165413	25.321888412017167	0.21089150546677882	1.8263621232211162e-32	1.2253063484690468e-28	1.4586980338917223e-30	21	11	16	0.026603698730468753	1			Unknown
OG0000947	238	166	161	533	59.64912280701754	76.25178826895565	4.746464117338921	4.3566338970775223e-32	2.92286568154931e-28	3.4386655077050705e-30	23	13	19	0.00259948	0.6776394844055175			Unknown
OG0001504	108	22	291	677	27.06766917293233	96.85264663805437	11.420805998125585	1.7675153100150438e-31	1.1858260214890929e-27	1.3788674668477825e-29	18	14	7	0.0308838	0.48068237304687483			Unknown
OG0001299	9	193	390	506	2.2556390977443606	72.38912732474965	0.0605022	2.294998895308296e-31	1.5397147588623358e-27	1.7697870791521101e-29	12	7	7	0.7744140625000003	0.7744140625000003			Unknown
OG0000760	306	287	93	412	76.69172932330827	58.941344778254646	4.723389906710127	4.044202761332555e-31	2.7132556325780114e-27	3.0832450370204674e-29	22	19	9	0.000855446	0.5234670639038081			Unknown
OG0001202	168	79	231	620	42.10526315789473	88.69814020028612	5.70771	5.868621419282767e-31	3.9372581101968085e-27	4.423885517075066e-29	21	14	11	0.18924713134765628	1			Unknown
OG0001030	32	269	367	430	8.020050125313283	61.51645207439199	0.1393798810814096	7.216629032752263e-31	4.841636418073493e-27	5.379596020081659e-29	18	8	12	0.23788452148437486	0.8145294189453123		Reverse transcriptase (RNA-dependent DNA polymerase)	Annotated Domain
OG0001058	197	116	202	583	49.373433583959894	83.40486409155938	4.901459542505974	4.6567115937280384e-30	3.124187808232141e-26	3.4331734156397153e-28	22	13	16	0.052478790283203125	0.5234670639038081			Unknown
OG0000334	176	547	223	152	44.11027568922306	21.745350500715308	0.21931284380354318	5.165603653466689e-30	3.465603491110802e-26	3.7669603164247845e-28	21	14	12	0.18924713134765628	0.6636238098144525			Unknown
OG0000846	271	227	128	472	67.91979949874687	67.52503576537912	4.402257709251101	5.745997131489387e-30	3.85498947551623e-26	4.145149973673365e-28	23	16	11	0.0931396	0.9999999999999998			Unknown
OG0001355	135	49	264	650	33.83458646616541	92.98998569384835	6.783395176252319	2.9308932324540756e-29	1.9663362696534393e-25	2.091847095375999e-27	21	16	12	0.026603698730468753	0.6636238098144525			Unknown
OG0000855	252	200	147	499	63.1579	71.38769670958513	4.277142857142858	5.246040909565455e-29	3.519568846227464e-25	3.704809311818383e-27	22	12	16	0.052478790283203125	0.831812		Protein kinase domain	Annotated Domain
OG0001400	5	164	394	535	1.2531328320802004	76.5379	0.0413984	7.360511349203112e-29	4.938167064180367e-25	5.143924025187883e-27	9	3	6	0.507812	0.507812			Unknown
OG0001326	10	185	389	514	2.506265664160401	73.53361945636624	0.0714236	1.4094667256727947e-28	9.456112262538779e-25	9.748569342823484e-27	10	5	6	0.7539062500000002	1			Unknown
OG0000790	291	271	108	428	72.93233082706767	61.23032904148784	4.255432554325544	4.106165263962652e-28	2.7548262755925432e-24	2.811047219992391e-26	22	18	12	0.00434351	0.831812		Helix-loop-helix DNA-binding domain	Annotated Domain
OG0000511	393	535	6	164	98.49624060150376	23.462088698140203	20.078504672897196	5.487141879996023e-28	3.681323487289331e-24	3.718508573019527e-26	12	7	6	0.7744140625000003	1	Afu3g06970	S4 domain|Ribosomal protein S4/S9 N-terminal domain	Reference-Containing Family
OG0000864	89	390	310	309	22.305764411027567	44.20600858369099	0.22746898263027296	6.197032475612192e-28	4.1575890878882196e-24	4.1575890878882194e-26	21	15	12	0.0783539	0.6636238098144525		Domain of unknown function (DUF4470)|MYND finger	Annotated Domain
OG0001053	44	288	355	411	11.027568922305765	58.798283261802574	0.17687793427230047	7.110162193552934e-28	4.770207815654663e-24	4.722978035301647e-26	22	12	16	0.052478790283203125	0.831812			Unknown
OG0001575	162	82	237	617	40.6015	88.269	5.143254090768756	1.4417597651934338e-27	9.672766264682747e-24	9.483104181061517e-26	20	9	15	0.0413895	0.8238029479980463	Afu8g06150		Reference-Containing Family
OG0000699	325	343	74	356	81.45363408521304	50.92989985693849	4.558348435899457	2.750345764050459e-27	1.8452069731014528e-23	1.7914630806810222e-25	16	11	10	0.21011352539062492	0.45449829101562506			Unknown
OG0001075	38	265	361	434	9.523809523809524	62.08869814020028	0.17239324726911617	1.3753497199916333e-26	9.227221271423867e-23	8.872328145599873e-25	15	8	10	0.30175781250000017	0.9999999999999997			Unknown
OG0000710	217	157	182	542	54.385964912280706	77.53934191702432	4.116119549240568	2.2272442379807906e-26	1.4942581592613124e-22	1.4231030088202975e-24	21	15	13	0.0783539	0.38331031799316395		AMP-binding enzyme|Helicase conserved C-terminal domain|SNF2-related domain|Phosphopantetheine attachment site|Condensation domain	Annotated Domain
OG0002980	394	547	5	152	98.74686716791979	21.745350500715308	21.89689213893967	2.5334530036229632e-26	1.699693620130646e-22	1.6034845472930624e-24	8	5	4	0.7265625000000002	1	Afu3g09120		Reference-Containing Family
OG0001214	151	74	248	625	37.84461152882205	89.4134	5.142491281604185	6.635668463767365e-26	4.451869972341526e-22	4.160626142375258e-24	17	13	6	0.049041748046874986	0.33230590820312506		RNase H	Annotated Domain
OG0001155	172	101	227	598	43.10776942355889	85.55078683834049	4.48624	2.568668225437581e-25	1.7233195124460734e-21	1.5956662152278458e-23	20	16	8	0.011817932128906248	0.5034446716308595		FAD binding domain	Annotated Domain
OG0002991	389	530	10	169	97.4937	24.177396280400572	12.403962264150943	3.1327452371469122e-25	2.1017587796018633e-21	1.9282190638549204e-23	13	6	8	0.581055	0.9999999999999999	Afu6g00193		Reference-Containing Family
OG0000728	149	486	250	213	37.34335839598997	30.472103004291846	0.2612098765432099	4.1579224963818565e-25	2.7895502028225875e-21	2.535954729838716e-23	23	16	11	0.0931396	0.9999999999999998			Unknown
OG0001372	10	168	389	531	2.506265664160401	75.9657	0.0812523	5.843434713183161e-25	3.920360349074583e-21	3.531856170337462e-23	14	10	7	0.17956542968750003	1			Unknown
OG0006267	358	434	41	265	89.72431077694235	37.911301859799714	5.331572440148364	8.770053243925208e-25	5.8838287213494224e-21	5.253418501204841e-23	13	8	9	0.26684570312499983	0.581055	Afu4g11370		Reference-Containing Family
OG0000729	268	246	131	453	67.16791979949875	64.8069	3.767268665053063	1.421123327207264e-24	9.534316402233535e-21	8.4374481435695e-23	20	8	15	0.0413895	0.5034446716308595		Phosphotransferase enzyme family|Fungal protein kinase|Fungal protein kinase|Protein of unknown function (DUF3435)	Annotated Domain
OG0001349	130	56	269	643	32.581453634085214	91.98855507868383	5.548990971853425	2.1485245093811683e-24	1.4414450933438257e-20	1.26442552047704e-22	19	12	9	0.3592834472656249	1			Unknown
OG0001675	76	12	323	687	19.047619047619047	98.28326180257511	13.470588235294118	5.970587391059971e-24	4.0056670806621345e-20	3.4831887657931605e-22	17	11	7	0.33230590820312506	0.629059			Unknown
OG0001081	22	203	377	496	5.513784461152882	70.9585	0.14258274424742914	1.7129427717428176e-23	1.1492133055622564e-19	9.907011254847038e-22	14	10	8	0.17956542968750003	0.7905273437500004	Afu3g04100|Afu3g04270		Reference-Containing Family
OG0001338	14	176	385	523	3.508771929824561	74.8212	0.10805785123966942	1.8703612366592396e-23	1.2548253536746839e-19	1.0725003022860546e-21	17	6	13	0.049041748046874986	0.33230590820312506			Unknown
OG0001599	397	577	2	122	99.49874686716792	17.453505007153076	41.97053726169844	2.659810695230178e-23	1.7844669954299263e-19	1.5122601656185817e-21	6	4	2	0.6875000000000002	0.6875000000000002	Afu3g07400		Reference-Containing Family
OG0001674	76	13	323	686	19.047619047619047	98.14020028612303	12.416289592760181	2.7989119983322224e-23	1.877790059681088e-19	1.5779748400681412e-21	16	11	9	0.21011352539062492	0.8036193847656252		Protein of unknown function (DUF3435)	Annotated Domain
OG0001465	5	134	394	565	1.2531328320802004	80.82975679542204	0.0535078	1.9079371167890698e-22	1.2800350116537869e-18	1.0666958430448223e-20	10	4	7	0.3437499999999999	0.7539062500000002		Amino acid permease	Annotated Domain
OG0001243	148	82	251	617	37.092731829573935	88.269	4.436692255368769	2.146386055052289e-22	1.4400104043345806e-18	1.1900912432517196e-20	21	16	10	0.026603698730468753	1		SMODS and SLOG-associating 2TM effector domain	Annotated Domain
OG0003116	25	206	374	493	6.265664160401002	70.52932761087267	0.15997352162400705	2.99049028311301e-22	2.0063199309405184e-18	1.644524533557802e-20	11	6	6	0.9999999999999997	0.9999999999999997	Afu1g01000	2OG-Fe(II) oxygenase superfamily	Reference-Containing Family
OG0000957	219	179	180	520	54.88721804511278	74.39198855507868	3.5344506517690877	5.699258815626774e-22	3.823632739404003e-18	3.10864450358049e-20	22	15	13	0.13380050659179688	0.5234670639038081			Unknown
OG0000981	68	314	331	385	17.042606516290725	55.07868383404863	0.25189062289529895	8.483580980416943e-22	5.691634479761727e-18	4.5900278062594575e-20	23	17	13	0.0346897	0.6776394844055175			Unknown
OG0003444	25	202	374	497	6.265664160401002	71.10157367668097	0.16446497590935563	1.765743599098846e-21	1.1846373806354157e-17	9.477099045083326e-20	13	6	9	0.26684570312499983	0.9999999999999999	Afu1g00930		Reference-Containing Family
OG0001577	1	108	398	591	0.2506265664160401	84.54935622317596	0.013749302065884981	2.2279056165788545e-21	1.4947018781627534e-17	1.186271331875201e-19	9	1	8	0.0390625	0.0390625			Unknown
OG0002498	153	472	246	227	38.34586466165413	32.474964234620884	0.29911637040099215	6.162722156968053e-21	4.134570295109867e-17	3.2555671615038324e-19	19	10	13	0.16706848144531244	1	Afu5g15060		Reference-Containing Family
OG0000880	242	220	157	479	60.6516	68.52646638054364	3.3560509554140125	7.371221462148967e-21	4.9453524789557414e-17	3.863556624184173e-19	21	17	10	0.00719738	1		Protein of unknown function (DUF3431)	Annotated Domain
OG0000810	222	575	177	124	55.639097744360896	17.739628040057227	0.27047899778924095	7.786301911182048e-21	5.223829952212036e-17	4.0494805831101055e-19	22	14	14	0.2862787246704102	0.2862787246704102	Afu5g06900		Reference-Containing Family
OG0001447	8	139	391	560	2.0050125313283207	80.11444921316166	0.0824302	1.0648755390963488e-20	7.144249991797405e-17	5.495576916767234e-19	14	6	8	0.7905273437500004	0.7905273437500004			Unknown
OG0000887	239	216	160	483	59.899749373433586	69.09871244635193	3.340190972222222	1.1139798511358157e-20	7.473690821270187e-17	5.705107497152814e-19	21	15	14	0.0783539	0.18924713134765628			Unknown
OG0001578	2	110	397	589	0.5012531328320802	84.26323319027182	0.026975	1.356743290058541e-20	9.102390733002752e-17	6.895750555305115e-19	9	2	7	0.17968750000000003	0.17968750000000003			Unknown
OG0006260	398	595	1	104	99.74937343358395	14.878397711015737	69.56638655462184	1.3706408780423625e-20	9.19562965078621e-17	6.914007256230233e-19	10	10	1	0.00195312	0.021484374999999997	Afu4g11120		Reference-Containing Family
OG0000903	90	355	309	344	22.55639097744361	49.213161659513595	0.2822371119923424	1.4981644118978937e-20	1.0051185039422969e-16	7.500884357778336e-19	20	14	12	0.11531829833984371	0.5034446716308595			Unknown
OG0002636	394	575	5	124	98.74686716791979	17.739628040057227	16.993391304347828	2.609310945408581e-20	1.750586713274617e-16	1.2967308987219385e-18	18	14	4	0.0308838	0.0308838	Afu5g00970		Reference-Containing Family
OG0000847	108	389	291	310	27.06766917293233	44.34907010014306	0.29576233005591923	2.950974013341562e-20	1.979808465550854e-16	1.4557415187873927e-18	18	14	9	0.0308838	1			Unknown
OG0001401	13	156	386	543	3.258145363408521	77.6824	0.1172279792746114	3.9122182363016345e-20	2.6247072147347667e-16	1.9158446822881507e-18	11	5	7	0.548828	0.9999999999999997			Unknown
OG0000818	122	414	277	285	30.576441102756892	40.772532188841204	0.3031967770627322	4.409525580744278e-20	2.958350712121336e-16	2.1437324000879244e-18	22	13	15	0.13380050659179688	0.5234670639038081			Unknown
OG0000993	107	385	292	314	26.81704260651629	44.92131616595136	0.29886141256004267	5.2940892597293644e-20	3.5518044843524307e-16	2.555255024713979e-18	20	10	14	0.11531829833984371	1	Afu4g01115		Reference-Containing Family
OG0001074	182	135	217	564	45.614035087719294	80.68669527896995	3.503942652329749	7.342559221098214e-20	4.926122981434792e-16	3.5186592724534225e-18	24	17	14	0.0639147	0.5412561893463136			Unknown
OG0001506	52	266	347	433	13.032581453634084	61.945636623748214	0.24393837619986566	7.83974130240762e-20	5.259682439785273e-16	3.7302712338902646e-18	14	9	9	0.4239501953124999	0.4239501953124999	Afu1g01070		Reference-Containing Family
OG0000518	385	541	14	158	96.49122807017544	22.603719599427755	8.031423290203326	8.174127110518129e-20	5.484021878446613e-16	3.8619872383426854e-18	15	7	11	0.11846923828124997	0.9999999999999997			Unknown
OG0001071	317	367	82	332	79.4486	47.4964	3.4971755167142953	1.8478951978374022e-19	1.2397528882291131e-15	8.669600616986805e-18	23	13	12	0.6776394844055175	0.9999999999999998	Afu8g06180	Fic/DOC family	Reference-Containing Family
OG0000745	152	462	247	237	38.095238095238095	33.90557939914164	0.3156843156843157	2.7385426679695755e-19	1.8372882759407883e-15	1.2758946360699919e-17	20	14	13	0.11531829833984371	0.2631759643554687			Unknown
OG0004026	307	666	92	33	76.94235588972431	4.721030042918455	0.16534469251860556	3.356941050183881e-19	2.2521717505683658e-15	1.5532218969437004e-17	18	8	13	0.0962524	0.8145294189453123	Afu7g00560	Fungal fruit body lectin	Reference-Containing Family
OG0001591	3	106	396	593	0.7518796992481203	84.83547925608012	0.042381360777587196	1.4296399314475893e-18	9.591454300081876e-15	6.569489246631422e-17	7	1	6	0.125	0.125			Unknown
OG0001658	73	19	326	680	18.295739348370926	97.28183118741059	8.014207297384566	1.4718381930903942e-18	9.874562437443455e-15	6.71738941322684e-17	16	9	8	0.8036193847656252	1			Unknown
OG0001363	118	61	281	638	29.57393483709273	91.27324749642347	4.392042471267721	2.0221826745139426e-18	1.3566823563314041e-14	9.166772677914892e-17	21	13	12	0.38331031799316395	0.6636238098144525			Unknown
OG0001590	3	105	396	594	0.7518796992481203	84.97854077253218	0.0428571	2.660144936881192e-18	1.7846912381535917e-14	1.1977793544654978e-16	7	2	5	0.4531249999999996	0.4531249999999996			Unknown
OG0000838	351	452	48	247	87.96992481203007	35.336194563662374	3.9959900442477876	3.701888381316661e-18	2.4835969150253476e-14	1.655731276683565e-16	18	14	6	0.0308838	0.23788452148437486	Afu3g02550	Protein of unknown function (DUF3435)	Reference-Containing Family
OG0000906	62	279	337	420	15.538847117794486	60.08583690987125	0.27695351137487634	5.72887720489139e-18	3.8435037167616334e-14	2.5453666998421415e-16	22	12	13	0.5234670639038081	0.831812			Unknown
OG0001367	117	62	282	637	29.32330827067669	91.13018597997139	4.262697323266987	5.8603138398430805e-18	3.931684555150723e-14	2.5866345757570547e-16	21	12	15	0.0783539	0.6636238098144525			Unknown
OG0001900	395	592	4	107	98.99749373433583	15.30758226037196	17.84839527027027	1.0219213475334684e-17	6.85607032060204e-14	4.451993714676649e-16	10	6	4	0.7539062500000002	0.7539062500000002	Afu3g03695		Reference-Containing Family
OG0001582	4	107	395	592	1.0025062656641603	84.69241773962804	0.0560274	1.0219213475334685e-17	6.85607032060204e-14	4.451993714676649e-16	7	2	5	0.4531249999999996	0.4531249999999996			Unknown
OG0001795	59	11	340	688	14.786967418546364	98.42632331902719	10.853475935828877	1.825695032668153e-17	1.2248587974170637e-13	7.902314822045572e-16	15	10	6	0.30175781250000017	0.6072387695312501			Unknown
OG0001289	27	187	372	512	6.7669172932330826	73.24749642346208	0.19872347766085907	1.9081686522355973e-17	1.2801903487848624e-13	8.206348389646554e-16	13	7	7	0.9999999999999999	0.9999999999999999			Unknown
OG0000525	259	608	140	91	64.91228070175438	13.01859799713877	0.27689144736842103	2.588300830368083e-17	1.736491027093947e-13	1.1060452401872272e-15	21	7	17	0.00719738	0.18924713134765628		Ankyrin repeats (3 copies)|Ankyrin repeats (3 copies)|Zinc knuckle|Phosphorylase superfamily|Retrotransposon gag protein|NACHT domain	Annotated Domain
OG0001329	123	72	276	627	30.82706766917293	89.69957081545064	3.8808876811594204	5.059049862934848e-17	3.394116553042989e-13	2.148175033571512e-15	22	16	12	0.052478790283203125	0.831812			Unknown
OG0001499	92	39	307	660	23.05764411027569	94.4206	5.071410674016537	5.531534354097384e-17	3.7111063981639353e-13	2.3340291812351794e-15	11	9	5	0.0654297	0.9999999999999997			Unknown
OG0001119	165	126	234	573	41.35338345864661	81.97424892703863	3.206654456654457	1.2182931850690854e-16	8.173528978628494e-13	5.108455611642809e-15	23	13	15	0.21003961563110343	0.6776394844055175			Unknown
OG0001342	22	167	377	532	5.513784461152882	76.10872675250357	0.1858987595101574	1.4861805098508058e-16	9.970785040589056e-13	6.193034186701277e-15	16	10	10	0.45449829101562506	0.45449829101562506			Unknown
OG0000988	198	176	201	523	49.62406015037594	74.8212	2.9272388059701493	3.9267469959893357e-16	2.6344545596092454e-12	1.626206518277312e-14	24	16	15	0.15158963203430173	0.3074562549591064			Unknown
OG0001204	199	520	200	179	49.87468671679198	25.608011444921313	0.3425096153846154	4.604133940635031e-16	3.0889134607720423e-12	1.895038932988983e-14	20	12	13	0.2631759643554687	0.5034446716308595	Afu5g14860|Afu5g15050	Cytochrome P450	Reference-Containing Family
OG0000778	149	435	250	264	37.34335839598997	37.76824034334764	0.3617103448275862	1.723114568121996e-15	1.156037563753047e-11	7.049009535079555e-14	22	16	12	0.052478790283203125	0.831812			Unknown
OG0001752	60	15	339	684	15.037593984962406	97.85407725321889	8.070796460176991	1.7441970745222096e-15	1.1701818172969504e-11	7.092011013920912e-14	13	10	4	0.0922852	0.26684570312499983			Unknown
OG0001179	42	216	357	483	10.526315789473683	69.09871244635193	0.2630718954248366	1.7748615542417334e-15	1.190754616740779e-11	7.173220582775777e-14	14	9	8	0.4239501953124999	0.7905273437500004			Unknown
OG0001969	44	5	355	694	11.027568922305765	99.28469241773963	17.20338028169014	2.3860604866523065e-15	1.6008079804950325e-11	9.585676529910375e-14	10	9	2	0.021484374999999997	0.10937500000000003			Unknown
OG0001459	96	48	303	651	24.06015037593985	93.13304721030042	4.297029702970297	3.4945616343796566e-15	2.3445014005053115e-11	1.3955365479198283e-13	14	12	6	0.012939453124999998	0.7905273437500004			Unknown
OG0001753	60	16	339	683	15.037593984962406	97.71101573676681	7.5553097345132745	4.496675050884966e-15	3.0168192916387234e-11	1.785100172567292e-13	19	13	8	0.16706848144531244	0.6476058959960938			Unknown
OG0001008	67	272	332	427	16.791979949874687	61.08726752503576	0.3168076718639263	5.635073585561334e-15	3.780570868553099e-11	2.2238652167959407e-13	14	9	9	0.4239501953124999	0.4239501953124999	Afu1g00890|Afu1g01090	Protein of unknown function (DUF3435)	Reference-Containing Family
OG0001627	2	83	397	616	0.5012531328320802	88.12589413447782	0.0373889	9.022515413194834e-15	6.053205590712414e-11	3.539886310358137e-13	7	2	6	0.125	0.4531249999999996		RNase H-like domain found in reverse transcriptase|Reverse transcriptase (RNA-dependent DNA polymerase)|Integrase zinc binding domain|Integrase core domain	Annotated Domain
OG0000017	386	572	13	127	96.74185463659147	18.168812589413445	6.592522861753631	1.7277799172303244e-14	1.1591675464698246e-10	6.739346200405957e-13	10	5	6	0.7539062500000002	1	Afu1g00230|Afu6g09390|Afu7g08630	Lipopolysaccharide kinase (Kdo/WaaP) family	Reference-Containing Family
OG0000996	192	176	207	523	48.1203	74.8212	2.756258234519104	2.1983282553224165e-14	1.4748584264958092e-10	8.525193216738782e-13	22	14	13	0.2862787246704102	0.5234670639038081			Unknown
OG0000072	287	630	112	69	71.9298	9.871244635193133	0.2806547619047619	2.8240349941801716e-14	1.894645077595477e-10	1.088876481376711e-12	19	7	15	0.019210815429687503	0.3592834472656249		Integrase zinc binding domain|RNase H-like domain found in reverse transcriptase|Reverse transcriptase (RNA-dependent DNA polymerase)	Annotated Domain
OG0001558	18	141	381	558	4.511278195488721	79.82832618025752	0.1869659909532585	3.44520711066991e-14	2.3113894505484424e-10	1.3207939717419671e-12	19	7	13	0.16706848144531244	0.3592834472656249	Afu8g06790		Reference-Containing Family
OG0000681	195	502	204	197	48.87218045112782	28.183118741058657	0.3751171783454418	4.832922064530917e-14	3.242407413093792e-10	1.8422769392578363e-12	22	14	16	0.052478790283203125	0.2862787246704102			Unknown
OG0000744	164	450	235	249	41.10275689223057	35.622317596566525	0.3861560283687943	1.0514966391926499e-13	7.054490952343488e-10	3.985588108668638e-12	22	17	13	0.016900539398193356	0.5234670639038081			Unknown
OG0000752	103	338	296	361	25.81453634085213	51.645207439198856	0.3716516072285303	1.351711089681485e-13	9.068629700673084e-10	5.094735786894991e-12	19	11	11	0.6476058959960938	0.6476058959960938			Unknown
OG0002236	31	1	368	698	7.769423558897243	99.85693848354794	58.79891304347826	2.323489551709335e-13	1.558829140241793e-09	8.708542682915044e-12	3	2	1	1	1			Unknown
OG0002682	229	549	170	150	57.393483709273184	21.45922746781116	0.3680488588878174	2.6828402041425997e-13	1.7999174929592702e-09	9.9995416275515e-12	21	13	12	0.38331031799316395	0.6636238098144525	Afu5g01930		Reference-Containing Family
OG0000590	350	480	49	219	87.71929824561403	31.330472103004293	3.2589285714285716	2.7972835954382605e-13	1.876697564179529e-09	1.0368494829721154e-11	18	11	10	0.48068237304687483	0.8145294189453123			Unknown
OG0000642	193	494	206	205	48.370927318295735	29.32761087267525	0.38879171416217917	2.974055670088537e-13	1.9952939490623995e-09	1.0949848776729253e-11	23	12	15	0.21003961563110343	0.9999999999999998			Unknown
OG0000709	84	297	315	402	21.052631578947366	57.5107	0.36094276094276095	2.9867675154888256e-13	2.003822326141453e-09	1.0949848776729253e-11	18	10	13	0.0962524	0.8145294189453123		RNase H-like domain found in reverse transcriptase|Chromo (CHRromatin Organisation MOdifier) domain|Integrase zinc binding domain	Annotated Domain
OG0000617	336	447	63	252	84.21052631578947	36.05150214592275	3.0067114093959733	3.332056068713527e-13	2.235476416499905e-09	1.2149328350542963e-11	18	10	13	0.0962524	0.8145294189453123		GAG-pre-integrase domain|Reverse transcriptase (RNA-dependent DNA polymerase)	Annotated Domain
OG0000757	160	439	239	260	40.100250626566414	37.19599427753934	0.3964887868014983	5.153771618999198e-13	3.457665379186562e-09	1.8690083130738172e-11	22	17	14	0.016900539398193356	0.2862787246704102		Yos1-like	Annotated Domain
OG0000643	220	534	179	165	55.13784461152882	23.605150214592275	0.37976272675914885	5.283020544659432e-13	3.5443784834120133e-09	1.905579829791405e-11	22	16	15	0.052478790283203125	0.13380050659179688			Unknown
OG0001448	93	53	306	646	23.308270676691727	92.41773962804005	3.7044025157232703	6.197502894874526e-13	4.15790469217132e-09	2.223478445011401e-11	16	9	10	0.45449829101562506	0.8036193847656252		Alcohol dehydrogenase GroES-like domain	Annotated Domain
OG0001237	119	84	280	615	29.82456140350877	87.98283261802575	3.111607142857143	9.140512946424302e-13	6.1323701357560645e-09	3.261899008380885e-11	19	11	11	0.6476058959960938	0.6476058959960938			Unknown
OG0000059	338	455	61	244	84.71177944862156	34.90701001430615	2.9714285714285715	9.449343061798197e-13	6.33956426016041e-09	3.354266804317677e-11	20	12	10	0.5034446716308595	1	Afu1g00680|Afu8g06310	Patatin-like phospholipase	Reference-Containing Family
OG0001221	136	106	263	593	34.08521303258145	84.83547925608012	2.8928904512518834	1.0369325807252668e-12	6.9567806840858146e-09	3.6614635179399025e-11	24	16	15	0.15158963203430173	0.3074562549591064			Unknown
OG0000955	199	197	200	502	49.87468671679198	71.81688125894135	2.535482233502538	1.2343808378954813e-12	8.281461041440784e-09	4.335843477194128e-11	23	16	15	0.0931396	0.21003961563110343			Unknown
OG0003925	392	605	7	94	98.24561403508771	13.447782546494993	8.700826446280992	1.2630171522933825e-12	8.473582074736302e-09	4.4133239972584905e-11	10	6	4	0.7539062500000002	0.7539062500000002	Afu2g17305		Reference-Containing Family
OG0002299	29	1	370	698	7.268170426065162	99.85693848354794	54.70810810810811	1.8202400270952367e-12	1.2211990341781944e-08	6.327456135638312e-11	7	6	1	0.125	0.125			Unknown
OG0001159	304	385	95	314	76.19047619047619	44.92131616595136	2.6098701298701297	1.8545250151308158e-12	1.2442008326512643e-08	6.413406353872496e-11	22	16	13	0.052478790283203125	0.5234670639038081	Afu8g02230		Reference-Containing Family
OG0001403	102	65	297	634	25.563909774436087	90.70100143061516	3.34981	1.928469118564716e-12	1.2938099316450679e-08	6.634922726384963e-11	21	13	11	0.38331031799316395	1			Unknown
OG0000610	239	559	160	140	59.899749373433586	20.028612303290416	0.3741055456171735	2.004862671917079e-12	1.3450623665891682e-08	6.862563094842695e-11	23	14	14	0.4048728942871095	0.4048728942871095			Unknown
OG0001433	24	149	375	550	6.015037593984962	78.6838	0.23624161073825503	2.14333419113193e-12	1.4379629088304117e-08	7.29930410573813e-11	20	13	11	0.2631759643554687	0.8238029479980463	Afu2g00300		Reference-Containing Family
OG0002400	26	0	373	699	6.516290726817042	100	inf	2.1759770119812197e-12	1.4598629773382003e-08	7.37304534009192e-11	1	1	0	1	1			Unknown
OG0001989	40	7	359	692	10.025062656641603	98.99856938483548	11.014723438121766	2.6439972923664527e-12	1.773857783448653e-08	8.913858208284689e-11	8	6	3	0.2890624999999999	0.7265625000000002		Galactose oxidase-like Early set domain	Annotated Domain
OG0001373	26	152	373	547	6.516290726817042	78.2546	0.25084662057287993	4.434230037648412e-12	2.9749249322583194e-08	1.4874624661291596e-10	18	12	10	0.23788452148437486	0.8145294189453123			Unknown
OG0001893	0	57	399	642	0	91.84549356223177	0	5.1569722295585625e-12	3.4598126688108394e-08	1.7212998352292732e-10	7	0	7	0.015625	0.015625			Unknown
OG0001052	71	261	328	438	17.794486215538846	62.66094420600859	0.3632604429492571	5.866659904987318e-12	3.935942130255992e-08	1.9484862030970256e-10	18	14	8	0.0308838	0.8145294189453123			Unknown
OG0002063	357	505	42	194	89.47368421052632	27.753934191702434	3.265346534653465	5.9290943659352805e-12	3.9778294101059794e-08	1.9595218768994973e-10	13	7	8	0.581055	0.9999999999999999	Afu3g03340		Reference-Containing Family
OG0000830	243	275	156	424	60.902255639097746	60.65808297567954	2.4016783216783217	6.156819775654537e-12	4.1306103874866294e-08	2.0248090134738378e-10	22	19	13	0.000855446	0.5234670639038081			Unknown
OG0000574	264	590	135	109	66.16541353383458	15.593705293276109	0.36128060263653483	6.758765122217977e-12	4.534455520496041e-08	2.2119295221931907e-10	19	14	13	0.0635681	0.16706848144531244			Unknown
OG0001550	78	41	321	658	19.548872180451127	94.13447782546494	3.8997036699338956	7.88779259687732e-12	5.291920053244994e-08	2.56889322973058e-10	19	12	11	0.3592834472656249	0.6476058959960938		Ankyrin repeat	Annotated Domain
OG0001161	142	119	257	580	35.58897243107769	82.97567954220315	2.692999378739823	8.018816690102297e-12	5.3798241173896305e-08	2.598948848980498e-10	21	10	15	0.0783539	1			Unknown
OG0001424	95	60	304	639	23.809523809523807	91.41630901287554	3.32812	1.0527371652227136e-11	7.062813641479185e-08	3.3955834814803774e-10	21	12	12	0.6636238098144525	0.6636238098144525			Unknown
OG0000737	173	451	226	248	43.35839598997494	35.47925608011445	0.42093283362439415	1.5175588593682782e-11	1.0181302387501778e-07	4.871436549043913e-10	20	12	14	0.11531829833984371	0.5034446716308595			Unknown
OG0002402	62	26	337	673	15.538847117794486	96.28040057224607	4.76215	1.5348378613233744e-11	1.0297227211618519e-07	4.903441529342151e-10	12	8	8	0.3876953125000001	0.3876953125000001	Afu1g16170|Afu5g15040	Protein of unknown function (DUF3435)	Reference-Containing Family
OG0000685	303	390	96	309	75.93984962406014	44.20600858369099	2.500721153846154	1.7039306969356665e-11	1.1431671045741387e-07	5.417853576180752e-10	22	13	14	0.2862787246704102	0.5234670639038081			Unknown
OG0000704	287	359	112	340	71.9298	48.640915593705294	2.4268802228412256	1.8412508946888638e-11	1.2352952252467588e-07	5.826864270031881e-10	20	12	14	0.11531829833984371	0.5034446716308595			Unknown
OG0001240	41	187	358	512	10.275689223057643	73.24749642346208	0.3135661577988229	1.8793010061936815e-11	1.2608230450553409e-07	5.919357019039159e-10	19	13	12	0.16706848144531244	0.3592834472656249			Unknown
OG0001856	1	60	398	639	0.2506265664160401	91.41630901287554	0.026758793969849246	1.9987420056314427e-11	1.3409560115781348e-07	6.266149586813714e-10	8	1	7	0.0703125	0.0703125			Unknown
OG0003146	176	455	223	244	44.11027568922306	34.90701001430615	0.42324	2.1581489887706586e-11	1.447902156566235e-07	6.73442863519179e-10	20	12	14	0.11531829833984371	0.5034446716308595	Afu3g15170	Probable molybdopterin binding domain|MoeA C-terminal region (domain IV)|MoeA N-terminal region (domain I and II)	Reference-Containing Family
OG0000677	305	395	94	304	76.44110275689223	43.490701001430615	2.4971720980339347	2.2619579544564777e-11	1.517547591644851e-07	7.025683294652087e-10	18	12	11	0.23788452148437486	0.48068237304687483	Afu1g09757		Reference-Containing Family
OG0001056	72	258	327	441	18.045112781954884	63.0901	0.3763601450821421	2.3981137791043474e-11	1.6088945344011068e-07	7.41426052719404e-10	20	14	11	0.11531829833984371	0.8238029479980463			Unknown
OG0000904	110	335	289	364	27.56892230576441	52.07439198855508	0.41357227702318855	2.574309061171276e-11	1.727103949139809e-07	7.922495179540409e-10	22	17	12	0.016900539398193356	0.831812			Unknown
OG0000913	210	224	189	475	52.63157894736842	67.95422031473534	2.3561507936507935	3.094281239315727e-11	2.0759532834569214e-07	9.479238737246217e-10	21	11	13	0.38331031799316395	1			Unknown
OG0000613	239	551	160	148	59.899749373433586	21.17310443490701	0.40122504537205084	3.8203926914193304e-11	2.563101456673229e-07	1.1650461166696494e-09	20	15	12	0.0413895	0.5034446716308595			Unknown
OG0005713	372	550	27	149	93.23308270676691	21.316165951359086	3.7325252525252526	3.9927815204556386e-11	2.678757122073688e-07	1.2121072950559674e-09	12	5	7	0.7744140625000003	0.7744140625000003	Afu2g00850		Reference-Containing Family
OG0001818	2	64	397	635	0.5012531328320802	90.84406294706724	0.0499843	5.0485372812436314e-11	3.3870636619863525e-07	1.5227929274196346e-09	7	2	6	0.125	0.4531249999999996			Unknown
OG0002296	28	2	371	697	7.017543859649122	99.71387696709584	26.30188679245283	5.061601174758958e-11	3.395828228145785e-07	1.5227929274196346e-09	9	7	2	0.17968750000000003	0.17968750000000003			Unknown
OG0000523	372	551	27	148	93.23308270676691	21.17310443490701	3.700746118168986	6.375577421934808e-11	4.277374892376063e-07	1.909542362667885e-09	17	11	10	0.33230590820312506	0.629059		Transmembrane amino acid transporter protein	Annotated Domain
OG0000656	218	518	181	181	54.63659147869674	25.894134477825464	0.42084942084942084	7.484730475433606e-11	5.021505675968407e-07	2.2317803004304028e-09	23	19	13	0.00259948	0.6776394844055175			Unknown
OG0002264	179	456	220	243	44.86215538847117	34.763948497854074	0.4335825358851675	7.544134327002623e-11	5.061359719986059e-07	2.239539699108876e-09	20	12	14	0.11531829833984371	0.5034446716308595	Afu3g15190	Molydopterin dinucleotide binding domain|Molybdopterin oxidoreductase	Reference-Containing Family
OG0000535	288	616	111	83	72.18045112781954	11.874105865522175	0.3495963495963496	7.78419130568685e-11	5.222413946985308e-07	2.3006228841344967e-09	22	14	14	0.2862787246704102	0.2862787246704102	Afu5g12130	Ras family	Reference-Containing Family
OG0000679	204	496	195	203	51.127819548872175	29.0415	0.4281637717121588	8.342210441726683e-11	5.596788985354432e-07	2.4547320111203648e-09	22	13	18	0.00434351	0.5234670639038081			Unknown
OG0001852	47	15	352	684	11.779448621553884	97.85407725321889	6.088636363636364	9.115086483414336e-11	6.115311521722678e-07	2.670441712542654e-09	13	9	8	0.26684570312499983	0.581055			Unknown
OG0000546	364	532	35	167	91.22807017543859	23.89127324749642	3.264661654135338	1.0011315662504778e-10	6.716591677974455e-07	2.9202572512932414e-09	20	15	13	0.0413895	0.2631759643554687			Unknown
OG0002116	25	1	374	698	6.265664160401002	99.85693848354794	46.657754010695186	1.0791449630539979e-10	7.239983557129272e-07	3.134192016073278e-09	2	1	1	1	1		Phosphopantetheine attachment site|AMP-binding enzyme	Annotated Domain
OG0000475	385	591	14	108	96.49122807017544	15.450643776824036	5.025380710659898	1.1378987343099253e-10	7.634162608485289e-07	3.290587331243659e-09	16	9	9	0.8036193847656252	0.8036193847656252	Afu8g02335		Reference-Containing Family
OG0003745	372	697	27	2	93.23308270676691	0.28612303290414876	0.0395345	1.359473989246938e-10	9.120710993857707e-07	3.91446823770717e-09	4	2	3	0.625	1	Afu7g06890	DyP dimeric alpha+beta barrel domain|Dyp-type peroxidase C-terminal	Reference-Containing Family
OG0001192	135	116	264	583	33.83458646616541	83.40486409155938	2.570043103448276	1.457293334491681e-10	9.776980981104686e-07	4.178197000472088e-09	23	16	15	0.0931396	0.21003961563110343			Unknown
OG0001218	131	111	268	588	32.83208020050125	84.12017167381974	2.589350544574425	1.4732925988448964e-10	9.88432004565041e-07	4.206093636446983e-09	20	9	15	0.0413895	0.8238029479980463			Unknown
OG0000941	198	210	201	489	49.62406015037594	69.95708154506438	2.293816631130064	1.641526868420099e-10	1.1013003760230444e-06	4.666527017046798e-09	23	15	15	0.21003961563110343	0.21003961563110343			Unknown
OG0001445	399	650	0	49	100	7.0100143061516444	inf	1.6845262289890565e-10	1.130148647028758e-06	4.768559692104464e-09	6	6	0	0.03125	0.03125	Afu3g00130		Reference-Containing Family
OG0001561	13	103	386	596	3.258145363408521	85.26466380543634	0.1948790180592585	1.8688913867342663e-10	1.2538392313600192e-06	5.268232064537895e-09	16	10	8	0.45449829101562506	1		DJ-1/PfpI family	Annotated Domain
OG0000528	293	620	106	79	73.43358395989975	11.301859799713878	0.3522063298843579	1.9749760250216797e-10	1.325011415187045e-06	5.543980816682197e-09	19	11	15	0.019210815429687503	0.6476058959960938		Bestrophin RFP-TM chloride channel	Annotated Domain
OG0001492	79	47	320	652	19.799498746867165	93.27610872675251	3.4247340425531916	2.1792749009194816e-10	1.4620755310268802e-06	6.091981379278667e-09	17	12	11	0.14346313476562497	0.33230590820312506			Unknown
OG0001311	36	166	363	533	9.022556390977442	76.25178826895565	0.3184307477845265	3.109241074517115e-10	2.0859898368935325e-06	8.655559489184782e-09	19	9	13	0.16706848144531244	1			Unknown
OG0000527	369	548	30	151	92.4812	21.602288984263232	3.3892335766423356	3.7988746109004256e-10	2.5486649764530956e-06	1.0531673456417751e-08	19	11	13	0.16706848144531244	0.6476058959960938			Unknown
OG0000701	134	371	265	328	33.583959899749374	46.924177396280406	0.44705284036006715	4.100201786703188e-10	2.750825378699169e-06	1.1320269048144729e-08	22	13	15	0.13380050659179688	0.5234670639038081		DDE superfamily endonuclease|GAG-pre-integrase domain|Tc5 transposase DNA-binding domain|Reverse transcriptase (RNA-dependent DNA polymerase)|hAT family C-terminal dimerisation region	Annotated Domain
OG0000462	309	638	90	61	77.44360902255639	8.726752503576538	0.3282654127481714	5.166442923159853e-10	3.4661665571479454e-06	1.4205600644048956e-08	13	7	8	0.581055	0.9999999999999999	Afu7g08270	Protein of unknown function (DUF3435)	Reference-Containing Family
OG0001360	30	149	369	550	7.518796992481203	78.6838	0.3001036721776614	5.865919707085482e-10	3.93544553148365e-06	1.606304298564755e-08	19	9	13	0.16706848144531244	1			Unknown
OG0000905	199	216	200	483	49.87468671679198	69.09871244635193	2.2249305555555554	6.725030323735958e-10	4.511822844194454e-06	1.8340743269083146e-08	20	9	15	0.0413895	0.8238029479980463			Unknown
OG0001356	18	116	381	583	4.511278195488721	83.40486409155938	0.23744230247081183	7.045873624997189e-10	4.727076615010614e-06	1.9095590390706146e-08	14	7	8	0.7905273437500004	1			Unknown
OG0000556	282	603	117	96	70.67669172932331	13.733905579399142	0.38372241357315984	7.058736647630234e-10	4.735706416895124e-06	1.9095590390706146e-08	23	13	15	0.21003961563110343	0.6776394844055175			Unknown
OG0001225	128	111	271	588	32.08020050125313	84.12017167381974	2.5020444799042587	8.531758448937542e-10	5.723956743392197e-06	2.2986024795131876e-08	20	14	11	0.11531829833984371	0.8238029479980463			Unknown
OG0001788	4	67	395	632	1.0025062656641603	90.41487839771102	0.0955224	8.565369203730763e-10	5.746506198782969e-06	2.2986024795131876e-08	11	4	8	0.22656250000000003	0.548828			Unknown
OG0002374	39	11	360	688	9.774436090225564	98.42632331902719	6.775757575757575	9.90941801768706e-10	6.648228548066248e-06	2.6486966326957163e-08	10	8	3	0.10937500000000003	0.3437499999999999	Afu1g16090|Afu5g15000	Low molecular weight phosphotyrosine protein phosphatase	Reference-Containing Family
OG0000845	123	348	276	351	30.82706766917293	50.21459227467812	0.44949400299850073	1.0056797799971148e-09	6.747105644000644e-06	2.67742287460343e-08	22	16	13	0.052478790283203125	0.5234670639038081		Beta-ketoacyl synthase N-terminal domain	Annotated Domain
OG0004009	399	654	0	45	100	6.437768240343347	inf	1.0276755588735274e-09	6.8946753244824955e-06	2.7251681124436742e-08	7	7	0	0.015625	0.015625	Afu6g00650		Reference-Containing Family
OG0000616	241	545	158	154	60.40100250626567	22.031473533619454	0.43100685170131225	1.1255398746997874e-09	7.5512470193608735e-06	2.9729318973861708e-08	25	16	14	0.22952294349670388	0.690038			Unknown
OG0001270	111	89	288	610	27.819548872180448	87.26752503576537	2.641619850187266	1.1733962298111084e-09	7.872315305802726e-06	3.087182472863814e-08	16	10	10	0.45449829101562506	0.45449829101562506			Unknown
OG0002609	20	0	379	699	5.012531328320802	100	inf	1.182361912056791e-09	7.932466067989011e-06	3.0986195578082076e-08	3	3	0	0.25	0.25		Phosphotransferase enzyme family	Annotated Domain
OG0002098	33	7	366	692	8.270676691729323	98.99856938483548	8.913348946135832	1.4029489510858587e-09	9.412384512835027e-06	3.662406425227637e-08	8	6	3	0.2890624999999999	0.7265625000000002		Common central domain of tyrosinase	Annotated Domain
OG0001090	69	238	330	461	17.293233082706767	65.95135908440629	0.40500381970970206	1.4756516035703285e-09	9.900146608353335e-06	3.8372661272687345e-08	20	13	13	0.2631759643554687	0.2631759643554687			Unknown
OG0001417	93	67	306	632	23.308270676691727	90.41487839771102	2.8668422592917766	1.4901640883191036e-09	9.997510868532865e-06	3.860042806383346e-08	18	12	11	0.23788452148437486	0.48068237304687483			Unknown

## Sheet: cluster5
Orthogroup	Number_pos_present_in	Number_neg_present_in	Number_pos_not_present_in	Number_neg_not_present_in	Sensitivity	Specificity	Odds_ratio	Naive_p	Bonferroni_p	Benjamini_H_p	Max_Pairwise_comparisons	Max_supporting_pairs	Max_opposing_pairs	Best_pairwise_comp_p	Worst_pairwise_comp_p	Af293 Reference	Pfam Domain(s)	Annotation Class
OG0001078	170	145	29	754	85.42713567839196	83.87096774193549	30.482758620689655	4.2808829903442373e-79	2.872044398221949e-75	2.872044398221949e-75	14	11	7	0.057373	1		RNase H	Annotated Domain
OG0005808	46	774	153	125	23.115577889447238	13.904338153503893	0.048555167114218645	2.177533888595379e-67	1.4609074858586399e-63	7.304537429293199e-64	14	4	12	0.012939453124999998	0.17956542968750003	Afu2g08680		Reference-Containing Family
OG0001356	103	31	96	868	51.75879396984925	96.55172413793103	30.041666666666668	3.785634961685871e-60	2.539782495795051e-56	8.465941652650169e-57	12	7	5	0.7744140625000003	0.7744140625000003			Unknown
OG0000905	174	241	25	658	87.43718592964824	73.1924	19.002821576763484	3.106923515463166e-58	2.084434986524238e-54	5.211087466310595e-55	15	12	5	0.035156250000000014	0.30175781250000017			Unknown
OG0000764	188	327	11	572	94.47236180904522	63.62625139043382	29.896024464831804	1.1652729469082552e-56	7.817816200807484e-53	1.5635632401614968e-53	13	11	3	0.022460937500000003	0.0922852			Unknown
OG0001395	104	48	95	851	52.26130653266332	94.6607	19.40877192982456	2.7113133284477728e-52	1.8190201120556108e-48	3.0317001867593515e-49	14	11	4	0.057373	0.17956542968750003			Unknown
OG0000935	166	236	33	663	83.41708542713567	73.74860956618465	14.131741140215716	2.2376719551775655e-51	1.5012541147286287e-47	2.1446487353266123e-48	8	5	3	0.7265625000000002	0.7265625000000002			Unknown
OG0001430	102	47	97	852	51.256281407035175	94.77196885428253	19.062075016450976	4.3525047441572173e-51	2.9200954328550774e-47	3.6501192910688467e-48	14	11	4	0.057373	0.17956542968750003			Unknown
OG0000729	182	332	17	567	91.4573	63.07007786429366	18.28384124734231	1.3205853686644995e-48	8.859807238370127e-45	9.844230264855697e-46	12	10	2	0.038574218750000014	0.038574218750000014		Phosphotransferase enzyme family|Fungal protein kinase|Fungal protein kinase|Protein of unknown function (DUF3435)	Annotated Domain
OG0004755	199	486	0	413	100	45.93993325917686	inf	4.721902792506863e-47	3.1679245834928545e-43	3.1679245834928545e-44	4	4	0	0.125	0.125	Afu1g16900	Fungal specific transcription factor domain	Reference-Containing Family
OG0002636	109	860	90	39	54.773869346733676	4.338153503893214	0.0549225	4.7031196278297925e-45	3.155322958311008e-41	2.8684754166463708e-42	13	3	10	0.0922852	0.0922852	Afu5g00970		Reference-Containing Family
OG0000737	27	597	172	302	13.5678	33.59288097886541	0.0794087	3.12431502013163e-44	2.0961029470063105e-40	1.746752455838592e-41	13	7	9	0.26684570312499983	0.9999999999999999			Unknown
OG0002264	29	606	170	293	14.572864321608039	32.59176863181313	0.0824791	5.172105032843838e-44	3.469965266534931e-40	2.669204051180716e-41	13	7	9	0.26684570312499983	0.9999999999999999	Afu3g15190	Molydopterin dinucleotide binding domain|Molybdopterin oxidoreductase	Reference-Containing Family
OG0003146	29	602	170	297	14.572864321608039	33.03670745272525	0.0841606	2.7152554322256744e-43	1.821664869480205e-39	1.3011891924858606e-40	13	7	9	0.26684570312499983	0.9999999999999999	Afu3g15170	Probable molybdopterin binding domain|MoeA C-terminal region (domain IV)|MoeA N-terminal region (domain I and II)	Reference-Containing Family
OG0001360	105	74	94	825	52.76381909547738	91.7686	12.453277745830936	5.388412418375975e-43	3.615085891488442e-39	2.4100572609922947e-40	14	12	4	0.012939453124999998	0.17956542968750003			Unknown
OG0003486	48	679	151	220	24.120603015075375	24.47163515016685	0.10299525012435506	8.846826292439648e-42	5.93533575959776e-38	3.7095848497486e-39	12	7	9	0.14599609375000003	0.7744140625000003	Afu3g13190		Reference-Containing Family
OG0000956	2	397	197	502	1.0050251256281406	55.83982202447163	0.012837397230497769	8.579811571298771e-41	5.7561955831843455e-37	3.3859974018731446e-38	5	2	4	0.375	1		Fungal WD-like	Annotated Domain
OG0001596	129	877	70	22	64.82412060301507	2.4471635150166855	0.046229	5.289135109826834e-38	3.5484807451828233e-34	1.9713781917682353e-35	12	5	7	0.7744140625000003	0.7744140625000003	Afu5g09770		Reference-Containing Family
OG0002498	34	591	165	308	17.08542713567839	34.260289210233594	0.10738860688099267	5.563524762141771e-37	3.732568762920914e-33	1.9645098752215338e-34	11	6	6	0.9999999999999997	0.9999999999999997	Afu5g15060		Reference-Containing Family
OG0003357	187	458	12	441	93.96984924623115	49.05450500556173	15.004912663755459	2.313958598200966e-34	1.552434823533028e-30	7.76217411766514e-32	9	7	2	0.17968750000000003	0.17968750000000003	Afu3g00100	Endoribonuclease L-PSP|Flavin containing amine oxidoreductase	Reference-Containing Family
OG0004910	40	597	159	302	20.100502512562816	33.59288097886541	0.12726104316129916	1.6440117100119507e-33	1.1029674562470177e-29	5.252225982128655e-31	12	5	9	0.14599609375000003	0.7744140625000003	Afu3g02585		Reference-Containing Family
OG0002769	41	602	158	297	20.603015075376884	33.03670745272525	0.12802262500525674	2.4532060309803218e-33	1.645855926184698e-29	7.4811633008395365e-31	12	5	9	0.14599609375000003	0.7744140625000003	Afu3g02590	Fungal Zn(2)-Cys(6) binuclear cluster domain	Reference-Containing Family
OG0002117	4	362	195	537	2.0100502512562812	59.733036707452726	0.030429239269018273	4.868874678984588e-33	3.2665280221307604e-29	1.4202295748394611e-30	6	4	3	0.6875000000000002	1	Afu1g01080		Reference-Containing Family
OG0000995	69	712	130	187	34.67336683417086	20.800889877641822	0.13940146931719966	6.348187759863488e-33	4.2589991680924137e-29	1.7745829867051725e-30	13	9	6	0.26684570312499983	0.9999999999999999	Afu8g06340		Reference-Containing Family
OG0004308	41	597	158	302	20.603015075376884	33.59288097886541	0.13126815512159956	1.102904277950862e-32	7.399384800772333e-29	2.9087418938824943e-30	12	5	9	0.14599609375000003	0.7744140625000003	Afu3g02560		Reference-Containing Family
OG0002876	42	601	157	298	21.105527638190953	33.14794215795328	0.13264516676028276	1.1272512929042308e-32	7.562728924094485e-29	2.9087418938824943e-30	12	4	10	0.038574218750000014	0.3876953125000001	Afu3g02600		Reference-Containing Family
OG0000824	23	502	176	397	11.557788944723619	44.16017797552836	0.10334797174936618	1.2161033343529762e-32	8.158837270174118e-29	3.0217915815459696e-30	13	6	9	0.26684570312499983	0.9999999999999999			Unknown
OG0000765	24	496	175	403	12.060301507537687	44.827586206896555	0.11142857142857143	3.9111008233904266e-31	2.623957542412637e-27	9.37127693718799e-29	13	6	8	0.581055	0.9999999999999999			Unknown
OG0002780	197	576	2	323	98.99497487437185	35.92880978865406	55.23524305555556	5.896098471349429e-31	3.955692464428332e-27	1.3640318842856317e-28	6	4	2	0.6875000000000002	0.6875000000000002	Afu6g14630		Reference-Containing Family
OG0000862	19	462	180	437	9.547738693467336	48.60956618464961	0.0998437	1.0100480840034417e-30	6.776412595579091e-27	2.258804198526364e-28	6	3	4	0.6875000000000002	1			Unknown
OG0002638	197	582	2	317	98.99497487437185	35.26140155728587	53.65034364261168	2.969774204073118e-30	1.9924215135126548e-26	6.427166172621467e-28	6	4	2	0.6875000000000002	0.6875000000000002	Afu6g14620	Alpha-L-arabinofuranosidase B (ABFB) domain|Alpha-L-arabinofuranosidase B catalytic	Reference-Containing Family
OG0000848	20	464	179	435	10.050251256281408	48.38709677419355	0.10474860335195531	3.675861814535824e-30	2.4661356913720843e-26	7.7066740355377635e-28	6	3	4	0.6875000000000002	1		HNH endonuclease	Annotated Domain
OG0000992	7	366	192	533	3.5175879396984926	59.288097886540605	0.053093693078324226	5.804131813640181e-30	3.8939920337711974e-26	1.179997585991272e-27	7	3	4	0.9999999999999998	0.9999999999999998			Unknown
OG0000701	162	343	37	556	81.407	61.846496106785324	7.09731	1.513367871636851e-29	1.0153185050811633e-25	2.9862308972975394e-27	15	9	9	0.6072387695312501	0.6072387695312501		DDE superfamily endonuclease|GAG-pre-integrase domain|Tc5 transposase DNA-binding domain|Reverse transcriptase (RNA-dependent DNA polymerase)|hAT family C-terminal dimerisation region	Annotated Domain
OG0000817	167	372	32	527	83.91959798994975	58.620689655172406	7.393229166666667	3.2620859959639116e-29	2.1885334946921883e-25	6.252952841977681e-27	13	10	4	0.0922852	0.26684570312499983			Unknown
OG0001087	2	307	197	592	1.0050251256281406	65.85094549499443	0.019577	5.76401869953729e-29	3.867080145519568e-25	1.0741889293109911e-26	6	2	4	0.6875000000000002	0.6875000000000002		Ankyrin repeats (3 copies)	Annotated Domain
OG0000795	170	391	29	508	85.42713567839196	56.50723025583982	7.616191904047976	7.664506757207335e-29	5.142117583410401e-25	1.389761509029838e-26	13	9	5	0.26684570312499983	0.581055	Afu3g06901	SecE/Sec61-gamma subunits of protein translocation complex	Reference-Containing Family
OG0000668	189	522	10	377	94.9749	41.935483870967744	13.65	5.1031298528901555e-28	3.4236898183040055e-24	9.009710048168435e-26	8	5	3	0.7265625000000002	0.7265625000000002			Unknown
OG0001204	62	657	137	242	31.155778894472363	26.918798665183534	0.16669444166694442	6.666696437059286e-28	4.472686639623075e-24	1.1468427281084809e-25	14	7	8	0.7905273437500004	1	Afu5g14860|Afu5g15050	Cytochrome P450	Reference-Containing Family
OG0000966	34	526	165	373	17.08542713567839	41.490545050055616	0.14612282521027767	1.3772014638310601e-27	9.239644620842582e-24	2.309911155210646e-25	13	8	9	0.26684570312499983	0.581055	Afu1g00570|Afu1g00940|Afu7g07110|Afu7g08410	DDE superfamily endonuclease	Reference-Containing Family
OG0001201	104	134	95	765	52.26130653266332	85.09454949944383	6.2498	7.236313911559836e-27	4.8548430032654944e-23	1.1841080495769498e-24	15	11	5	0.11846923828124997	0.30175781250000017			Unknown
OG0000458	85	733	114	166	42.71356783919598	18.46496106785317	0.16885665733228022	1.1206609765419103e-26	7.518514491619676e-23	1.7901224980046845e-24	14	10	6	0.17956542968750003	0.7905273437500004			Unknown
OG0001099	3	295	196	604	1.507537688442211	67.18576195773082	0.0313386	3.8195506753308023e-26	2.562536548079435e-22	5.9593873211149656e-24	5	2	4	0.375	1			Unknown
OG0001532	197	615	2	284	98.99497487437185	31.590656284760843	45.486178861788616	3.9649842216951825e-26	2.660107914335298e-22	6.045699805307495e-24	6	4	2	0.6875000000000002	0.6875000000000002	Afu3g07730		Reference-Containing Family
OG0001160	1	268	198	631	0.5025125628140703	70.18909899888766	0.011891301070405548	6.81190357143604e-26	4.570106106076439e-22	1.0155791346836532e-23	4	1	3	0.625	0.625			Unknown
OG0001959	153	887	46	12	76.88442211055276	1.3348164627363739	0.0449978	9.701823590147645e-26	6.508953446630055e-22	1.414989879702186e-23	9	4	6	0.507812	1	Afu2g00440		Reference-Containing Family
OG0000915	18	416	181	483	9.045226130653267	53.726362625139046	0.1154643008924777	1.1920425246290489e-25	7.997413297736288e-22	1.7015772973906997e-23	10	2	8	0.10937500000000003	0.10937500000000003			Unknown
OG0000760	42	551	157	348	21.105527638190953	38.70967741935484	0.16895742541066042	2.315527695298169e-25	1.5534875307755416e-21	3.2364323557823786e-23	14	6	11	0.057373	0.7905273437500004			Unknown
OG0000635	70	672	129	227	35.175879396984925	25.25027808676307	0.18330103359173128	2.6787566837474165e-25	1.7971778591261415e-21	3.667709916583962e-23	14	9	6	0.4239501953124999	0.7905273437500004	Afu1g01050|Afu7g08320|Afu8g06160	HSF-type DNA-binding	Reference-Containing Family
OG0001506	6	312	193	587	3.015075376884422	65.29477196885428	0.0584894	1.808850790142199e-24	1.2135579951064013e-20	2.4271159902128025e-22	6	4	3	0.6875000000000002	1	Afu1g01070		Reference-Containing Family
OG0001138	3	279	196	620	1.507537688442211	68.96551724137932	0.034013605442176874	2.6199027253211413e-24	1.7576927384179536e-20	3.4464563498391244e-22	4	2	2	1	1			Unknown
OG0001052	8	324	191	575	4.0201005025125625	63.95995550611791	0.0743326	9.447928342687224e-24	6.338615125108858e-20	1.218964447136319e-21	11	5	7	0.548828	0.9999999999999997			Unknown
OG0000550	25	440	174	459	12.562814070351758	51.05672969966629	0.14988244514106583	2.4953197387025326e-23	1.674110012695529e-19	3.1586981371613755e-21	6	2	5	0.21875000000000003	0.6875000000000002			Unknown
OG0001185	2	255	197	644	1.0050251256281406	71.63515016685206	0.025639494376430774	7.291027390149905e-23	4.891550276051572e-19	9.05842643713254e-21	5	1	4	0.375	0.375			Unknown
OG0000866	16	375	183	524	8.040201005025125	58.28698553948832	0.1221712204007286	1.2812462969298982e-22	8.595881406102687e-19	1.5628875283823067e-20	12	7	5	0.7744140625000003	0.7744140625000003		RNase H|Endonuclease-reverse transcriptase|Reverse transcriptase (RNA-dependent DNA polymerase)	Annotated Domain
OG0000826	35	491	164	408	17.587939698492463	45.383759733036705	0.17733843326213303	1.641038987678936e-22	1.100973056833798e-18	1.9354698122109502e-20	16	6	12	0.0768127	0.45449829101562506			Unknown
OG0001008	10	329	189	570	5.025125628140704	63.40378197997776	0.0916679	1.6443848456703556e-22	1.1032177929602415e-18	1.9354698122109502e-20	7	4	4	0.9999999999999998	0.9999999999999998	Afu1g00890|Afu1g01090	Protein of unknown function (DUF3435)	Reference-Containing Family
OG0000847	31	466	168	433	15.577889447236181	48.16462736373748	0.17145667279787452	2.999006001421585e-22	2.0120331263537415e-18	3.469022631644382e-20	10	5	6	0.7539062500000002	1			Unknown
OG0000969	16	370	183	529	8.040201005025125	58.843159065628484	0.12500369221680696	4.967137231519221e-22	3.3324523686262455e-18	5.648224353603806e-20	7	1	6	0.125	0.125			Unknown
OG0000973	16	369	183	530	8.040201005025125	58.954393770856505	0.12557939787048145	9.14019636658696e-22	6.132157742343191e-18	1.0220262903905318e-19	7	1	6	0.125	0.125			Unknown
OG0001211	2	244	197	655	1.0050251256281406	72.8587	0.027253058167595906	1.056414819714665e-21	7.087487025465688e-18	1.1618831189288013e-19	4	2	3	0.625	1			Unknown
OG0001029	12	337	187	562	6.030150753768844	62.5139	0.10701534457861915	1.151687988050063e-21	7.726674711827873e-18	1.2462378567464312e-19	9	4	5	1	1			Unknown
OG0001105	19	388	180	511	9.547738693467336	56.84093437152391	0.13901775486827034	1.445939537942106e-21	9.70080836005359e-18	1.5279939471273197e-19	11	8	4	0.22656250000000003	0.548828	Afu7g08240		Reference-Containing Family
OG0003116	1	230	198	669	0.5025125628140703	74.41601779755284	0.0146904	1.457618312954963e-21	9.779161261614846e-18	1.5279939471273197e-19	4	1	3	0.625	0.625	Afu1g01000	2OG-Fe(II) oxygenase superfamily	Reference-Containing Family
OG0003747	17	372	182	527	8.542713567839195	58.620689655172406	0.13232600732600733	1.649295228956832e-21	1.1065121691071386e-17	1.7023264140109824e-19	11	8	4	0.22656250000000003	0.548828	Afu7g08235		Reference-Containing Family
OG0000908	24	418	175	481	12.060301507537687	53.50389321468298	0.1578127136021873	1.696172981086773e-21	1.1379624530111162e-17	1.7241855348653275e-19	6	2	4	0.6875000000000002	0.6875000000000002			Unknown
OG0000982	16	365	183	534	8.040201005025125	59.399332591768626	0.12791376600044913	1.9219883580677383e-21	1.2894619894276456e-17	1.924570133474098e-19	7	1	6	0.125	0.125		alpha-L-rhamnosidase|alpha-L-rhamnosidase	Annotated Domain
OG0000838	89	714	110	185	44.72361809045226	20.57842046718576	0.2096384008148714	2.5500283865376686e-21	1.710814044528122e-17	2.5159030066590028e-19	11	4	9	0.0654297	0.548828	Afu3g02550	Protein of unknown function (DUF3435)	Reference-Containing Family
OG0002339	185	549	14	350	92.96482412060301	38.9321	8.424408014571949	2.9375040493975975e-21	1.9707714667408482e-17	2.8561905315084756e-19	6	5	1	0.21875000000000003	0.21875000000000003	Afu3g02450		Reference-Containing Family
OG0001131	2	239	197	660	1.0050251256281406	73.41490545050056	0.028035596712189113	3.787664058376726e-21	2.5411438167649453e-17	3.6302054525213504e-19	6	2	4	0.6875000000000002	0.6875000000000002		Phosphotransferase enzyme family	Annotated Domain
OG0001079	9	307	190	592	4.522613065326634	65.85094549499443	0.0913424	5.035762458829888e-21	3.378493033628972e-17	4.758440892435172e-19	14	5	10	0.17956542968750003	0.4239501953124999			Unknown
OG0000745	52	562	147	337	26.13065326633166	37.4861	0.21211901130558986	6.170192185041288e-21	4.1395819369442e-17	5.7494193568669445e-19	14	11	7	0.057373	1			Unknown
OG0000754	49	549	150	350	24.623115577889447	38.9321	0.2082574377656345	7.027607677556333e-21	4.714821990872544e-17	6.458660261469238e-19	14	10	9	0.17956542968750003	0.4239501953124999		Beta-ketoacyl synthase C-terminal domain|Acyl transferase domain|Beta-ketoacyl synthase N-terminal domain	Annotated Domain
OG0001113	7	283	192	616	3.5175879396984926	68.52057842046719	0.0793581	2.802609091557801e-20	1.880270439526129e-16	2.5409059993596335e-18	6	3	3	1	1			Unknown
OG0001134	7	277	192	622	3.5175879396984926	69.18798665183537	0.0818667	1.086538578888837e-19	7.289587325765206e-16	9.719449767686942e-18	9	2	7	0.17968750000000003	0.17968750000000003			Unknown
OG0001075	9	294	190	605	4.522613065326634	67.29699666295885	0.0974758	1.2755024952621292e-19	8.557346240713625e-16	1.1259666106202137e-17	6	3	3	1	1			Unknown
OG0003444	2	225	197	674	1.0050251256281406	74.9722	0.030411731528482797	1.5334464253377583e-19	1.028789206759102e-15	1.3360898789079248e-17	4	2	3	0.625	1	Afu1g00930		Reference-Containing Family
OG0001107	5	257	194	642	2.512562814070352	71.4127	0.0643828	2.121044663816216e-19	1.4230088649542993e-15	1.8243703396849992e-17	8	4	4	1	1			Unknown
OG0000870	31	442	168	457	15.577889447236181	50.834260289210235	0.19078592975651798	2.1670921439551479e-19	1.4539021193795087e-15	1.8403824295943148e-17	14	7	10	0.17956542968750003	1			Unknown
OG0001214	2	223	197	676	1.0050251256281406	75.19466073414905	0.0307755	2.851639022585646e-19	1.9131646202527097e-15	2.391455775315887e-17	9	2	7	0.17968750000000003	0.17968750000000003		RNase H	Annotated Domain
OG0001085	11	300	188	599	5.527638190954774	66.62958843159066	0.11682624113475178	1.5735651566360923e-18	1.0557048635871543e-14	1.3033393377619188e-16	12	4	9	0.14599609375000003	0.3876953125000001			Unknown
OG0000972	20	365	179	534	10.050251256281408	59.399332591768626	0.16346521772403766	1.8270641908442134e-18	1.2257773656373827e-14	1.4948504458992473e-16	11	5	7	0.548828	0.9999999999999997			Unknown
OG0001229	2	211	197	688	1.0050251256281406	76.52947719688544	0.0331032	6.006726197459473e-18	4.0299126058755606e-14	4.855316392621157e-16	6	2	5	0.21875000000000003	0.6875000000000002			Unknown
OG0001132	3	222	196	677	1.507537688442211	75.3059	0.046676778819635965	6.2803708862049236e-18	4.213500827554883e-14	5.016072413755813e-16	7	3	4	0.9999999999999998	0.9999999999999998		Ankyrin repeats (3 copies)|Ankyrin repeats (3 copies)|Ankyrin repeat|NACHT domain	Annotated Domain
OG0001326	1	194	198	705	0.5025125628140703	78.42046718576195	0.018353639487660105	1.4268172813175035e-17	9.572517140359132e-14	1.1261784871010744e-15	4	1	3	0.625	0.625			Unknown
OG0000998	16	327	183	572	8.040201005025125	63.62625139043382	0.15293862067813038	1.861278093474484e-17	1.2487314729120312e-13	1.452013340595385e-15	13	5	8	0.581055	0.581055	Afu7g08520		Reference-Containing Family
OG0000012	123	797	76	102	61.80904522613066	11.345939933259176	0.20712540447731626	2.5638777460679355e-17	1.720105579836978e-13	1.977132850387331e-15	15	8	7	0.9999999999999997	0.9999999999999997	Afu1g00790|Afu1g16070|Afu5g14980|Afu7g07060|Afu7g08310|Afu8g06220	Protein of unknown function (DUF3723)	Reference-Containing Family
OG0000699	171	497	28	402	85.92964824120602	44.71635150166852	4.9397815464213854	3.1178286427698114e-17	2.0917512364342663e-13	2.3769900414025754e-15	8	6	3	0.2890624999999999	0.7265625000000002			Unknown
OG0001129	9	271	190	628	4.522613065326634	69.85539488320356	0.10976888716255584	3.2292139657047214e-17	2.1664796495912976e-13	2.434246797293593e-15	10	5	5	1	1		Ankyrin repeats (3 copies)|Ankyrin repeats (3 copies)	Annotated Domain
OG0001200	92	154	107	745	46.231155778894475	82.8699	4.1594853744386455	5.975812482715114e-17	4.0091725946535697e-13	4.454636216281744e-15	14	7	11	0.057373	1			Unknown
OG0001180	4	218	195	681	2.0100502512562812	75.75083426028921	0.064079	1.9713663297830584e-16	1.322589670651454e-12	1.453395242474125e-14	7	2	5	0.4531249999999996	0.4531249999999996		Reverse transcriptase (RNA-dependent DNA polymerase)|Endonuclease-reverse transcriptase	Annotated Domain
OG0000426	165	885	34	14	82.91457286432161	1.557285873192436	0.0767697	2.4575044596276284e-16	1.648739741964176e-12	1.7921084151784523e-14	7	4	3	0.9999999999999998	0.9999999999999998	Afu3g02580	short chain dehydrogenase	Reference-Containing Family
OG0000880	34	428	165	471	17.08542713567839	52.39154616240267	0.22676295666949872	2.84583912632388e-16	1.909273469850691e-12	2.0529822256459042e-14	12	7	8	0.3876953125000001	0.7744140625000003		Protein of unknown function (DUF3431)	Annotated Domain
OG0006267	186	606	13	293	93.46733668341709	32.59176863181313	6.917745620715918	3.1294544360532234e-16	2.0995509811481076e-12	2.2335648735618165e-14	5	4	2	0.375	1	Afu4g11370		Reference-Containing Family
OG0001053	110	222	89	677	55.27638190954774	75.3059	3.769106184836522	3.880476063235831e-16	2.6034113908249192e-12	2.740433042973599e-14	13	8	8	0.581055	0.581055			Unknown
OG0001003	20	340	179	559	10.050251256281408	62.18020022246941	0.1837002957607624	5.046137349552922e-16	3.3854535478150556e-12	3.52651411230735e-14	12	7	7	0.7744140625000003	0.7744140625000003			Unknown
OG0001358	75	108	124	791	37.68844221105528	87.98665183537263	4.429883512544803	6.979253831546242e-16	4.682381395584374e-12	4.8271973150354374e-14	11	7	7	0.548828	0.548828			Unknown
OG0001372	1	177	198	722	0.5025125628140703	80.31145717463849	0.020601495177766365	8.293134982529151e-16	5.563864259778807e-12	5.677412509978375e-14	6	1	5	0.21875000000000003	0.21875000000000003			Unknown
OG0002268	26	5	173	894	13.06532663316583	99.44382647385984	26.871676300578034	9.23331544575109e-16	6.194631332554406e-12	6.257203366216572e-14	11	7	4	0.548828	0.548828			Unknown
OG0000942	40	452	159	447	20.100502512562816	49.72191323692992	0.24878944732008682	1.9356544478778697e-15	1.2986305690812628e-11	1.2986305690812627e-13	13	7	6	0.9999999999999999	0.9999999999999999	Afu1g00550|Afu1g00910		Reference-Containing Family
OG0000748	159	448	40	451	79.89949748743719	50.16685205784205	4.001618303571429	2.0320487580971142e-15	1.3633015118073539e-11	1.349803477036984e-13	11	7	4	0.548828	0.548828			Unknown
OG0002980	199	742	0	157	100	17.46384872080089	inf	2.20352733542677e-15	1.47834648933782e-11	1.4493593032723725e-13	3	3	0	0.25	0.25	Afu3g09120		Reference-Containing Family
OG0001652	49	45	150	854	24.623115577889447	94.9944	6.199407407407407	3.0457892797472173e-15	2.043420027782408e-11	1.983902939594571e-13	10	5	7	0.3437499999999999	1			Unknown
OG0000753	134	330	65	569	67.33668341708542	63.29254727474972	3.5545920745920747	4.624147163075725e-15	3.102340331707504e-11	2.9830195497187536e-13	15	11	5	0.11846923828124997	0.30175781250000017			Unknown
OG0001288	2	180	197	719	1.0050251256281406	79.97775305895439	0.0405527	6.291824539937777e-15	4.2211850838442545e-11	4.0201762703278614e-13	4	1	3	0.625	0.625			Unknown
OG0001222	3	191	196	708	1.507537688442211	78.75417130144605	0.0567368	6.8484712722534936e-15	4.594639376554869e-11	4.334565449580065e-13	6	3	4	0.6875000000000002	1			Unknown
OG0001965	33	16	166	883	16.582914572864322	98.2202	10.971009036144578	7.77179402738772e-15	5.214096612974422e-11	4.872987488761142e-13	10	5	6	0.7539062500000002	1			Unknown
OG0001400	1	168	198	731	0.5025125628140703	81.31256952169078	0.021975709475709475	8.293100505758217e-15	5.563841129313187e-11	5.151704749364062e-13	5	0	5	0.0625	0.0625			Unknown
OG0001065	17	306	182	593	8.542713567839195	65.96218020022246	0.181013	1.0125854684287925e-14	6.793435907688769e-11	6.232510007053917e-13	9	1	8	0.0390625	0.0390625			Unknown
OG0001183	91	166	108	733	45.7286	81.53503893214683	3.7206046407853637	1.1244925370450374e-14	7.544220431035157e-11	6.858382210031961e-13	14	11	5	0.057373	0.4239501953124999			Unknown
OG0000580	93	679	106	220	46.733668341708544	24.47163515016685	0.2842693194764776	1.1539846496610591e-14	7.742083014576046e-11	6.974849562681123e-13	16	10	11	0.21011352539062492	0.45449829101562506			Unknown
OG0000583	189	648	10	251	94.9749	27.919911012235815	7.320833333333334	1.9074257668363157e-14	1.2796919469704841e-10	1.1425820955093608e-12	12	9	3	0.14599609375000003	0.14599609375000003			Unknown
OG0002991	197	722	2	177	98.99497487437185	19.688542825361512	24.147506925207757	1.9387563741593603e-14	1.300711651423515e-10	1.151072257896916e-12	7	6	2	0.125	0.4531249999999996	Afu6g00193		Reference-Containing Family
OG0001274	79	132	120	767	39.698492462311556	85.31701890989989	3.8253156565656568	5.4062717626767983e-14	3.627067725579864e-10	3.1816383557718107e-12	13	8	6	0.581055	0.9999999999999999			Unknown
OG0000666	148	407	51	492	74.37185929648241	54.727474972191324	3.5080213903743314	7.098839716710843e-14	4.762611565941304e-10	4.1414013616880904e-12	15	11	6	0.11846923828124997	0.6072387695312501			Unknown
OG0001378	1	154	198	745	0.5025125628140703	82.8699	0.024432638069001707	1.3122574598032965e-13	8.803935297820316e-10	7.589599394672687e-12	6	1	5	0.21875000000000003	0.21875000000000003			Unknown
OG0000889	38	418	161	481	19.09547738693467	53.50389321468298	0.2715979672501412	2.1456195522607148e-13	1.4394961576117136e-09	1.2303385962493279e-11	13	7	7	0.9999999999999999	0.9999999999999999			Unknown
OG0000857	131	337	68	562	65.82914572864321	62.5139	3.2126898237039625	4.458871921076002e-13	2.9914571718498897e-09	2.5351331964829574e-11	13	10	3	0.0922852	0.0922852			Unknown
OG0001960	177	578	22	321	88.94472361809045	35.7063	4.468150361748978	4.723561523269961e-13	3.1690374259618167e-09	2.663056660472115e-11	14	9	7	0.4239501953124999	1	Afu2g09420	F-box-like	Reference-Containing Family
OG0001715	42	39	157	860	21.105527638190953	95.66184649610679	5.89907	5.872567357214535e-13	3.939905439955232e-09	3.283254533296027e-11	12	8	5	0.3876953125000001	0.7744140625000003			Unknown
OG0006217	20	306	179	593	10.050251256281408	65.96218020022246	0.21652608902033812	7.580031200474718e-13	5.085442932398488e-09	4.202845398676436e-11	11	5	7	0.548828	0.9999999999999997	Afu4g07450		Reference-Containing Family
OG0001499	0	131	199	768	0	85.42825361512793	0	9.544177080969042e-13	6.4031884036221304e-09	5.248515084936172e-11	5	0	5	0.0625	0.0625			Unknown
OG0000511	196	732	3	167	98.49246231155779	18.5762	14.90528233151184	1.5790265207100951e-12	1.0593688927444028e-08	8.612755225564251e-11	5	3	2	1	1	Afu3g06970	S4 domain|Ribosomal protein S4/S9 N-terminal domain	Reference-Containing Family
OG0000828	50	470	149	429	25.125628140703515	47.71968854282536	0.30629730115664716	1.616279996316632e-12	1.0843622495288285e-08	8.744856851038939e-11	14	9	5	0.4239501953124999	0.4239501953124999			Unknown
OG0001459	1	143	198	756	0.5025125628140703	84.09343715239154	0.0267006	1.8835602594328283e-12	1.2636805780534846e-08	1.0109444624427877e-10	7	1	6	0.125	0.125			Unknown
OG0000921	7	204	192	695	3.5175879396984926	77.30812013348165	0.12420853758169935	1.9340736466825002e-12	1.2975700095592894e-08	1.0298174679041979e-10	9	4	5	1	1			Unknown
OG0001141	15	264	184	635	7.537688442211055	70.63403781979977	0.1960844861660079	3.1392987835462777e-12	2.106155553881198e-08	1.658390199906455e-10	12	5	8	0.3876953125000001	0.7744140625000003			Unknown
OG0003925	152	845	47	54	76.38190954773869	6.0066740823136815	0.2066725418607579	3.3994225839117494e-12	2.2806726115463927e-08	1.7817754777706193e-10	8	6	2	0.2890624999999999	0.2890624999999999	Afu2g17305		Reference-Containing Family
OG0001346	5	183	194	716	2.512562814070352	79.64404894327029	0.10083938933017858	3.55997285531337e-12	2.38838578862974e-08	1.8514618516509612e-10	10	4	6	0.7539062500000002	0.7539062500000002			Unknown
OG0000814	186	649	13	250	93.46733668341709	27.808676307007786	5.5114377148275455	3.693021047856744e-12	2.4776478210070897e-08	1.8913342145092288e-10	8	4	4	1	1	Afu3g03750		Reference-Containing Family
OG0001170	13	250	186	649	6.532663316582915	72.19132369299221	0.18144086021505376	3.693021047856744e-12	2.4776478210070897e-08	1.8913342145092288e-10	10	5	5	1	1		AAA domain	Annotated Domain
OG0004035	2	152	197	747	1.0050251256281406	83.09232480533927	0.0498931	4.215830810876559e-12	2.8284008910170836e-08	2.1427279477402149e-10	6	2	4	0.6875000000000002	0.6875000000000002	Afu7g08400	Ankyrin repeats (3 copies)|Ankyrin repeat|Ankyrin repeat	Reference-Containing Family
OG0001049	19	290	180	609	9.547738693467336	67.74193548387096	0.22166666666666668	4.538144651816658e-12	3.0446412469037956e-08	2.2892039450404479e-10	6	3	3	1	1		Reverse transcriptase (RNA-dependent DNA polymerase)|Chromo (CHRromatin Organisation MOdifier) domain	Annotated Domain
OG0001599	199	775	0	124	100	13.793103448275861	inf	4.768261886295613e-12	3.199026899515727e-08	2.3873335071012886e-10	3	3	0	0.25	0.25	Afu3g07400		Reference-Containing Family
OG0000451	97	669	102	230	48.743718592964825	25.583982202447164	0.3269439315337495	6.9347702374423705e-12	4.652537352300086e-08	3.4463239646667306e-10	16	9	12	0.0768127	0.8036193847656252		Fungal Zn(2)-Cys(6) binuclear cluster domain	Annotated Domain
OG0001317	42	421	157	478	21.105527638190953	53.17018909899889	0.30373541915669394	8.604356400351951e-12	5.772662708996124e-08	4.244604933085385e-10	14	7	7	1	1	Afu7g08231		Reference-Containing Family
OG0000789	15	259	184	640	7.537688442211055	71.19021134593993	0.20144367970454927	8.699676707514141e-12	5.8366131030712376e-08	4.2603015350884947e-10	9	3	6	0.507812	0.507812			Unknown
OG0000053	130	780	69	119	65.32663316582915	13.236929922135706	0.28743961352657005	1.461040683061764e-11	9.802121942661374e-08	7.10298691497201e-10	12	7	9	0.14599609375000003	0.7744140625000003			Unknown
OG0001299	7	195	192	704	3.5175879396984926	78.30923248053394	0.13162393162393163	1.4728910848181208e-11	9.881626288044772e-08	7.109083660463865e-10	6	3	5	0.21875000000000003	1			Unknown
OG0006672	186	658	13	241	93.46733668341709	26.807563959955505	5.240355389291559	1.7539226802599752e-11	1.1767067261864173e-07	8.405048044188695e-10	5	4	2	0.375	1	Afu8g02250		Reference-Containing Family
OG0000903	40	405	159	494	20.100502512562816	54.94994438264739	0.3068561223697492	2.1585312962498383e-11	1.4481586466540166e-07	1.0270628699673877e-09	12	8	7	0.3876953125000001	0.7744140625000003			Unknown
OG0000038	89	631	110	268	44.72361809045226	29.810901001112345	0.3436392450655525	2.422067446024754e-11	1.6249650495380077e-07	1.1443415841816956e-09	13	7	7	0.9999999999999999	0.9999999999999999	Afu5g15090|Afu5g15130		Reference-Containing Family
OG0000061	77	581	122	318	38.69346733668342	35.37263626251391	0.3454473632233853	3.088857563494096e-11	2.0723145393481887e-07	1.449171006537195e-09	14	9	6	0.4239501953124999	0.7905273437500004	Afu1g16060|Afu5g14960|Afu5g14970		Reference-Containing Family
OG0001289	9	205	190	694	4.522613065326634	77.19688542825361	0.1603594351732991	5.0657036673342975e-11	3.39858059041458e-07	2.360125410010125e-09	7	2	5	0.4531249999999996	0.4531249999999996			Unknown
OG0003072	76	573	123	326	38.19095477386934	36.26251390433816	0.35153733736290244	6.34555133800298e-11	4.257230392666199e-07	2.9360209604594476e-09	14	6	11	0.057373	0.7905273437500004	Afu7g06960	FAD binding domain	Reference-Containing Family
OG0000747	150	452	49	447	75.37688442211056	49.72191323692992	3.027361387032689	6.481102616892258e-11	4.348171745673016e-07	2.9781998258034354e-09	11	7	5	0.548828	0.9999999999999997			Unknown
OG0003746	76	572	123	327	38.19095477386934	36.373748609566185	0.3532321337199386	6.793489444037715e-11	4.5577520680049034e-07	3.1005116108876893e-09	14	6	11	0.057373	0.7905273437500004	Afu7g06940	Fungal specific transcription factor domain	Reference-Containing Family
OG0001098	20	282	179	617	10.050251256281408	68.63181312569522	0.2444629343476366	7.589957014534798e-11	5.092102161051396e-07	3.44060956827797e-09	10	4	7	0.3437499999999999	0.7539062500000002		Glycosyl hydrolase family 10	Annotated Domain
OG0001092	94	210	105	689	47.23618090452261	76.64071190211345	2.937233560090703	7.862058264637972e-11	5.274654889745616e-07	3.540036838755447e-09	14	10	7	0.17956542968750003	1			Unknown
OG0001030	20	281	179	618	10.050251256281408	68.74304783092325	0.24573053142209586	7.936282949679566e-11	5.324452230940021e-07	3.549634820626681e-09	9	4	5	1	1		Reverse transcriptase (RNA-dependent DNA polymerase)	Annotated Domain
OG0000756	149	450	50	449	74.87437185929649	49.94438264738598	2.973377777777778	1.1400240489030366e-10	7.648421344090473e-07	5.065179698073161e-09	11	7	4	0.548828	0.548828		GMC oxidoreductase|GMC oxidoreductase	Annotated Domain
OG0001582	0	111	199	788	0	87.65294771968854	0	1.15803836998512e-10	7.76927942423017e-07	5.1113680422566904e-09	3	0	3	0.25	0.25			Unknown
OG0000781	64	515	135	384	32.1608	42.714126807563964	0.3534843581445523	1.3265181914559128e-10	8.89961054647772e-07	5.816738919266484e-09	15	9	11	0.11846923828124997	0.6072387695312501			Unknown
OG0001006	29	334	170	565	14.572864321608039	62.8476	0.2885699189855583	1.4250763838670621e-10	9.56083745936412e-07	6.208336012574104e-09	14	6	9	0.4239501953124999	0.7905273437500004			Unknown
OG0001591	0	109	199	790	0	87.87541713014461	0	2.0031355898367088e-10	1.343903667221448e-06	8.670346240138374e-09	3	0	3	0.25	0.25			Unknown
OG0000931	116	303	83	596	58.291457286432156	66.29588431590656	2.749055628454412	2.0775040442449116e-10	1.3937974632839112e-06	8.910147372604611e-09	15	12	7	0.035156250000000014	0.9999999999999997		Alcohol dehydrogenase GroES-like domain	Annotated Domain
OG0000704	156	490	43	409	78.39195979899498	45.49499443826474	3.0281917418130044	2.0850993255312624e-10	1.3988931374989238e-06	8.910147372604611e-09	13	9	7	0.26684570312499983	0.9999999999999999			Unknown
OG0001251	11	215	188	684	5.527638190954774	76.0845	0.18614547253834735	2.279025899881791e-10	1.5289984762306935e-06	9.644121212906545e-09	7	3	5	0.4531249999999996	0.9999999999999998			Unknown
OG0000815	57	480	142	419	28.643216080402013	46.60734149054505	0.35039612676056336	2.285609290284902e-10	1.5334152728521407e-06	9.644121212906545e-09	14	9	8	0.4239501953124999	0.7905273437500004		Fungal rhodopsin domain|Fungal rhodopsin domain	Annotated Domain
OG0000709	32	349	167	550	16.08040201005025	61.179087875417125	0.30197484686786885	2.356701515351214e-10	1.5811110466491295e-06	9.881944041557058e-09	9	6	5	0.507812	1		RNase H-like domain found in reverse transcriptase|Chromo (CHRromatin Organisation MOdifier) domain|Integrase zinc binding domain	Annotated Domain
OG0003462	162	523	37	376	81.407	41.824249165739715	3.1477443026200196	2.902360802771012e-10	1.947193862579072e-06	1.2019715201105383e-08	13	8	9	0.26684570312499983	0.581055	Afu2g00960	NACHT domain	Reference-Containing Family
OG0003645	162	523	37	376	81.407	41.824249165739715	3.1477443026200196	2.902360802771012e-10	1.947193862579072e-06	1.2019715201105383e-08	13	8	9	0.26684570312499983	0.581055	Afu2g00963	Ankyrin repeat	Reference-Containing Family
OG0000759	148	451	51	448	74.37185929648241	49.83314794215795	2.882657275770619	3.3156593594941383e-10	2.224475864284617e-06	1.3647091191930167e-08	16	11	8	0.21011352539062492	1		NFACT protein RNA binding domain	Annotated Domain
OG0002014	27	19	172	880	13.5678	97.8865	7.270501835985312	3.400721192876267e-10	2.2815438483006877e-06	1.391185273354078e-08	5	3	2	1	1			Unknown
OG0000728	75	560	124	339	37.68844221105528	37.708565072302555	0.3661434331797235	3.859222753241895e-10	2.5891525451499873e-06	1.569183360696962e-08	14	7	9	0.4239501953124999	1			Unknown
OG0000577	118	728	81	171	59.2965	19.021134593993324	0.3421855921855922	3.9911860706951077e-10	2.677686734829348e-06	1.6130642980899688e-08	15	7	13	0.00738525	0.9999999999999997			Unknown
OG0000601	179	626	20	273	89.9497	30.367074527252502	3.903115015974441	5.243911347754259e-10	3.5181401232083326e-06	2.1066707324600795e-08	6	4	2	0.6875000000000002	0.6875000000000002			Unknown
OG0001320	66	122	133	777	33.165829145728644	86.4294	3.160483175150992	6.139574711300903e-10	4.119040673811776e-06	2.451809924887962e-08	14	8	7	0.7905273437500004	1		Protein of unknown function (DUF3723)	Annotated Domain
OG0001462	3	138	196	761	1.507537688442211	84.6496	0.0844055	7.696479980315127e-10	5.163568418793419e-06	3.0553659282801296e-08	9	2	7	0.17968750000000003	0.17968750000000003			Unknown
OG0002491	18	6	181	893	9.045226130653267	99.33259176863181	14.80110497237569	1.1048728624802993e-09	7.412592034380328e-06	4.36034825551784e-08	9	5	4	1	1			Unknown
OG0000518	193	733	6	166	96.98492462311557	18.46496106785317	7.284674852205548	1.1200882109609077e-09	7.51467180733673e-06	4.3945449165711866e-08	6	4	2	0.6875000000000002	0.6875000000000002			Unknown
OG0001513	2	125	197	774	1.0050251256281406	86.09566184649611	0.0628629	1.241841467935485e-09	8.33151440837917e-06	4.843903725801843e-08	7	2	5	0.4531249999999996	0.4531249999999996			Unknown
OG0001409	5	155	194	744	2.512562814070352	82.75862068965517	0.12371134020618557	1.4613006053882277e-09	9.80386576154962e-06	5.666974428641399e-08	8	3	5	0.7265625000000002	0.7265625000000002			Unknown

## Sheet: ITZ
Orthogroup	Number_pos_present_in	Number_neg_present_in	Number_pos_not_present_in	Number_neg_not_present_in	Sensitivity	Specificity	Odds_ratio	Naive_p	Bonferroni_p	Benjamini_H_p	Af293 Reference	Pfam Domain(s)	Annotation Class
OG0004755	24	138	134	23	15.1899	14.2857	0.0298507	1.65E-39	6.19E-36	6.19E-36	Afu1g16900	Fungal specific transcription factor domain	Reference-Containing Family
OG0003357	30	131	128	30	18.9873	18.6335	0.0536737	1.67E-30	6.29E-27	3.15E-27	Afu3g00100	Endoribonuclease L-PSP|Flavin containing amine oxidoreductase	Reference-Containing Family
OG0002375	146	57	12	104	92.4051	64.5963	22.1988	2.20E-28	8.28E-25	2.76E-25	Afu1g17500	Trichodiene synthase (TRI5)	Reference-Containing Family
OG0000915	125	31	33	130	79.1139	80.7453	15.8847	4.77E-28	1.79E-24	4.48E-25			Unknown
OG0000908	123	32	35	129	77.8481	80.1242	14.167	2.69E-26	1.01E-22	2.02E-23			Unknown
OG0000956	115	26	43	135	72.7848	83.8509	13.8864	1.62E-25	6.08E-22	1.01E-22		Fungal WD-like	Annotated Domain
OG0000550	126	37	32	124	79.7468	77.0186	13.1959	3.48E-25	1.31E-21	1.87E-22			Annotated Domain
OG0001975	10	88	148	73	6.32911	45.3416	0.0560504	1.55E-22	5.81E-19	7.26E-20	Afu1g03310		Reference-Containing Family
OG0001049	89	12	69	149	56.3291	92.5466	16.0157	3.12E-22	1.17E-18	1.30E-19		Reverse transcriptase (RNA-dependent DNA polymerase)|Chromo (CHRromatin Organisation MOdifier) domain	Annotated Domain
OG0000706	129	47	29	114	81.6456	70.8075	10.7894	9.14E-22	3.43E-18	3.43E-19	Afu1g16050|Afu5g14950		Reference-Containing Family
OG0000756	132	53	26	108	83.5443	67.0807	10.3454	1.22E-20	4.60E-17	4.18E-18		GMC oxidoreductase|GMC oxidoreductase	Annotated Domain
OG0000992	103	25	55	136	65.1899	84.472	10.1876	2.66E-20	1.00E-16	8.34E-18			Unknown
OG0002498	143	70	15	91	90.5063	56.5217	12.3933	3.62E-20	1.36E-16	1.05E-17	Afu5g15060		Reference-Containing Family
OG0000747	131	53	27	108	82.9114	67.0807	9.88679	4.35E-20	1.63E-16	1.17E-17			Unknown
OG0001532	66	144	92	17	41.7722	10.559	0.084692	4.84E-20	1.82E-16	1.21E-17	Afu3g07730		Reference-Containing Family
OG0000748	130	53	28	108	82.2785	67.0807	9.46092	1.50E-19	5.64E-16	3.34E-17			Unknown
OG0006217	8	77	150	84	5.06329	52.1739	0.0581818	1.51E-19	5.67E-16	3.34E-17	Afu4g07450		Reference-Containing Family
OG0000990	108	31	50	130	68.3544	80.7453	9.05806	2.57E-19	9.67E-16	5.37E-17			Unknown
OG0001185	74	8	84	153	46.8354	95.0311	16.8482	4.82E-19	1.81E-15	9.54E-17			Annotated Domain
OG0001756	6	71	152	90	3.79747	55.9006	0.0500371	7.70E-19	2.89E-15	1.45E-16	Afu4g06430		Reference-Containing Family
OG0000668	53	131	105	30	33.5443	18.6335	0.115594	1.64E-18	6.16E-15	2.93E-16			Unknown
OG0001099	85	15	73	146	53.7975	90.6832	11.3333	1.94E-18	7.28E-15	3.31E-16			Unknown
OG0001204	148	83	10	78	93.6709	48.4472	13.9084	2.13E-18	8.01E-15	3.48E-16	Afu5g14860|Afu5g15050	Cytochrome P450	Reference-Containing Family
OG0001113	84	15	74	146	53.1646	90.6832	11.0486	4.88E-18	1.83E-14	7.64E-16			Unknown
OG0001525	53	129	105	32	33.5443	19.8758	0.125212	1.60E-17	6.03E-14	2.16E-15	Afu1g13650		Reference-Containing Family
OG0000969	99	27	59	134	62.6582	83.2298	8.32768	1.61E-17	6.04E-14	2.16E-15			Annotated Domain
OG0000973	99	27	59	134	62.6582	83.2298	8.32768	1.61E-17	6.04E-14	2.16E-15			Unknown
OG0000982	99	27	59	134	62.6582	83.2298	8.32768	1.61E-17	6.04E-14	2.16E-15		alpha-L-rhamnosidase|alpha-L-rhamnosidase	Annotated Domain
OG0000862	113	42	45	119	71.519	73.913	7.11481	2.48E-16	9.33E-13	3.22E-14			Unknown
OG0000824	122	52	36	109	77.2152	67.7019	7.10363	4.50E-16	1.69E-12	5.64E-14			Annotated Domain
OG0002339	64	135	94	26	40.5063	16.1491	0.131127	4.93E-16	1.85E-12	5.97E-14	Afu3g02450		Reference-Containing Family
OG0002980	96	155	62	6	60.7595	3.72671	0.0599376	5.22E-16	1.96E-12	6.13E-14	Afu3g09120		Reference-Containing Family
OG0000758	109	39	49	122	68.9873	75.7764	6.95866	5.74E-16	2.16E-12	6.54E-14		Ankyrin repeats (3 copies)|Ankyrin repeats (3 copies)|Ankyrin repeats (3 copies)|Ankyrin repeats (3 copies)	Annotated Domain
OG0001138	71	11	87	150	44.9367	93.1677	11.1285	1.16E-15	4.35E-12	1.28E-13			Unknown
OG0001211	67	9	91	152	42.4051	94.4099	12.4347	1.45E-15	5.43E-12	1.55E-13			Unknown
OG0000848	113	44	45	117	71.519	72.6708	6.67727	1.74E-15	6.54E-12	1.80E-13		HNH endonuclease	Annotated Domain
OG0002638	76	143	82	18	48.1013	11.1801	0.116664	1.82E-15	6.83E-12	1.80E-13	Afu6g14620	Alpha-L-arabinofuranosidase B (ABFB) domain|Alpha-L-arabinofuranosidase B catalytic	Reference-Containing Family
OG0002780	76	143	82	18	48.1013	11.1801	0.116664	1.82E-15	6.83E-12	1.80E-13	Afu6g14630		Reference-Containing Family
OG0001160	69	11	89	150	43.6709	93.1677	10.572	6.29E-15	2.36E-11	6.06E-13			Annotated Domain
OG0000903	102	37	56	124	64.557	77.0186	6.10425	4.37E-14	1.64E-10	4.11E-12			Unknown
OG0000334	131	69	27	92	82.9114	57.1429	6.46914	1.05E-13	3.96E-10	9.65E-12			Annotated Domain
OG0000729	29	93	129	68	18.3544	42.236	0.164374	3.63E-13	1.36E-09	3.24E-11		Phosphotransferase enzyme family|Fungal protein kinase|Fungal protein kinase|Protein of unknown function (DUF3435)	Annotated Domain
OG0001081	71	16	87	145	44.9367	90.0621	7.39583	1.13E-12	4.24E-09	9.87E-11	Afu3g04100|Afu3g04270		Reference-Containing Family
OG0000905	17	74	141	87	10.7595	54.0373	0.141748	1.27E-12	4.76E-09	1.08E-10			Annotated Domain
OG0001200	7	56	151	105	4.43038	65.2174	0.0869205	1.55E-12	5.83E-09	1.29E-10			Annotated Domain
OG0001299	58	9	100	152	36.7089	94.4099	9.79556	2.25E-12	8.46E-09	1.84E-10			Unknown
OG0000601	80	139	78	22	50.6329	13.6646	0.162332	5.03E-12	1.89E-08	3.94E-10			Unknown
OG0000605	80	139	78	22	50.6329	13.6646	0.162332	5.03E-12	1.89E-08	3.94E-10			Annotated Domain
OG0000745	124	66	34	95	78.481	59.0062	5.24955	8.73E-12	3.28E-08	6.70E-10			Unknown
OG0001087	80	24	78	137	50.6329	85.0932	5.8547	9.04E-12	3.40E-08	6.79E-10		Ankyrin repeats (3 copies)	Annotated Domain
OG0000847	106	47	52	114	67.0886	70.8075	4.94435	1.10E-11	4.13E-08	8.10E-10			Unknown
OG0001134	74	20	84	141	46.8354	87.5776	6.21071	1.17E-11	4.40E-08	8.41E-10			Annotated Domain
OG0001960	137	84	21	77	86.7089	47.8261	5.98016	1.19E-11	4.46E-08	8.41E-10	Afu2g09420	F-box-like	Reference-Containing Family
OG0001549	3	44	155	117	1.89873	72.6708	0.0514663	1.31E-11	4.94E-08	9.14E-10			Annotated Domain
OG0003259	8	55	150	106	5.06329	65.8385	0.102788	1.59E-11	5.97E-08	1.09E-09	Afu6g11640	Fungal specific transcription factor domain|Fungal Zn(2)-Cys(6) binuclear cluster domain	Reference-Containing Family
OG0002264	129	73	29	88	81.6456	54.6584	5.36231	1.72E-11	6.48E-08	1.16E-09	Afu3g15190	Molydopterin dinucleotide binding domain|Molybdopterin oxidoreductase	Reference-Containing Family
OG0001627	42	3	116	158	26.5823	98.1366	19.069	2.08E-11	7.83E-08	1.37E-09		RNase H-like domain found in reverse transcriptase|Reverse transcriptase (RNA-dependent DNA polymerase)|Integrase zinc binding domain|Integrase core domain	Annotated Domain
OG0003146	126	71	32	90	79.7468	55.9006	4.9912	6.06E-11	2.28E-07	3.93E-09	Afu3g15170	Probable molybdopterin binding domain|MoeA C-terminal region (domain IV)|MoeA N-terminal region (domain I and II)	Reference-Containing Family
OG0000699	62	121	96	40	39.2405	24.8447	0.213499	7.56E-11	2.84E-07	4.81E-09			Annotated Domain
OG0000728	132	80	26	81	83.5443	50.3106	5.14038	9.77E-11	3.67E-07	6.12E-09			Annotated Domain
OG0000617	83	138	75	23	52.5316	14.2857	0.184444	1.26E-10	4.75E-07	7.79E-09		GAG-pre-integrase domain|Reverse transcriptase (RNA-dependent DNA polymerase)	Annotated Domain
OG0006672	95	146	63	15	60.1266	9.31677	0.154925	1.35E-10	5.07E-07	8.17E-09	Afu8g02250		Reference-Containing Family
OG0000737	125	71	33	90	79.1139	55.9006	4.80154	1.45E-10	5.45E-07	8.64E-09			Unknown
OG0001078	13	61	145	100	8.22785	62.1118	0.146976	1.55E-10	5.82E-07	9.10E-09		RNase H	Annotated Domain
OG0001504	2	38	156	123	1.26582	76.3975	0.041498	1.66E-10	6.25E-07	9.62E-09			Unknown
OG0001201	5	45	153	116	3.16456	72.0497	0.0842411	2.50E-10	9.39E-07	1.42E-08			Unknown
OG0001349	6	47	152	114	3.79747	70.8075	0.0957447	2.88E-10	1.08E-06	1.61E-08			Unknown
OG0001052	87	34	71	127	55.0633	78.882	4.57705	3.39E-10	1.27E-06	1.87E-08			Annotated Domain
OG0001326	60	14	98	147	37.9747	91.3043	6.42857	3.60E-10	1.35E-06	1.96E-08			Annotated Domain
OG0001354	43	5	115	156	27.2152	96.8944	11.6661	3.93E-10	1.48E-06	2.11E-08		Bacteriophage replication gene A protein (GPA)	Annotated Domain
OG0001372	51	9	107	152	32.2785	94.4099	8.04984	4.36E-10	1.64E-06	2.31E-08			Unknown
OG0001056	84	32	74	129	53.1646	80.1242	4.57601	5.09E-10	1.91E-06	2.66E-08			Unknown
OG0001030	68	20	90	141	43.038	87.5776	5.32667	8.52E-10	3.20E-06	4.38E-08		Reverse transcriptase (RNA-dependent DNA polymerase)	Annotated Domain
OG0001212	57	13	101	148	36.0759	91.9255	6.42498	9.29E-10	3.49E-06	4.67E-08		Reverse transcriptase (RNA-dependent DNA polymerase)|GAG-pre-integrase domain	Annotated Domain
OG0001325	44	6	114	155	27.8481	96.2733	9.97076	9.35E-10	3.51E-06	4.67E-08		Microvirus H protein (pilot protein)	Annotated Domain
OG0000710	24	75	134	86	15.1899	53.4161	0.205373	9.44E-10	3.55E-06	4.67E-08		AMP-binding enzyme|Helicase conserved C-terminal domain|SNF2-related domain|Phosphopantetheine attachment site|Condensation domain	Annotated Domain
OG0000744	117	65	41	96	74.0506	59.6273	4.21463	1.41E-09	5.30E-06	6.89E-08			Annotated Domain
OG0001075	70	22	88	139	44.3038	86.3354	5.02583	1.53E-09	5.75E-06	7.37E-08			Annotated Domain
OG0000505	154	121	4	40	97.4684	24.8447	12.7273	1.83E-09	6.88E-06	8.72E-08			Annotated Domain
OG0000590	93	142	65	19	58.8608	11.8012	0.191441	2.41E-09	9.07E-06	1.12E-07			Unknown
OG0000535	149	111	9	50	94.3038	31.0559	7.45746	2.42E-09	9.09E-06	1.12E-07	Afu5g12130	Ras family	Reference-Containing Family
