# Supplementary material for: Recent European origin of azole resistance in the critical priority fungal pathogen Aspergillus fumigatus
Source: Research Square preprint supplement (doi:10.21203/rs.3.rs-7905776/v1), 2025-11-13
Supplement: Supplementary file 3 [file d62b1af1e28b2b4c65ab5d0a.docx]

**Supplementary Information**

Supplementary figures

**Supplementary Figure 1: Four *A. fumigatus* isolates crossed in duplicate with *A. neoellipticus*** **to determine separate species.** Image at the bottom shows a successful cross for contrast.

**Supplementary Figure 2: No evidence of bias of tandem repeats in clusters associated with azole resistant.** a) average number of repeat copies per cluster b) average repeat unit size by cluster c) average repeat length per cluster.

**Supplementary Figure 3: Comparison of sexual fertility (based on number of cleistothecia produced) between crosses involving supermater strains and either azole sensitive (WT *cyp51A*) or azole-resistant (*cyp51A* TR34 or TR46) isolates from clusters 1-5 of *A. fumigatus* Representative cluster 1-5 isolates were crossed with supermater strains (E81, E83, E113, E121) as indicated on the x-axis. Data shows number of cleistothecia formed on oatmeal agar medium in 9-cm diameter Petri dishes. Dots show individual data points (average of triplicate crosses). There was no significant differences in fertility between the various cluster representatives according to a Kruskal-Wallis H-test (p>0.05).**

**Supplementary Figure 4: Progeny of crosses between azole-resistant and azole-susceptible *A. fumigatus* isolates show inheritance of genetic mechanism conferring resistance.** a) Measuring genetic recombination using the LD50 statistic for both sets of crosses. Maximum-likelihood phylogenies of parents and progeny isolates b) cross between azole-susceptible isolates and c) cross between azole-resistant isolate containing TR34/L98H and azole-susceptible isolate. Scale bar represents the average number of nucleotide

**Supplementary Figure 5:** Movie showing spread of TR34/L98H polymorphism from its origin in Western Europe around the globe.

Supplementary tables

**Supplementary Table 1:** *K*-values from cross-validation for assessing best fit for the data in ADMIXTURE

|  | Number of clusters | | | | | |
| --- | --- | --- | --- | --- | --- | --- |
|  | 1 | 2 | 3 | 4 | 5 | 6 |
| *K* | 0.21514 | 0.18311 | 0.17248 | 0.16115 | 0.14732 | 0.15413 |

**Supplementary Table 2:** Genetic clusters defined by multivariate methods and associated proportions of polymorphisms conferring antifungal resistance.

|  | Cluster | | | | |
| --- | --- | --- | --- | --- | --- |
| Gene & polymorphism | 1 | 2 | 3 | 4 | 5 |
| *msh6* |  |  |  |  |  |
| G240A | 1 | 72 | 308 | 7 | 14 |
| Wildtype | 95 | 1 | 71 | 444 | 207 |
| *benA* |  |  |  |  |  |
| F219Y | 13 | 0 | 131 | 26 | 1 |
| Wildtype | 83 | 73 | 248 | 425 | 220 |
| *cytB* |  |  |  |  |  |
| G143A | 9 | 0 | 108 | 18 | 0 |
| Wildtype | 87 | 73 | 271 | 433 | 221 |
| *sdhB* |  |  |  |  |  |
| H270Y | 0 | 0 | 27 | 3 | 0 |
| H270R | 0 | 0 | 8 | 0 | 0 |
| Wildtype | 96 | 73 | 344 | 448 | 221 |
| cyp51A |  |  |  |  |  |
| G54R | 1 | 0 | 0 | 2 | 2 |
| G54E | 0 | 0 | 1 | 0 | 1 |
| G54W | 0 | 0 | 2 | 4 | 5 |
| TR34/L98H | 19 | 72 | 175 | 19 | 0 |
| TR34 | 1 | 1 | 1 | 0 | 1 |
| TR34/L98H/T289A | 0 | 0 | 1 | 0 | 0 |
| TR34/L98H/T289A/I364V/G448S | 1 | 0 | 7 | 0 | 0 |
| TR46/Y121F/T289A | 1 | 0 | 47 | 8 | 0 |
| TR46/Y121F/T289A/G448S | 0 | 0 | 1 | 0 | 0 |
| TR46/Y121F/T289A/S363P/I364V/G448S | 0 | 0 | 5 | 0 | 0 |
| TR46 | 0 | 0 | 0 | 1 | 0 |
| TR120 | 0 | 0 | 0 | 1 | 0 |
| Wildtype | 73 | 0 | 138 | 397 | 210 |

Supplementary data

Supplementary Data 1 (xlsx): Metadata for all isolates included in this study, including source, location and date of isolation (where available), *cyp51a*, *benA, cytB* and *sdhB* mutations, and antifungal susceptibility. Where isolates have been included from publicly available datasets, the project accession number is provided. * indicates isolate used for crossing analysis based on data of Swilaiman *et al.* (2020). ± indicates isolate used for Bar-seq analysis.

Supplementary Data 2 (xlsx): Details of isolates used in crossing experiments representing all clusters, to determine whether restricted gene flow may arise from sexual incompatibility between azole-resistant and azole-sensitive isolates. REP denotes replicate.

Supplementary Data 3 (xlsx): Gene families associated with cluster and azole resistance. Scoary output of orthogroups associated with genotypic cluster and known azole resistance, combining InterProScan annotations and associated Af293 reference genes
