# Supplementary material for: Recent European origin of azole resistance in the critical priority fungal pathogen Aspergillus fumigatus
Source: Research Square preprint supplement (doi:10.21203/rs.3.rs-7905776/v1), 2025-11-13
Supplement: Supplementary file 4 [file ddf20daa4b79fec204e551eb.xlsx]

## Sheet: Sheet1
ID *	Year	Country	Cyp51A	MAT	Source	Genetic cluster	benA	cytb	sdhB	Project Accession (if submitted)
C1	2012	UK	TR34/L98H	MAT1-1	Clinical	3	Wildtype	Wildtype	Wildtype	PRJEB8623
C10	2010	Netherlands	TR34/L98H	MAT1-2	Clinical	3	F219Y	G143A	H270Y	PRJEB8623
C100±	2016	UK	Wildtype	MAT1-2	Clinical	5	Wildtype	Wildtype	Wildtype	PRJEB27135
C101	2015	UK	TR34/L98H	MAT1-2	Clinical	2	Wildtype	Wildtype	Wildtype	PRJEB27135
C102	2016	UK	G54R	MAT1-1	Clinical	4	Wildtype	Wildtype	Wildtype	PRJEB27135
C103	2015	UK	G54E	MAT1-1	Clinical	3	Wildtype	Wildtype	Wildtype	PRJEB27135
C104 ±	2015	UK	TR34/L98H	MAT1-2	Clinical	3	Wildtype	Wildtype	Wildtype	PRJEB27135
C105 ±	2016	UK	TR34/L98H	MAT1-2	Clinical	2	Wildtype	Wildtype	Wildtype	PRJEB27135
C106	2015	UK	G54W	MAT1-1	Clinical	5	Wildtype	Wildtype	Wildtype	PRJEB27135
C107 ±	2015	UK	TR34/L98H	MAT1-2	Clinical	2	Wildtype	Wildtype	Wildtype	PRJEB27135
C108	2015	UK	G54W	MAT1-1	Clinical	5	Wildtype	Wildtype	Wildtype	PRJEB27135
C109 ±	2015	UK	Wildtype	MAT1-2	Clinical	4	Wildtype	Wildtype	Wildtype	PRJEB27135
C11	2009	India	TR34/L98H	MAT1-1	Clinical	3	F219Y	G143A	Wildtype	PRJEB8623
C110 ±	2015	UK	Wildtype	MAT1-2	Clinical	4	Wildtype	Wildtype	Wildtype	PRJEB27135
C111	2015	UK	Wildtype	MAT1-2	Clinical	5	Wildtype	Wildtype	Wildtype	PRJEB27135
C112	2015	UK	G54W	MAT1-2	Clinical	4	Wildtype	Wildtype	Wildtype	PRJEB27135
C113	2015	UK	G54W	MAT1-2	Clinical	4	Wildtype	Wildtype	Wildtype	PRJEB27135
C114	2015	UK	G54W	MAT1-2	Clinical	4	Wildtype	Wildtype	Wildtype	PRJEB27135
C115	2015	UK	TR34/L98H	MAT1-2	Clinical	2	Wildtype	Wildtype	Wildtype	PRJEB27135
C116	2015	UK	TR34/L98H	MAT1-1	Clinical	2	Wildtype	Wildtype	Wildtype	PRJEB27135
C117	2015	UK	G54W	MAT1-2	Clinical	4	Wildtype	Wildtype	Wildtype	PRJEB27135
C118	2015	UK	Wildtype	MAT1-2	Clinical	4	Wildtype	Wildtype	Wildtype	PRJEB27135
C119	2015	UK	Wildtype	MAT1-2	Clinical	4	Wildtype	Wildtype	Wildtype	PRJEB27135
C12	2009	India	TR34/L98H	MAT1-1	Clinical	1	F219Y	G143A	Wildtype	PRJEB8623
C120	2015	UK	P216L	MAT1-1	Clinical	4	Wildtype	Wildtype	Wildtype	PRJEB27135
C121±	2015	UK	Wildtype	MAT1-2	Clinical	1	Wildtype	Wildtype	Wildtype	PRJEB27135
C122	2015	UK	G54W	MAT1-1	Clinical	5	Wildtype	Wildtype	Wildtype	PRJEB27135
C123	2015	UK	TR34/L98H	MAT1-1	Clinical	2	Wildtype	Wildtype	Wildtype	PRJEB27135
C124	2015	UK	G54W	MAT1-1	Clinical	3	Wildtype	Wildtype	Wildtype	PRJEB27135
C125	2015	UK	TR34/L98H	MAT1-2	Clinical	2	Wildtype	Wildtype	Wildtype	PRJEB27135
C126 ±	2015	UK	TR34/L98H	MAT1-2	Clinical	3	Wildtype	Wildtype	Wildtype	PRJEB27135
C127	2015	UK	P216L	MAT1-2	Clinical	4	Wildtype	Wildtype	Wildtype	PRJEB27135
C128	2009	UK	Wildtype	MAT1-2	Clinical	4	Wildtype	Wildtype	Wildtype	PRJEB27135
C129	2009	UK	Wildtype	MAT1-2	Clinical	4	Wildtype	Wildtype	Wildtype	PRJEB27135
C13	2011	India	TR34/L98H	MAT1-2	Clinical	4	F219Y	Wildtype	Wildtype	PRJEB8623
C130	2009	UK	Wildtype	MAT1-2	Clinical	4	Wildtype	Wildtype	Wildtype	PRJEB27135
C131	2009	UK	TR34/L98H	MAT1-1	Clinical	3	Wildtype	Wildtype	Wildtype	PRJEB27135
C132	2009	UK	TR34/L98H	MAT1-1	Clinical	3	Wildtype	Wildtype	Wildtype	PRJEB27135
C133	2009	UK	TR34/L98H	MAT1-1	Clinical	3	Wildtype	Wildtype	Wildtype	PRJEB27135
C134	2009	UK	Wildtype	MAT1-2	Clinical	4	Wildtype	Wildtype	Wildtype	PRJEB27135
C135	2009	UK	Wildtype	MAT1-2	Clinical	4	Wildtype	Wildtype	Wildtype	PRJEB27135
C136	2009	UK	Wildtype	MAT1-2	Clinical	4	Wildtype	Wildtype	Wildtype	PRJEB27135
C137	2016	UK	TR34/L98H/T289A/I364V/G448S	MAT1-2	Clinical	3	F219Y	G143A	Wildtype	PRJEB27135
C138	2016	UK	TR34/L98H/T289A/I364V/G448S	MAT1-2	Clinical	3	F219Y	G143A	Wildtype	PRJEB27135
C139	2016	UK	TR34/L98H/T289A/I364V/G448S	MAT1-2	Clinical	1	F219Y	Wildtype	Wildtype	PRJEB27135
C14	2012	India	TR34/L98H	MAT1-1	Clinical	3	F219Y	G143A	Wildtype	PRJEB8623
C140	2016	UK	TR34/L98H/T289A/I364V/G448S	MAT1-2	Clinical	3	F219Y	G143A	Wildtype	PRJEB27135
C141	2016	UK	TR34/L98H	MAT1-2	Clinical	3	Wildtype	Wildtype	Wildtype	PRJEB27135
C142 ±	2016	UK	TR34/L98H	MAT1-2	Clinical	3	Wildtype	Wildtype	Wildtype	PRJEB27135
C143 ±	2017	UK	TR34/L98H	MAT1-1	Clinical	2	Wildtype	Wildtype	Wildtype	PRJEB27135
C144	2015	UK	Wildtype	MAT1-1	Clinical	3	Wildtype	Wildtype	Wildtype	PRJEB27135
C145	2015	UK	G54W	MAT1-1	Clinical	3	Wildtype	Wildtype	Wildtype	PRJEB27135
C146	2015	UK	Wildtype	MAT1-2	Clinical	4	Wildtype	Wildtype	Wildtype	PRJEB27135
C147	2014	UK	Wildtype	MAT1-1	Clinical	5	Wildtype	Wildtype	Wildtype	PRJEB27135
C148 ±	2015	UK	Wildtype	MAT1-2	Clinical	1	Wildtype	Wildtype	Wildtype	PRJEB27135
C149	2015	UK	Wildtype	MAT1-1	Clinical	4	Wildtype	Wildtype	Wildtype	PRJEB27135
C15	2009	Japan	Wildtype	MAT1-1	Clinical	4	F219Y	Wildtype	Wildtype	PRJDB1541
C150	2016	UK	Wildtype	MAT1-1	Clinical	5	Wildtype	Wildtype	Wildtype	PRJEB27135
C151	2015	UK	Wildtype	MAT1-2	Clinical	4	Wildtype	Wildtype	Wildtype	PRJEB27135
C152±	2015	UK	Wildtype	MAT1-2	Clinical	4	Wildtype	Wildtype	Wildtype	PRJEB27135
C153	2015	UK	TR34/L98H	MAT1-2	Clinical	3	Wildtype	Wildtype	Wildtype	PRJEB27135
C154	2016	UK	Wildtype	MAT1-2	Clinical	5	Wildtype	Wildtype	Wildtype	PRJEB27135
C155	2015	UK	Wildtype	MAT1-1	Clinical	4	Wildtype	Wildtype	Wildtype	PRJEB27135
C156	2015	UK	Wildtype	MAT1-1	Clinical	4	Wildtype	Wildtype	Wildtype	PRJEB27135
C157	2016	UK	Wildtype	MAT1-2	Clinical	4	Wildtype	Wildtype	Wildtype	PRJEB27135
C158	2016	UK	Wildtype	MAT1-1	Clinical	5	Wildtype	Wildtype	Wildtype	PRJEB27135
C159	2015	UK	Wildtype	MAT1-1	Clinical	3	Wildtype	Wildtype	Wildtype	PRJEB27135
C16	2009	Japan	Wildtype	MAT1-2	Clinical	4	Wildtype	Wildtype	Wildtype	PRJDB1541
C160 ±	2015	UK	Wildtype	MAT1-2	Clinical	4	Wildtype	Wildtype	Wildtype	PRJEB27135
C161	2015	UK	Wildtype	MAT1-1	Clinical	5	Wildtype	Wildtype	Wildtype	PRJEB27135
C162 ±	2015	UK	Wildtype	MAT1-2	Clinical	4	Wildtype	Wildtype	Wildtype	PRJEB27135
C163	2015	UK	Wildtype	MAT1-1	Clinical	5	Wildtype	Wildtype	Wildtype	PRJEB27135
C164±	2015	UK	Wildtype	MAT1-2	Clinical	4	Wildtype	Wildtype	Wildtype	PRJEB27135
C165±	2015	UK	Wildtype	MAT1-2	Clinical	4	Wildtype	Wildtype	Wildtype	PRJEB27135
C166±	2015	UK	Wildtype	MAT1-2	Clinical	4	Wildtype	Wildtype	Wildtype	PRJEB27135
C167	2015	UK	Wildtype	MAT1-1	Clinical	4	Wildtype	Wildtype	Wildtype	PRJEB27135
C168	2016	UK	Wildtype	MAT1-1	Clinical	3	Wildtype	Wildtype	Wildtype	PRJEB27135
C169±	2014	UK	Wildtype	MAT1-2	Clinical	1	Wildtype	Wildtype	Wildtype	PRJEB27135
C17	2007	Japan	Wildtype	MAT1-1	Clinical	4	Wildtype	Wildtype	Wildtype	PRJDB1541
C170	2014	UK	Wildtype	MAT1-1	Clinical	3	Wildtype	Wildtype	Wildtype	PRJEB27135
C171	2014	UK	G54R	MAT1-2	Clinical	5	Wildtype	Wildtype	Wildtype	PRJEB27135
C172±	2014	UK	Wildtype	MAT1-1	Clinical	4	Wildtype	Wildtype	Wildtype	PRJEB27135
C173	2015	UK	Wildtype	MAT1-2	Clinical	4	Wildtype	Wildtype	Wildtype	PRJEB27135
C174	1937		Wildtype	MAT1-1	Clinical	3	Wildtype	Wildtype	Wildtype
C175	1945		Wildtype	MAT1-1	Clinical	1	Wildtype	Wildtype	Wildtype
C176	1921	USA	Wildtype	MAT1-2	Clinical	3	Wildtype	Wildtype	Wildtype
C177	2015	Australia	Wildtype	MAT1-1	Clinical	5	Wildtype	Wildtype	Wildtype
C178	2015	Australia	Wildtype	MAT1-1	Clinical	4	Wildtype	Wildtype	Wildtype
C179	2017	Australia	G54R	MAT1-1	Clinical	4	Wildtype	Wildtype	Wildtype
C18	2009	Japan	Wildtype	MAT1-2	Clinical	4	Wildtype	Wildtype	Wildtype	PRJDB1541
C180	2016	Australia	Wildtype	MAT1-2	Clinical	5	Wildtype	Wildtype	Wildtype
C181	2012	Australia	Wildtype	MAT1-1	Clinical	3	Wildtype	Wildtype	Wildtype
C182	2016	Australia	Wildtype	MAT1-2	Clinical	5	Wildtype	Wildtype	Wildtype
C183	2016	Australia	Wildtype	MAT1-2	Clinical	5	Wildtype	Wildtype	Wildtype
C184	2015	Australia	Wildtype	MAT1-2	Clinical	5	Wildtype	Wildtype	Wildtype
C185	2016	Australia	G54R	MAT1-1	Clinical	5	Wildtype	Wildtype	Wildtype
C186	2016	Australia	TR34/L98H	MAT1-2	Clinical	3	F219Y	G143A	H270Y
C187 ±	2011	Germany	TR34/L98H	MAT1-2	Clinical	3	Wildtype	Wildtype	Wildtype
C188	2014	Taiwan	TR34/L98H	MAT1-1	Clinical	4	Wildtype	Wildtype	Wildtype
C189	2017	Colombia	Wildtype	MAT1-2	Clinical	4	Wildtype	Wildtype	Wildtype
C19	2011	Japan	Wildtype	MAT1-2	Clinical	5	Wildtype	Wildtype	Wildtype	PRJDB1541
C190	2017	Colombia	Wildtype	MAT1-2	Clinical	4	Wildtype	Wildtype	Wildtype
C191		Republic of Ireland	TR34/L98H	MAT1-2	Clinical	3	Wildtype	Wildtype	Wildtype	PRJEB27135
C192		Republic of Ireland	TR34/L98H	MAT1-1	Clinical	3	Wildtype	Wildtype	Wildtype	PRJEB27135
C193		Republic of Ireland	TR34/L98H	MAT1-2	Clinical	3	F219Y	Wildtype	Wildtype	PRJEB27135
C194		Republic of Ireland	TR34/L98H	MAT1-1	Environmental	3	Wildtype	Wildtype	Wildtype	PRJEB27135
C195		Republic of Ireland	TR46/Y121F/T289A	MAT1-2	Clinical	3	F219Y	G143A	Wildtype	PRJEB27135
C196		Republic of Ireland	TR34/L98H	MAT1-2	Clinical	3	F219Y	Wildtype	Wildtype	PRJEB27135
C197		Republic of Ireland	TR46/Y121F/T289A	MAT1-2	Clinical	3	F219Y	G143A	Wildtype	PRJEB27135
C198		Republic of Ireland	Wildtype	MAT1-2	Clinical	4	Wildtype	Wildtype	Wildtype	PRJEB27135
C199		Republic of Ireland	Wildtype	MAT1-2	Clinical	3	Wildtype	Wildtype	Wildtype	PRJEB27135
C2	2012	UK	TR34/L98H	MAT1-1	Clinical	3	Wildtype	Wildtype	Wildtype	PRJEB8623
C20	2009	Japan	Wildtype	MAT1-2	Clinical	4	Wildtype	Wildtype	Wildtype	PRJDB1541
C200		Republic of Ireland	Wildtype	MAT1-2	Clinical	4	Wildtype	Wildtype	Wildtype	PRJEB27135
C201±	2015	Belgium	TR46/Y121F/T289A	MAT1-2	Environmental	3	F219Y	G143A	Wildtype
C202	2014	Belgium	TR46/Y121F/T289A	MAT1-1	Environmental	3	F219Y	G143A	Wildtype
C203	2016	Belgium	TR34/L98H	MAT1-2	Environmental	2	Wildtype	Wildtype	Wildtype
C204	2016	Belgium	TR46/Y121F/T289A	MAT1-1	Environmental	3	F219Y	G143A	H270Y
C205	2016	Belgium	TR34/L98H	MAT1-1	Environmental	1	Wildtype	G143A	Wildtype
C206	2016	Belgium	TR34/L98H	MAT1-1	Environmental	3	F219Y	G143A	Wildtype
C207 ±	2016	Belgium	TR46/Y121F/T289A	MAT1-2	Environmental	3	F219Y	G143A	Wildtype
C208	2017	Belgium	TR46/Y121F/T289A	MAT1-2	Environmental	3	F219Y	G143A	Wildtype
C209	2013	Japan	Wildtype	MAT1-1	Clinical	3	Wildtype	Wildtype	Wildtype
C21	2012	Japan	Wildtype	MAT1-1	Clinical	4	Wildtype	Wildtype	Wildtype	PRJDB1541
C210	2013	Japan	Wildtype	MAT1-2	Clinical	4	Wildtype	Wildtype	Wildtype
C211	2013	Japan	Wildtype	MAT1-2	Clinical	4	Wildtype	Wildtype	Wildtype
C212	2015	Japan	Wildtype	MAT1-2	Clinical	4	Wildtype	Wildtype	Wildtype
C213	2015	Japan	Wildtype	MAT1-2	Clinical	4	Wildtype	Wildtype	Wildtype
C214	2016	Japan	TR34/L98H	MAT1-1	Clinical	3	Wildtype	Wildtype	Wildtype
C215±	1998	Netherlands	TR34/L98H	MAT1-2	Clinical	1	Wildtype	Wildtype	Wildtype
C216	2000	Netherlands	TR34/L98H	MAT1-2	Clinical	3	Wildtype	Wildtype	Wildtype
C217	2001	Netherlands	TR34/L98H	MAT1-2	Clinical	3	Wildtype	Wildtype	Wildtype
C218	2002	Netherlands	TR34/L98H	MAT1-2	Clinical	3	F219Y	Wildtype	Wildtype
C219	2003	Netherlands	TR34/L98H	MAT1-2	Clinical	3	F219Y	Wildtype	Wildtype
C22	2012	Japan	Wildtype	MAT1-2	Clinical	5	Wildtype	Wildtype	Wildtype	PRJDB1541
C220	2004	Netherlands	TR34/L98H	MAT1-2	Clinical	3	Wildtype	Wildtype	Wildtype
C221	2005	Netherlands	TR34/L98H	MAT1-2	Clinical	3	Wildtype	Wildtype	Wildtype
C222	2006	Netherlands	TR34/L98H	MAT1-2	Clinical	3	Wildtype	Wildtype	Wildtype
C223	2007	Netherlands	TR34/L98H	MAT1-2	Clinical	3	Wildtype	Wildtype	Wildtype
C224	2007	Netherlands	TR34/L98H	MAT1-2	Clinical	3	F219Y	Wildtype	Wildtype
C225	2007	Netherlands	TR34/L98H	MAT1-2	Clinical	3	F219Y	Wildtype	Wildtype
C226	2008	Netherlands	TR34/L98H	MAT1-2	Clinical	3	Wildtype	Wildtype	Wildtype
C227	2008	Netherlands	TR34/L98H	MAT1-2	Clinical	3	Wildtype	Wildtype	Wildtype
C228	2008	Netherlands	TR34/L98H	MAT1-2	Clinical	3	F219Y	Wildtype	Wildtype
C229	2009	Netherlands	TR34/L98H	MAT1-2	Clinical	3	F219Y	Wildtype	Wildtype
C23	2009	Japan	Wildtype	MAT1-2	Clinical	4	Wildtype	Wildtype	Wildtype	PRJDB1541
C230	2009	Netherlands	TR46/Y121F/T289A	MAT1-2	Clinical	3	F219Y	G143A	Wildtype
C231	2010	Netherlands	TR34/L98H	MAT1-2	Clinical	3	F219Y	G143A	H270Y
C232	2010	Netherlands	TR46/Y121F/T289A	MAT1-2	Clinical	3	F219Y	G143A	Wildtype
C233	2011	Netherlands	TR34/L98H	MAT1-2	Clinical	3	F219Y	G143A	Wildtype
C234	2012	Netherlands	TR34/L98H	MAT1-2	Clinical	3	F219Y	G143A	H270Y
C235	2012	Netherlands	TR46/Y121F/T289A	MAT1-2	Clinical	4	F219Y	G143A	H270Y
C236	2013	Netherlands	TR46/Y121F/T289A	MAT1-2	Clinical	3	F219Y	G143A	Wildtype
C237	2014	Netherlands	TR34/L98H	MAT1-2	Clinical	3	Wildtype	Wildtype	Wildtype
C238	2016	Netherlands	Wildtype	MAT1-2	Clinical	4	Wildtype	Wildtype	Wildtype
C239	2016	Netherlands	TR34/L98H	MAT1-2	Clinical	3	Wildtype	Wildtype	Wildtype
C24	2009	Japan	Wildtype	MAT1-2	Clinical	4	Wildtype	Wildtype	Wildtype	PRJDB1541
C240	2016	Netherlands	TR34/L98H	MAT1-2	Clinical	3	F219Y	Wildtype	H270Y
C241	2016	Netherlands	TR34/L98H	MAT1-2	Clinical	3	F219Y	Wildtype	Wildtype
C242	2016	Netherlands	TR34/L98H	MAT1-2	Clinical	3	F219Y	G143A	Wildtype
C243	2016	Netherlands	TR34/L98H	MAT1-2	Clinical	3	Wildtype	Wildtype	Wildtype
C244	2016	Netherlands	TR46/Y121F/T289A	MAT1-2	Clinical	3	F219Y	G143A	H270Y
C245±	2017	Netherlands	TR34/L98H	MAT1-2	Clinical	1	F219Y	G143A	Wildtype
C246 ±	2017	Netherlands	TR34/L98H	MAT1-2	Clinical	3	Wildtype	Wildtype	Wildtype
C247	2017	Netherlands	TR46/Y121F/T289A	MAT1-2	Clinical	3	F219Y	G143A	Wildtype
C248	2017	Netherlands	TR46/Y121F/T289A	MAT1-2	Clinical	3	F219Y	G143A	H270Y
C249	2017	Netherlands	TR46/Y121F/T289A	MAT1-2	Clinical	4	F219Y	G143A	Wildtype
C25	2009	Japan	Wildtype	MAT1-2	Clinical	1	Wildtype	Wildtype	Wildtype	PRJDB1541
C250		USA	Wildtype	MAT-1-1	Clinical	1	Wildtype	Wildtype	Wildtype
C251		USA	Wildtype	MAT1-2	Clinical	4	Wildtype	Wildtype	Wildtype
C252	2018	USA	Wildtype	MAT1-2	Clinical	4	Wildtype	Wildtype	Wildtype
C253	2013	USA	G54W	MAT1-2	Clinical	5	Wildtype	Wildtype	Wildtype
C254		USA	Wildtype	MAT1-2	Clinical	4	Wildtype	Wildtype	Wildtype
C255		USA	Wildtype	MAT1-2	Clinical	5	Wildtype	Wildtype	Wildtype
C256		USA	Wildtype	MAT1-2	Clinical	4	Wildtype	Wildtype	Wildtype
C257		USA	Wildtype	MAT1-2	Clinical	4	Wildtype	Wildtype	Wildtype
C258		USA	Wildtype	MAT1-2	Clinical	5	Wildtype	Wildtype	Wildtype
C259	2015	USA	Wildtype	MAT1-2	Clinical	5	Wildtype	Wildtype	Wildtype
C26	2010	Japan	Wildtype	MAT1-2	Clinical	4	Wildtype	Wildtype	Wildtype	PRJDB1541
C260	2015	USA	Wildtype	MAT1-2	Clinical	5	Wildtype	Wildtype	Wildtype
C261	2013	USA	P216L	MAT1-2	Clinical	4	Wildtype	Wildtype	Wildtype
C262		USA	Wildtype	MAT1-2	Clinical	3	Wildtype	Wildtype	Wildtype
C263	2012	USA	Wildtype	MAT1-2	Clinical	1	Wildtype	Wildtype	Wildtype
C264	2011	USA	Wildtype	MAT1-2	Clinical	5	Wildtype	Wildtype	Wildtype
C265	2012	USA	Wildtype	MAT1-2	Clinical	4	Wildtype	Wildtype	Wildtype
C266	2011	USA	Wildtype	MAT1-2	Clinical	4	Wildtype	Wildtype	Wildtype
C267	2010	USA	Wildtype	MAT1-2	Clinical	4	Wildtype	Wildtype	Wildtype
C268	2011	USA	Wildtype	MAT1-2	Clinical	5	Wildtype	Wildtype	Wildtype
C269	2012	USA	Wildtype	MAT1-2	Clinical	5	Wildtype	Wildtype	Wildtype
C27	2010	Japan	Wildtype	MAT1-1	Clinical	4	Wildtype	Wildtype	Wildtype	PRJDB1541
C270	2010	USA	Wildtype	MAT1-2	Clinical	4	Wildtype	Wildtype	Wildtype
C271	2010	USA	Wildtype	MAT1-2	Clinical	4	Wildtype	Wildtype	Wildtype
C272	2010	USA	Wildtype	MAT1-2	Clinical	5	Wildtype	Wildtype	Wildtype
C273	2010	USA	Wildtype	MAT1-2	Clinical	4	Wildtype	Wildtype	Wildtype
C274	2013	USA	Wildtype	MAT1-2	Clinical	4	Wildtype	Wildtype	Wildtype
C275	2011	USA	Wildtype	MAT1-2	Clinical	4	Wildtype	Wildtype	Wildtype
C276	2012	USA	Wildtype	MAT1-2	Clinical	5	Wildtype	Wildtype	Wildtype
C277	2012	USA	Wildtype	MAT1-2	Clinical	5	Wildtype	Wildtype	Wildtype
C278	2012	USA	Wildtype	MAT1-2	Clinical	4	Wildtype	Wildtype	Wildtype
C279	2012	USA	Wildtype	MAT1-2	Clinical	1	Wildtype	Wildtype	Wildtype
C28	2012	Japan	Wildtype	MAT1-1	Clinical	4	Wildtype	Wildtype	Wildtype	PRJDB1541
C280	2012	USA	Wildtype	MAT1-2	Clinical	4	Wildtype	Wildtype	Wildtype
C281	2012	USA	Wildtype	MAT1-2	Clinical	4	Wildtype	Wildtype	Wildtype
C282	2011	USA	Wildtype	MAT1-2	Clinical	1	Wildtype	Wildtype	Wildtype
C283		USA	Wildtype	MAT1-2	Clinical	5	Wildtype	Wildtype	Wildtype
C284		USA	Wildtype	MAT1-2	Clinical	4	Wildtype	Wildtype	Wildtype
C285		USA	Wildtype	MAT1-2	Environmental	4	Wildtype	Wildtype	Wildtype
C286		USA	Wildtype	MAT1-2	Environmental	4	Wildtype	Wildtype	Wildtype
C287		USA	Wildtype	MAT1-2	Environmental	4	Wildtype	Wildtype	Wildtype
C288		USA	Wildtype	MAT1-2	Environmental	4	Wildtype	Wildtype	Wildtype
C289		USA	Wildtype	MAT1-2	Environmental	4	Wildtype	Wildtype	Wildtype
C29	2012	Japan	Wildtype	MAT1-2	Clinical	4	Wildtype	Wildtype	Wildtype	PRJDB1541
C290		USA	Wildtype	MAT1-2	Clinical	4	Wildtype	Wildtype	Wildtype
C291		USA	Wildtype	MAT1-2	Environmental	4	Wildtype	Wildtype	Wildtype
C292		USA	Wildtype	MAT1-2	Clinical	4	Wildtype	Wildtype	Wildtype
C293		USA	Wildtype	MAT1-2	Clinical	4	Wildtype	Wildtype	Wildtype
C294		USA	Wildtype	MAT1-2	Environmental	5	Wildtype	Wildtype	Wildtype
C295		USA	Wildtype	MAT1-2	Clinical	4	Wildtype	Wildtype	Wildtype
C296		USA	Wildtype	MAT1-2	Clinical	5	Wildtype	Wildtype	Wildtype
C297		USA	Wildtype	MAT1-2	Clinical	5	Wildtype	Wildtype	Wildtype
C298		USA	Wildtype	MAT1-2	Clinical	4	Wildtype	Wildtype	Wildtype
C299		USA	Wildtype	MAT1-2	Clinical	5	Wildtype	Wildtype	Wildtype
C3	2009	UK	Wildtype	MAT1-2	Clinical	4	Wildtype	Wildtype	Wildtype	PRJEB8623
C30	2013	Japan	Wildtype	MAT1-1	Clinical	4	Wildtype	Wildtype	Wildtype	PRJDB1541
C300		UK	Wildtype	MAT1-2	Environmental	4	Wildtype	Wildtype	Wildtype
C301		UK	Wildtype	MAT1-2	Environmental	5	Wildtype	Wildtype	Wildtype
C302		USA	Wildtype	MAT1-2	Clinical	5	Wildtype	Wildtype	Wildtype
C303		USA	Wildtype	MAT1-2	Clinical	4	Wildtype	Wildtype	Wildtype
C304		USA	Wildtype	MAT1-2	Clinical	4	Wildtype	Wildtype	Wildtype
C305		USA	Wildtype	MAT1-2	Clinical (listed as Environmental in Cramer lab database)	4	Wildtype	Wildtype	Wildtype
C306	2016	UK	TR34/L98H	MAT1-1	Clinical	3	Wildtype	Wildtype	Wildtype
C307 ±	2017	UK	TR34/L98H	MAT1-1	Clinical	3	Wildtype	Wildtype	Wildtype
C308±	2018	UK	TR34/L98H	MAT1-1	Clinical	3	Wildtype	Wildtype	Wildtype
C309 ±	2018	UK	TR34/L98H	MAT1-2	Clinical	2	Wildtype	Wildtype	Wildtype
C31	2014	Japan	Wildtype	MAT1-1	Clinical	4	Wildtype	Wildtype	Wildtype	PRJDB1541
C310	2016	UK	TR34/L98H	MAT1-1	Clinical	2	Wildtype	Wildtype	Wildtype
C311±	2017	UK	Wildtype	MAT1-2	Clinical	5	Wildtype	Wildtype	Wildtype
C312	2015	UK	Wildtype	MAT1-1	Clinical	4	Wildtype	Wildtype	Wildtype
C313 ±	2017	UK	Wildtype	MAT1-1	Clinical	4	Wildtype	Wildtype	Wildtype
C314±	2017	UK	Wildtype	MAT1-1	Clinical	1	Wildtype	Wildtype	Wildtype
C315	2017	UK	Wildtype	MAT1-1	Clinical	4	Wildtype	Wildtype	Wildtype
C316	2017	UK	Wildtype	MAT1-1	Clinical	4	Wildtype	Wildtype	Wildtype
C317 ±	2016	UK	M220K	MAT1-1	Clinical	4	Wildtype	Wildtype	Wildtype
C318	2018	UK	TR34/L98H	MAT1-1	Clinical	4	Wildtype	Wildtype	Wildtype
C319	2017	UK	TR34/L98H	MAT1-1	Clinical	3	F219Y	Wildtype	Wildtype
C32	1989	France	Wildtype	MAT1-1	Clinical	4	Wildtype	Wildtype	Wildtype	SRP151231
C320	2016	UK	TR34/L98H	MAT1-1	Clinical	2	Wildtype	Wildtype	Wildtype
C321	2017	UK	TR34/L98H	MAT1-1	Clinical	2	Wildtype	Wildtype	Wildtype
C322±	2018	UK	TR34/L98H	MAT1-1	Clinical	2	Wildtype	Wildtype	Wildtype
C323 ±	2017	UK	TR34/L98H	MAT1-2	Clinical	2	Wildtype	Wildtype	Wildtype
C324	2015	UK	Wildtype	MAT1-2	Clinical	5	Wildtype	Wildtype	Wildtype
C325	2017	UK	Wildtype	MAT1-2	Clinical	5	Wildtype	Wildtype	Wildtype
C326±	2018	UK	Wildtype	MAT1-2	Clinical	5	Wildtype	Wildtype	Wildtype
C327	2018	UK	Wildtype	MAT1-1	Clinical	5	Wildtype	Wildtype	Wildtype
C328±	2018	UK	Wildtype	MAT1-1	Clinical	5	Wildtype	Wildtype	Wildtype
C329±	2017	UK	Wildtype	MAT1-1	Clinical	1	Wildtype	Wildtype	Wildtype
C33	1997	UK	Wildtype	MAT1-2	Clinical	3	Wildtype	Wildtype	Wildtype	PRJEB8623
C330	2017	UK	TR34/L98H	MAT1-1	Clinical	3	F219Y	G143A	Wildtype
C331±	2017	UK	Wildtype	MAT1-2	Clinical	4	Wildtype	Wildtype	Wildtype
C332±	2017	UK	Wildtype	MAT1-2	Clinical	4	Wildtype	Wildtype	Wildtype
C333	2017	UK	Wildtype	MAT1-2	Clinical	1	Wildtype	Wildtype	Wildtype
C334±	2017	UK	Wildtype	MAT1-1	Clinical	4	Wildtype	Wildtype	Wildtype
C335	2016	UK	Wildtype	MAT1-2	Clinical	5	Wildtype	Wildtype	Wildtype
C336	2016	UK	Wildtype	MAT1-1	Clinical	4	Wildtype	Wildtype	Wildtype
C337	2016	UK	Wildtype	MAT1-1	Clinical	4	Wildtype	Wildtype	Wildtype
C338	2017	UK	Wildtype	MAT1-2	Clinical	4	Wildtype	Wildtype	Wildtype
C339	2015	UK	Wildtype	MAT1-1	Clinical	4	Wildtype	Wildtype	Wildtype
C34±	2013	UK	TR34/L98H	MAT1-2	Clinical	2	Wildtype	Wildtype	Wildtype	PRJEB27135
C340	2016	UK	Wildtype	MAT1-1	Clinical	4	Wildtype	Wildtype	Wildtype
C341	2016	UK	Wildtype	MAT1-2	Clinical	4	Wildtype	Wildtype	Wildtype
C342 ±	2017	UK	Wildtype	MAT1-2	Clinical	4	Wildtype	Wildtype	Wildtype
C343 ±	2017	UK	Wildtype	MAT1-1	Clinical	5	Wildtype	Wildtype	Wildtype
C344	2018	UK	Wildtype	MAT1-1	Clinical	4	Wildtype	Wildtype	Wildtype
C345	2016	UK	Wildtype	MAT1-1	Clinical	4	Wildtype	Wildtype	Wildtype
C346	2017	UK	TR34/L98H	MAT1-1	Clinical	3	Wildtype	Wildtype	Wildtype
C347	2017	UK	Wildtype	MAT1-1	Clinical	4	Wildtype	Wildtype	Wildtype
C348	2016	UK	TR34/L98H	MAT1-1	Clinical	2	Wildtype	Wildtype	Wildtype
C349±	2017	UK	TR34/L98H	MAT1-1	Clinical	3	F219Y	G143A	H270Y
C35	2015	UK	TR34/L98H	MAT1-2	Clinical	2	Wildtype	Wildtype	Wildtype	PRJEB27135
C350	2015	UK	Wildtype	MAT1-2	Clinical	5	Wildtype	Wildtype	Wildtype
C351	2016	UK	L98H/M220K	MAT1-2	Clinical	4	Wildtype	Wildtype	Wildtype
C352	2016	UK	L98H/M220K	MAT1-2	Clinical	4	Wildtype	Wildtype	Wildtype
C353	2018	UK	L98H/M220K	MAT1-1	Clinical	4	Wildtype	Wildtype	Wildtype
C354	2017	UK	Wildtype	MAT1-2	Clinical	4	Wildtype	Wildtype	Wildtype
C355	2016	UK	Wildtype	MAT1-2	Clinical	1	Wildtype	Wildtype	Wildtype
C356	2016	UK	Wildtype	MAT1-2	Clinical	4	Wildtype	Wildtype	Wildtype
C357	2017	UK	Wildtype	MAT1-1	Clinical	4	Wildtype	Wildtype	Wildtype
C358	2016	UK	TR34/L98H	MAT1-1	Clinical	4	Wildtype	Wildtype	Wildtype
C36	2015	UK	Wildtype	MAT1-1	Clinical	5	Wildtype	Wildtype	Wildtype	PRJEB27135
C360 ±	2017	UK	Wildtype	MAT1-2	Clinical	5	Wildtype	Wildtype	Wildtype
C361	2016	UK	Wildtype	MAT1-1	Clinical	4	Wildtype	Wildtype	Wildtype
C362	2016	UK	Wildtype	MAT1-2	Clinical	5	Wildtype	Wildtype	Wildtype
C363	2017	UK	Wildtype	MAT1-1	Clinical	1	Wildtype	Wildtype	Wildtype
C364	2016	UK	Wildtype	MAT1-2	Clinical	1	Wildtype	Wildtype	Wildtype
C365±	2018	UK	Wildtype	MAT1-1	Clinical	3	Wildtype	Wildtype	Wildtype
C366	2016	UK	Wildtype	MAT1-2	Clinical	5	Wildtype	Wildtype	Wildtype
C367	2017	UK	Wildtype	MAT1-1	Clinical	3	Wildtype	Wildtype	Wildtype
C368±	2017	UK	Wildtype	MAT1-2	Clinical	5	Wildtype	Wildtype	Wildtype
C369	2016	UK	Wildtype	MAT1-2	Clinical	4	Wildtype	Wildtype	Wildtype
C37	2013	UK	Wildtype	MAT1-1	Clinical	3	Wildtype	Wildtype	Wildtype	PRJEB27135
C370	2017	UK	Wildtype	MAT1-2	Clinical	1	Wildtype	Wildtype	Wildtype
C371±	2017	UK	Wildtype	MAT1-2	Clinical	5	Wildtype	Wildtype	Wildtype
C372	2016	UK	G54W	MAT1-2	Clinical	5	Wildtype	Wildtype	Wildtype
C373±	2017	UK	Wildtype	MAT1-2	Clinical	4	Wildtype	Wildtype	Wildtype
C374	2016	UK	Wildtype	MAT1-1	Clinical	3	Wildtype	Wildtype	Wildtype
C375	2016	UK	Wildtype	MAT1-2	Clinical	5	Wildtype	Wildtype	Wildtype
C376±	2018	UK	Wildtype	MAT1-2	Clinical	4	Wildtype	Wildtype	Wildtype
C377	2018	UK	TR34/L98H	MAT1-2	Clinical	2	Wildtype	Wildtype	Wildtype
C378±	2016	UK	Wildtype	MAT1-2	Clinical	4	Wildtype	Wildtype	Wildtype
C379	2016	UK	Wildtype	MAT1-2	Clinical	4	Wildtype	Wildtype	Wildtype
C38	2013	UK	Wildtype	MAT1-1	Clinical	3	Wildtype	Wildtype	Wildtype	PRJEB27135
C380±	2018	UK	Wildtype	MAT1-1	Clinical	4	Wildtype	Wildtype	Wildtype
C381±	2017	UK	Wildtype	MAT1-2	Clinical	5	Wildtype	Wildtype	Wildtype
C382	2016	UK	Wildtype	MAT1-2	Clinical	4	Wildtype	Wildtype	Wildtype
C383	2019	UK	Wildtype	MAT1-1	Clinical	4	Wildtype	Wildtype	Wildtype
C384	2016	UK	Wildtype	MAT1-2	Clinical	5	Wildtype	Wildtype	Wildtype
C385	2017	UK	Wildtype	MAT1-1	Clinical	4	Wildtype	Wildtype	Wildtype
C386±	2017	UK	Wildtype	MAT1-1	Clinical	4	Wildtype	Wildtype	Wildtype
C387	2016	UK	Wildtype	MAT1-2	Clinical	3	Wildtype	Wildtype	Wildtype
C388±	2017	UK	Wildtype	MAT1-2	Clinical	1	Wildtype	Wildtype	Wildtype
C389	2017	UK	Wildtype	MAT1-2	Clinical	4	Wildtype	Wildtype	Wildtype
C39	2014	UK	Wildtype	MAT1-1	Clinical	5	Wildtype	Wildtype	Wildtype	PRJEB27135
C390	2016	UK	Wildtype	MAT1-2	Clinical	4	Wildtype	Wildtype	Wildtype
C391 ±	2017	UK	Wildtype	MAT1-2	Clinical	3	Wildtype	Wildtype	Wildtype
C392	2017	UK	Wildtype	MAT1-1	Clinical	3	Wildtype	Wildtype	Wildtype
C393	2016	UK	Wildtype	MAT1-1	Clinical	5	Wildtype	Wildtype	Wildtype
C395	2017	UK	Wildtype	MAT1-2	Clinical	5	Wildtype	Wildtype	Wildtype
C396	2017	UK	Wildtype	MAT1-1	Clinical	4	Wildtype	Wildtype	Wildtype
C397	2018	UK	Wildtype	MAT1-2	Clinical	4	Wildtype	Wildtype	Wildtype
C398 ±	2018	UK	Wildtype	MAT1-2	Clinical	5	Wildtype	Wildtype	Wildtype
C399	2016	UK	Wildtype	MAT1-2	Clinical	4	Wildtype	Wildtype	Wildtype
C4	2012	UK	Wildtype	MAT1-1	Clinical	3	Wildtype	Wildtype	Wildtype	PRJEB8623
C40	2014	UK	Wildtype	MAT1-1	Clinical	3	Wildtype	Wildtype	Wildtype	PRJEB27135
C400	2016	UK	Wildtype	MAT1-2	Clinical	4	Wildtype	Wildtype	Wildtype
C401		UK	Wildtype	MAT1-2	Clinical	1	Wildtype	Wildtype	Wildtype
C402	2020	Netherlands	Wildtype	MAT1-2	Clinical	5	Wildtype	Wildtype	Wildtype
C403	2020	Netherlands	Wildtype	MAT1-2	Clinical	4	Wildtype	Wildtype	Wildtype
C404	2020	Netherlands	Wildtype	MAT1-2	Clinical	5	Wildtype	Wildtype	Wildtype
C405	2020	Netherlands	Wildtype	MAT1-2	Clinical	5	Wildtype	Wildtype	Wildtype
C406	2020	Netherlands	Wildtype	MAT1-2	Clinical	4	Wildtype	Wildtype	Wildtype
C407	2020	Netherlands	Wildtype	MAT1-1	Clinical	5	Wildtype	Wildtype	Wildtype
C408	2020	Netherlands	Wildtype	MAT1-2	Clinical	5	Wildtype	Wildtype	Wildtype
C409	2020	Netherlands	Wildtype	MAT1-2	Clinical	5	Wildtype	Wildtype	Wildtype
C41	2014	UK	Wildtype	MAT1-2	Clinical	4	Wildtype	Wildtype	Wildtype	PRJEB27135
C410	2020	Netherlands	Wildtype	MAT1-2	Clinical	5	Wildtype	Wildtype	Wildtype
C411	2009	Japan	Wildtype	MAT1-2	Clinical	4	F219Y	Wildtype	Wildtype	PRJDB3064
C412	2009	Japan	Wildtype	MAT1-2	Clinical	4	F219Y	Wildtype	Wildtype	PRJDB3064
C413	2009	Japan	Wildtype	MAT1-2	Clinical	4	F219Y	Wildtype	Wildtype	PRJDB3064
C414	2009	Japan	Wildtype	MAT1-2	Clinical	4	F219Y	Wildtype	Wildtype	PRJDB3064
C415	2009	Japan	Wildtype	MAT1-2	Clinical	4	F219Y	Wildtype	Wildtype	PRJDB3064
C416	2009	Japan	Wildtype	MAT1-2	Clinical	4	Wildtype	Wildtype	Wildtype	PRJDB3064
C417	2009	Japan	Wildtype	MAT1-2	Clinical	4	Wildtype	Wildtype	Wildtype	PRJDB3064
C418	2011	Japan	P216L	MAT1-2	Clinical	4	Wildtype	Wildtype	Wildtype	PRJDB3064
C42	2013	Republic of Ireland	Wildtype	MAT1-1	Clinical	5	Wildtype	Wildtype	Wildtype	PRJEB27135
C420	2016	Denmark	TR120	MAT1-2	Clinical	4	Wildtype	Wildtype	Wildtype	From authors
C422	2021	UK	Wildtype	MAT-1-2	Clinical	4	Wildtype	Wildtype	Wildtype
C423	2021	UK	Wildtype	MAT-1-1	Clinical	4	Wildtype	Wildtype	Wildtype
C424	2021	UK	Wildtype	MAT-1-2	Clinical	5	Wildtype	Wildtype	Wildtype
C425	2021	UK	Wildtype	MAT-1-1	Clinical	1	Wildtype	Wildtype	Wildtype
C426	2021	Republic of Ireland	Wildtype	MAT-1-1	Clinical	5	Wildtype	Wildtype	Wildtype
C427	2021	Republic of Ireland	Wildtype	MAT-1-2	Clinical	3	Wildtype	Wildtype	Wildtype
C428	2021	Republic of Ireland	Wildtype	MAT-1-2	Clinical	5	Wildtype	Wildtype	Wildtype
C429	2021	Republic of Ireland	Wildtype	MAT-1-1	Clinical	3	Wildtype	Wildtype	Wildtype
C43	2011	Republic of Ireland	Wildtype	MAT1-1	Clinical	5	Wildtype	Wildtype	Wildtype	PRJEB27135
C430	2021	Republic of Ireland	Wildtype	MAT-1-1	Clinical	3	Wildtype	Wildtype	Wildtype
C431	2021	Republic of Ireland	Wildtype	MAT-1-1	Clinical	5	Wildtype	Wildtype	Wildtype
C432	2021	Republic of Ireland	Wildtype	MAT-1-2	Clinical	5	Wildtype	Wildtype	Wildtype
C433	2021	Republic of Ireland	Wildtype	MAT-1-2	Clinical	3	F219Y	Wildtype	Wildtype
C434	2021	Republic of Ireland	Wildtype	MAT-1-1	Clinical	3	Wildtype	Wildtype	Wildtype
C435	2021	Republic of Ireland	Wildtype	MAT-1-2	Clinical	5	Wildtype	Wildtype	Wildtype
C436	2021	Republic of Ireland	Wildtype	MAT-1-1	Clinical	5	Wildtype	Wildtype	Wildtype
C437	2021	Republic of Ireland	Wildtype	MAT-1-1	Clinical	5	Wildtype	Wildtype	Wildtype
C438	2021	Republic of Ireland	TR34/L98H	MAT-1-1	Clinical	2	Wildtype	Wildtype	Wildtype
C439	2021	Republic of Ireland	Wildtype	MAT-1-2	Clinical	5	Wildtype	Wildtype	Wildtype
C44	2011	Republic of Ireland	Wildtype	MAT1-2	Clinical	1	Wildtype	Wildtype	Wildtype	PRJEB27135
C440	2021	Republic of Ireland	Wildtype	MAT-1-2	Clinical	5	Wildtype	Wildtype	Wildtype
C441	2021	Republic of Ireland	TR34/L98H	MAT-1-1	Clinical	3	Wildtype	Wildtype	Wildtype
C442	2021	Republic of Ireland	TR34/L98H	MAT-1-1	Clinical	3	Wildtype	Wildtype	Wildtype
C443	2021	Republic of Ireland	Wildtype	MAT-1-1	Clinical	3	Wildtype	Wildtype	Wildtype
C444	2021	Republic of Ireland	TR34/L98H	MAT-1-1	Clinical	3	Wildtype	Wildtype	Wildtype
C445	2016	USA	TR34/L98H	MAT-1-1	Clinical	4	F219Y	Wildtype	Wildtype	PRJNA632561
C446	2016	USA	Wildtype	MAT-1-2	Clinical	1	Wildtype	Wildtype	Wildtype	PRJNA632561
C447	2015	USA	Wildtype	MAT-1-2	Clinical	4	Wildtype	Wildtype	Wildtype	PRJNA632561
C448	2015	USA	Wildtype	MAT-1-1	Clinical	4	Wildtype	Wildtype	Wildtype	PRJNA632561
C449	2015	USA	Wildtype	MAT-1-1	Clinical	4	Wildtype	Wildtype	Wildtype	PRJNA632561
C45	2011	Republic of Ireland	Wildtype	MAT1-2	Clinical	4	Wildtype	Wildtype	Wildtype	PRJEB27135
C450	2016	USA	Wildtype	MAT-1-2	Clinical	5	Wildtype	Wildtype	Wildtype	PRJNA632561
C451	2016	USA	Wildtype	MAT-1-2	Clinical	5	Wildtype	Wildtype	Wildtype	PRJNA632561
C452	2016	USA	Wildtype	MAT-1-1	Clinical	5	Wildtype	Wildtype	Wildtype	PRJNA632561
C453	2016	USA	Wildtype	MAT-1-2	Clinical	4	Wildtype	Wildtype	Wildtype	PRJNA632561
C454	2016	USA	Wildtype	MAT-1-2	Clinical	5	Wildtype	Wildtype	Wildtype	PRJNA632561
C455	2016	USA	Wildtype	MAT-1-1	Clinical	4	Wildtype	Wildtype	Wildtype	PRJNA632561
C456	2016	USA	Wildtype	MAT-1-1	Clinical	5	Wildtype	Wildtype	Wildtype	PRJNA632561
C457	2016	USA	Wildtype	MAT-1-1	Clinical	4	Wildtype	Wildtype	Wildtype	PRJNA632561
C458	2016	USA	Wildtype	MAT-1-1	Clinical	4	Wildtype	Wildtype	Wildtype	PRJNA632561
C459	2016	USA	Wildtype	MAT-1-1	Clinical	5	Wildtype	Wildtype	Wildtype	PRJNA632561
C46	2011	Republic of Ireland	Wildtype	MAT1-2	Clinical	4	Wildtype	Wildtype	Wildtype	PRJEB27135
C460	2015	USA	Wildtype	MAT-1-2	Clinical	4	Wildtype	Wildtype	Wildtype	PRJNA632561
C461	2016	USA	Wildtype	MAT-1-1	Clinical	4	Wildtype	Wildtype	Wildtype	PRJNA632561
C462	2016	USA	TR34/L98H	MAT-1-2	Clinical	3	F219Y	Wildtype	Wildtype	PRJNA632561
C463	2016	USA	Wildtype	MAT-1-2	Clinical	4	Wildtype	Wildtype	Wildtype	PRJNA632561
C464	2016	USA	Wildtype	MAT-1-2	Clinical	5	Wildtype	Wildtype	Wildtype	PRJNA632561
C465	2016	USA	Wildtype	MAT-1-2	Clinical	5	Wildtype	Wildtype	Wildtype	PRJNA632561
C466	2016	USA	Wildtype	MAT-1-1	Clinical	4	Wildtype	Wildtype	Wildtype	PRJNA632561
C467	2016	USA	Wildtype	MAT-1-2	Clinical	5	Wildtype	Wildtype	Wildtype	PRJNA632561
C468	2016	USA	Wildtype	MAT-1-2	Clinical	4	Wildtype	Wildtype	Wildtype	PRJNA632561
C469	2016	USA	Wildtype	MAT-1-1	Clinical	4	Wildtype	Wildtype	Wildtype	PRJNA632561
C47	2011	Republic of Ireland	Wildtype	MAT1-2	Clinical	1	Wildtype	Wildtype	Wildtype	PRJEB27135
C470	2016	USA	Wildtype	MAT-1-1	Clinical	4	Wildtype	Wildtype	Wildtype	PRJNA632561
C471	2015	USA	Wildtype	MAT-1-2	Clinical	4	Wildtype	Wildtype	Wildtype	PRJNA632561
C472	2016	USA	Wildtype	MAT-1-1	Clinical	4	Wildtype	Wildtype	Wildtype	PRJNA632561
C473	2016	USA	Wildtype	MAT-1-1	Clinical	5	Wildtype	Wildtype	Wildtype	PRJNA632561
C474	2016	USA	Wildtype	MAT-1-1	Clinical	4	Wildtype	Wildtype	Wildtype	PRJNA632561
C475	2016	USA	Wildtype	MAT-1-1	Clinical	5	Wildtype	Wildtype	Wildtype	PRJNA632561
C476	2015	USA	Wildtype	MAT-1-1	Clinical	4	Wildtype	Wildtype	Wildtype	PRJNA632561
C477	2016	USA	Wildtype	MAT-1-1	Clinical	4	Wildtype	Wildtype	Wildtype	PRJNA632561
C478	2016	USA	Wildtype	MAT-1-1	Clinical	5	Wildtype	Wildtype	Wildtype	PRJNA632561
C479	2016	USA	Wildtype	MAT-1-1	Clinical	5	Wildtype	Wildtype	Wildtype	PRJNA632561
C48	2011	Republic of Ireland	Wildtype	MAT1-2	Clinical	4	Wildtype	Wildtype	Wildtype	PRJEB27135
C480	2016	USA	Wildtype	MAT-1-1	Clinical	5	Wildtype	Wildtype	Wildtype	PRJNA632561
C481	2016	USA	Wildtype	MAT-1-1	Clinical	4	Wildtype	Wildtype	Wildtype	PRJNA632561
C482	2015	USA	Wildtype	MAT-1-2	Clinical	5	Wildtype	Wildtype	Wildtype	PRJNA632561
C483	2016	USA	Wildtype	MAT-1-1	Clinical	4	Wildtype	Wildtype	Wildtype	PRJNA632561
C484	2016	USA	Wildtype	MAT-1-2	Clinical	4	Wildtype	Wildtype	Wildtype	PRJNA632561
C485	2016	USA	Wildtype	MAT-1-1	Clinical	4	Wildtype	Wildtype	Wildtype	PRJNA632561
C486	2015	USA	Wildtype	MAT-1-1	Clinical	4	Wildtype	Wildtype	Wildtype	PRJNA632561
C487	2015	USA	Wildtype	MAT-1-2	Clinical	4	Wildtype	Wildtype	Wildtype	PRJNA632561
C488	2016	USA	Wildtype	MAT-1-1	Clinical	5	Wildtype	Wildtype	Wildtype	PRJNA632561
C489	2016	USA	Wildtype	MAT-1-2	Clinical	5	Wildtype	Wildtype	Wildtype	PRJNA632561
C49	2011	Republic of Ireland	Wildtype	MAT1-2	Clinical	4	Wildtype	Wildtype	Wildtype	PRJEB27135
C490	2015	USA	Wildtype	MAT-1-1	Clinical	4	Wildtype	Wildtype	Wildtype	PRJNA632561
C491	2016	USA	Wildtype	MAT-1-2	Clinical	5	Wildtype	Wildtype	Wildtype	PRJNA632561
C492	2016	USA	Wildtype	MAT-1-1	Clinical	5	Wildtype	Wildtype	Wildtype	PRJNA632561
C493	2015	USA	Wildtype	MAT-1-2	Clinical	5	Wildtype	Wildtype	Wildtype	PRJNA632561
C494	2016	USA	Wildtype	MAT-1-1	Clinical	5	Wildtype	Wildtype	Wildtype	PRJNA632561
C495	2016	USA	Wildtype	MAT-1-1	Clinical	5	Wildtype	Wildtype	Wildtype	PRJNA632561
C496	2015	USA	Wildtype	MAT-1-1	Clinical	5	Wildtype	Wildtype	Wildtype	PRJNA632561
C497	2015	USA	Wildtype	MAT-1-2	Clinical	5	Wildtype	Wildtype	Wildtype	PRJNA632561
C498	2015	USA	Wildtype	MAT-1-2	Clinical	5	Wildtype	Wildtype	Wildtype	PRJNA632561
C499	2015	USA	Wildtype	MAT-1-2	Clinical	4	Wildtype	Wildtype	Wildtype	PRJNA632561
C5±	2012	UK	Wildtype	MAT1-2	Clinical	4	Wildtype	Wildtype	Wildtype	PRJEB8623
C50	2011	Republic of Ireland	Wildtype	MAT1-2	Clinical	1	Wildtype	Wildtype	Wildtype	PRJEB27135
C500	2015	USA	Wildtype	MAT-1-1	Clinical	4	Wildtype	Wildtype	Wildtype	PRJNA632561
C501	2015	USA	Wildtype	MAT-1-1	Clinical	4	Wildtype	Wildtype	Wildtype	PRJNA632561
C502	2015	USA	Wildtype	MAT-1-1	Clinical	4	Wildtype	Wildtype	Wildtype	PRJNA632561
C503	2015	USA	Wildtype	MAT-1-1	Clinical	5	Wildtype	Wildtype	Wildtype	PRJNA632561
C504	2015	USA	Wildtype	MAT-1-2	Clinical	4	Wildtype	Wildtype	Wildtype	PRJNA632561
C505	2015	USA	Wildtype	MAT-1-2	Clinical	1	Wildtype	Wildtype	Wildtype	PRJNA632561
C506	2015	USA	Wildtype	MAT-1-2	Clinical	5	Wildtype	Wildtype	Wildtype	PRJNA632561
C507	2015	USA	Wildtype	MAT-1-1	Clinical	5	Wildtype	Wildtype	Wildtype	PRJNA632561
C508	2015	USA	Wildtype	MAT-1-2	Clinical	5	Wildtype	Wildtype	Wildtype	PRJNA632561
C509	2016	USA	Wildtype	MAT-1-2	Clinical	4	Wildtype	Wildtype	Wildtype	PRJNA632561
C51	2012	Republic of Ireland	Wildtype	MAT1-1	Clinical	4	Wildtype	Wildtype	Wildtype	PRJEB27135
C510	2016	USA	Wildtype	MAT-1-2	Clinical	4	Wildtype	Wildtype	Wildtype	PRJNA632561
C511	2015	USA	Wildtype	MAT-1-1	Clinical	4	Wildtype	Wildtype	Wildtype	PRJNA632561
C512	2015	USA	Wildtype	MAT-1-2	Clinical	4	Wildtype	Wildtype	Wildtype	PRJNA632561
C513	2014	USA	Wildtype	MAT-1-1	Clinical	1	Wildtype	Wildtype	Wildtype	PRJNA632561
C514	2014	USA	Wildtype	MAT-1-2	Clinical	5	Wildtype	Wildtype	Wildtype	PRJNA632561
C515	2015	USA	Wildtype	MAT-1-2	Clinical	4	Wildtype	Wildtype	Wildtype	PRJNA632561
C516	2015	USA	Wildtype	MAT-1-1	Clinical	1	Wildtype	Wildtype	Wildtype	PRJNA632561
C517	2015	USA	Wildtype	MAT-1-1	Clinical	5	Wildtype	Wildtype	Wildtype	PRJNA632561
C518	2015	USA	Wildtype	MAT-1-2	Clinical	5	Wildtype	Wildtype	Wildtype	PRJNA632561
C519	2015	USA	Wildtype	MAT-1-1	Clinical	4	Wildtype	Wildtype	Wildtype	PRJNA632561
C52	2012	Republic of Ireland	Wildtype	MAT1-1	Clinical	4	Wildtype	Wildtype	Wildtype	PRJEB27135
C520	2015	USA	Wildtype	MAT-1-1	Clinical	5	Wildtype	Wildtype	Wildtype	PRJNA632561
C521	2015	USA	Wildtype	MAT-1-2	Clinical	5	Wildtype	Wildtype	Wildtype	PRJNA632561
C522	2015	USA	Wildtype	MAT-1-1	Clinical	4	Wildtype	Wildtype	Wildtype	PRJNA632561
C523	2015	USA	Wildtype	MAT-1-2	Clinical	5	Wildtype	Wildtype	Wildtype	PRJNA632561
C524	2015	USA	Wildtype	MAT-1-1	Clinical	4	Wildtype	Wildtype	Wildtype	PRJNA632561
C525	2015	USA	Wildtype	MAT-1-1	Clinical	4	Wildtype	Wildtype	Wildtype	PRJNA632561
C526	2015	USA	Wildtype	MAT-1-1	Clinical	4	Wildtype	Wildtype	Wildtype	PRJNA632561
C527	2015	USA	Wildtype	MAT-1-1	Clinical	4	Wildtype	Wildtype	Wildtype	PRJNA632561
C528	2014	USA	Wildtype	MAT-1-1	Clinical	4	Wildtype	Wildtype	Wildtype	PRJNA632561
C529	2015	USA	TR34	MAT-1-2	Clinical	5	Wildtype	Wildtype	Wildtype	PRJNA632561
C53	2013	Republic of Ireland	Wildtype	MAT1-2	Clinical	4	Wildtype	Wildtype	Wildtype	PRJEB27135
C530	2015	USA	Wildtype	MAT-1-1	Clinical	4	Wildtype	Wildtype	Wildtype	PRJNA632561
C531	2015	USA	Wildtype	MAT-1-1	Clinical	4	Wildtype	Wildtype	Wildtype	PRJNA632561
C532	2015	USA	Wildtype	MAT-1-1	Clinical	4	Wildtype	Wildtype	Wildtype	PRJNA632561
C533	2015	USA	Wildtype	MAT-1-2	Clinical	4	Wildtype	Wildtype	Wildtype	PRJNA632561
C534	2015	USA	Wildtype	MAT-1-2	Clinical	4	Wildtype	Wildtype	Wildtype	PRJNA632561
C535	2015	USA	Wildtype	MAT-1-2	Clinical	4	Wildtype	Wildtype	Wildtype	PRJNA632561
C536	2015	USA	Wildtype	MAT-1-1	Clinical	5	Wildtype	Wildtype	Wildtype	PRJNA632561
C537	2013	USA	Wildtype	MAT-1-1	Clinical	4	Wildtype	Wildtype	Wildtype	PRJNA632561
C538	2013	USA	Wildtype	MAT-1-1	Clinical	4	Wildtype	Wildtype	Wildtype	PRJNA632561
C539		USA	Wildtype	MAT-1-2	Clinical	3	Wildtype	Wildtype	Wildtype	PRJNA632561
C54	2012	Republic of Ireland	Wildtype	MAT1-2	Clinical	4	Wildtype	Wildtype	Wildtype	PRJEB27135
C540		USA	Wildtype	MAT-1-2	Clinical	1	Wildtype	Wildtype	Wildtype	PRJNA632561
C541	2014	USA	Wildtype	MAT-1-1	Clinical	4	Wildtype	Wildtype	Wildtype	PRJNA632561
C542	2017	USA	Wildtype	MAT-1-1	Clinical	4	Wildtype	Wildtype	Wildtype	PRJNA632561
C543	2017	USA	Wildtype	MAT-1-1	Clinical	4	Wildtype	Wildtype	Wildtype	PRJNA632561
C544	2017	USA	Wildtype	MAT-1-2	Clinical	5	Wildtype	Wildtype	Wildtype	PRJNA632561
C545	2015	USA	Wildtype	MAT-1-1	Clinical	5	Wildtype	Wildtype	Wildtype	PRJNA632561
C546	2017	USA	Wildtype	MAT-1-1	Clinical	5	Wildtype	Wildtype	Wildtype	PRJNA632561
C547	2017	USA	Wildtype	MAT-1-1	Clinical	4	Wildtype	Wildtype	Wildtype	PRJNA632561
C548	2017	USA	TR34/L98H	MAT-1-2	Clinical	3	Wildtype	G143A	Wildtype	PRJNA632561
C549	2016	USA	TR34/L98H	MAT-1-2	Clinical	3	Wildtype	G143A	Wildtype	PRJNA632561
C55	2012	Republic of Ireland	Wildtype	MAT1-2	Clinical	5	Wildtype	Wildtype	Wildtype	PRJEB27135
C550	2017	USA	TR34/L98H	MAT-1-2	Clinical	3	F219Y	Wildtype	Wildtype	PRJNA632561
C551	2016	USA	Wildtype	MAT-1-2	Clinical	4	Wildtype	Wildtype	Wildtype	PRJNA632561
C552	2016	USA	Wildtype	MAT-1-2	Clinical	5	Wildtype	Wildtype	Wildtype	PRJNA632561
C553	2016	USA	Wildtype	MAT-1-1	Clinical	4	Wildtype	Wildtype	Wildtype	PRJNA632561
C554	2016	USA	Wildtype	MAT-1-2	Clinical	5	Wildtype	Wildtype	Wildtype	PRJNA632561
C555	2016	USA	Wildtype	MAT-1-2	Clinical	4	Wildtype	Wildtype	Wildtype	PRJNA632561
C556	2015	USA	Wildtype	MAT-1-1	Clinical	4	Wildtype	Wildtype	Wildtype	PRJNA632561
C557	2016	USA	Wildtype	MAT-1-1	Clinical	3	Wildtype	Wildtype	Wildtype	PRJNA632561
C558	2016	USA	Wildtype	MAT-1-2	Clinical	5	Wildtype	Wildtype	Wildtype	PRJNA632561
C559	2016	USA	Wildtype	MAT-1-2	Clinical	4	Wildtype	Wildtype	Wildtype	PRJNA632561
C56	2012	Republic of Ireland	Wildtype	MAT1-2	Clinical	5	Wildtype	Wildtype	Wildtype	PRJEB27135
C560	2016	USA	Wildtype	MAT-1-2	Clinical	5	Wildtype	Wildtype	Wildtype	PRJNA632561
C561	2016	USA	Wildtype	MAT-1-1	Clinical	4	Wildtype	Wildtype	Wildtype	PRJNA632561
C562	2016	USA	Wildtype	MAT-1-1	Clinical	4	Wildtype	Wildtype	Wildtype	PRJNA632561
C563	2016	USA	Wildtype	MAT-1-1	Clinical	4	Wildtype	Wildtype	Wildtype	PRJNA632561
C564	2016	USA	Wildtype	MAT-1-1	Clinical	4	Wildtype	Wildtype	Wildtype	PRJNA632561
C565	2016	USA	Wildtype	MAT-1-2	Clinical	4	Wildtype	Wildtype	Wildtype	PRJNA632561
C566	2016	USA	Wildtype	MAT-1-1	Clinical	4	Wildtype	Wildtype	Wildtype	PRJNA632561
C567	2015	USA	Wildtype	MAT-1-1	Clinical	4	Wildtype	Wildtype	Wildtype	PRJNA632561
C568	2016	USA	Wildtype	MAT-1-1	Clinical	5	Wildtype	Wildtype	Wildtype	PRJNA632561
C569	2016	USA	Wildtype	MAT-1-1	Clinical	4	Wildtype	Wildtype	Wildtype	PRJNA632561
C57	2013	Republic of Ireland	Wildtype	MAT1-2	Clinical	5	Wildtype	Wildtype	Wildtype	PRJEB27135
C570	2016	USA	Wildtype	MAT-1-1	Clinical	4	Wildtype	Wildtype	Wildtype	PRJNA632561
C571	2016	USA	Wildtype	MAT-1-1	Clinical	5	Wildtype	Wildtype	Wildtype	PRJNA632561
C572	2016	USA	Wildtype	MAT-1-1	Clinical	4	Wildtype	Wildtype	Wildtype	PRJNA632561
C573	2016	USA	Wildtype	MAT-1-1	Clinical	4	Wildtype	Wildtype	Wildtype	PRJNA632561
C574	2016	USA	Wildtype	MAT-1-2	Clinical	5	Wildtype	Wildtype	Wildtype	PRJNA632561
C575	2016	USA	Wildtype	MAT-1-1	Clinical	1	Wildtype	Wildtype	Wildtype	PRJNA632561
C576	2016	USA	Wildtype	MAT-1-1	Clinical	3	Wildtype	Wildtype	Wildtype	PRJNA632561
C577	2016	USA	Wildtype	MAT-1-2	Clinical	4	Wildtype	Wildtype	Wildtype	PRJNA632561
C578	2015	USA	Wildtype	MAT-1-2	Clinical	4	Wildtype	Wildtype	Wildtype	PRJNA632561
C579	2016	USA	Wildtype	MAT-1-1	Clinical	4	Wildtype	Wildtype	Wildtype	PRJNA632561
C58	2010	Republic of Ireland	Wildtype	MAT1-1	Clinical	5	Wildtype	Wildtype	Wildtype	PRJEB27135
C580	2016	USA	Wildtype	MAT-1-1	Clinical	5	Wildtype	Wildtype	Wildtype	PRJNA632561
C581	2016	USA	Wildtype	MAT-1-1	Clinical	4	Wildtype	Wildtype	Wildtype	PRJNA632561
C582	2016	USA	Wildtype	MAT-1-2	Clinical	5	Wildtype	Wildtype	Wildtype	PRJNA632561
C583	2016	USA	Wildtype	MAT-1-1	Clinical	5	Wildtype	Wildtype	Wildtype	PRJNA632561
C584	2016	USA	Wildtype	MAT-1-1	Clinical	1	Wildtype	Wildtype	Wildtype	PRJNA632561
C585	2016	USA	Wildtype	MAT-1-1	Clinical	4	Wildtype	Wildtype	Wildtype	PRJNA632561
C586	2016	USA	Wildtype	MAT-1-2	Clinical	4	Wildtype	Wildtype	Wildtype	PRJNA632561
C587	2016	USA	Wildtype	MAT-1-2	Clinical	4	Wildtype	Wildtype	Wildtype	PRJNA632561
C588	2016	USA	Wildtype	MAT-1-1	Clinical	4	Wildtype	Wildtype	Wildtype	PRJNA632561
C589	2015	USA	Wildtype	MAT-1-2	Clinical	4	Wildtype	Wildtype	Wildtype	PRJNA632561
C59	2010	Republic of Ireland	Wildtype	MAT1-1	Clinical	5	Wildtype	Wildtype	Wildtype	PRJEB27135
C590	2016	USA	Wildtype	MAT-1-2	Clinical	5	Wildtype	Wildtype	Wildtype	PRJNA632561
C591	2016	USA	Wildtype	MAT-1-1	Clinical	5	Wildtype	Wildtype	Wildtype	PRJNA632561
C592	2016	USA	Wildtype	MAT-1-2	Clinical	4	Wildtype	Wildtype	Wildtype	PRJNA632561
C593	2016	USA	Wildtype	MAT-1-2	Clinical	5	Wildtype	Wildtype	Wildtype	PRJNA632561
C594	2016	USA	Wildtype	MAT-1-1	Clinical	4	Wildtype	Wildtype	Wildtype	PRJNA632561
C595	2016	USA	Wildtype	MAT-1-1	Clinical	4	Wildtype	Wildtype	Wildtype	PRJNA632561
C596	2016	USA	Wildtype	MAT-1-2	Clinical	4	Wildtype	Wildtype	Wildtype	PRJNA632561
C597	2016	USA	Wildtype	MAT-1-2	Clinical	4	Wildtype	Wildtype	Wildtype	PRJNA632561
C598	2016	USA	Wildtype	MAT-1-2	Clinical	5	Wildtype	Wildtype	Wildtype	PRJNA632561
C599	2016	USA	Wildtype	MAT-1-1	Clinical	5	Wildtype	Wildtype	Wildtype	PRJNA632561
C6	2012	UK	Wildtype	MAT1-1	Clinical	3	Wildtype	Wildtype	Wildtype	PRJEB8623
C60	2012	Republic of Ireland	Wildtype	MAT1-1	Clinical	3	Wildtype	Wildtype	Wildtype	PRJEB27135
C600	2015	USA	Wildtype	MAT-1-2	Clinical	4	Wildtype	Wildtype	Wildtype	PRJNA632561
C601	2016	USA	Wildtype	MAT-1-2	Clinical	4	Wildtype	Wildtype	Wildtype	PRJNA632561
C602	2016	USA	Wildtype	MAT-1-2	Clinical	4	Wildtype	Wildtype	Wildtype	PRJNA632561
C603	2016	USA	Wildtype	MAT-1-2	Clinical	4	Wildtype	Wildtype	Wildtype	PRJNA632561
C604	2016	USA	Wildtype	MAT-1-1	Clinical	4	Wildtype	Wildtype	Wildtype	PRJNA632561
C605	2016	USA	Wildtype	MAT-1-1	Clinical	5	Wildtype	Wildtype	Wildtype	PRJNA632561
C606	2016	USA	Wildtype	MAT-1-1	Clinical	5	Wildtype	Wildtype	Wildtype	PRJNA632561
C607	2016	USA	Wildtype	MAT-1-1	Clinical	4	Wildtype	Wildtype	Wildtype	PRJNA632561
C608	2016	USA	Wildtype	MAT-1-2	Clinical	5	Wildtype	Wildtype	Wildtype	PRJNA632561
C609	2016	USA	Wildtype	MAT-1-2	Clinical	4	Wildtype	Wildtype	Wildtype	PRJNA632561
C61	2013	Republic of Ireland	Wildtype	MAT1-1	Clinical	3	Wildtype	Wildtype	Wildtype	PRJEB27135
C610	2015	USA	Wildtype	MAT-1-2	Clinical	4	Wildtype	Wildtype	Wildtype	PRJNA632561
C611	2021	Republic of Ireland	Wildtype	MAT-1-2	Environmental	5	Wildtype	Wildtype	Wildtype
C612	2021	Republic of Ireland	Wildtype	MAT-1-2	Environmental	4	Wildtype	Wildtype	Wildtype
C62	2013	Republic of Ireland	Wildtype	MAT1-1	Clinical	3	Wildtype	Wildtype	Wildtype	PRJEB27135
C63	2013	Republic of Ireland	Wildtype	MAT1-1	Clinical	3	Wildtype	Wildtype	Wildtype	PRJEB27135
C64	2013	Republic of Ireland	Wildtype	MAT1-1	Clinical	3	Wildtype	Wildtype	Wildtype	PRJEB27135
C65	2013	Republic of Ireland	Wildtype	MAT1-1	Clinical	3	Wildtype	Wildtype	Wildtype	PRJEB27135
C66	2013	Republic of Ireland	Wildtype	MAT1-1	Clinical	3	Wildtype	Wildtype	Wildtype	PRJEB27135
C67	2010	Republic of Ireland	Wildtype	MAT1-1	Clinical	3	Wildtype	Wildtype	Wildtype	PRJEB27135
C68	2010	Republic of Ireland	Wildtype	MAT1-1	Clinical	3	Wildtype	Wildtype	Wildtype	PRJEB27135
C69	2013	Republic of Ireland	TR34/L98H	MAT1-2	Clinical	2	Wildtype	Wildtype	Wildtype	PRJEB27135
C7	2003	Netherlands	TR34/L98H	MAT1-1	Clinical	3	F219Y	Wildtype	Wildtype	PRJEB8623
C70		Republic of Ireland	TR34/L98H	MAT1-2	Clinical	2	Wildtype	Wildtype	Wildtype	PRJEB27135
C71		Republic of Ireland	TR34/L98H	MAT1-2	Clinical	2	Wildtype	Wildtype	Wildtype	PRJEB27135
C72	2011	Republic of Ireland	Wildtype	MAT1-1	Clinical	5	Wildtype	Wildtype	Wildtype	PRJEB27135
C73	2011	Republic of Ireland	Wildtype	MAT1-1	Clinical	5	Wildtype	Wildtype	Wildtype	PRJEB27135
C74	2011	Republic of Ireland	Wildtype	MAT1-2	Clinical	5	Wildtype	Wildtype	Wildtype	PRJEB27135
C75	2011	Republic of Ireland	Wildtype	MAT1-2	Clinical	5	Wildtype	Wildtype	Wildtype	PRJEB27135
C76		Republic of Ireland	Wildtype	MAT1-1	Clinical	3	Wildtype	Wildtype	Wildtype	PRJEB27135
C77	2015	Republic of Ireland	Wildtype	MAT1-1	Clinical	4	Wildtype	Wildtype	Wildtype	PRJEB27135
C78	2015	Republic of Ireland	TR34/L98H	MAT1-2	Clinical	3	Wildtype	Wildtype	Wildtype	PRJEB27135
C79	2015	Republic of Ireland	TR34/L98H	MAT1-2	Clinical	2	Wildtype	Wildtype	Wildtype	PRJEB27135
C8	2005	Netherlands	TR34/L98H	MAT1-2	Clinical	3	F219Y	Wildtype	Wildtype	PRJEB8623
C80	2015	Republic of Ireland	TR34/L98H	MAT1-2	Clinical	2	Wildtype	Wildtype	Wildtype	PRJEB27135
C81	2013	UK	TR34/L98H	MAT1-1	Clinical	3	F219Y	Wildtype	Wildtype	PRJEB27135
C82 ±	2014	UK	TR34/L98H	MAT1-2	Clinical	2	Wildtype	Wildtype	Wildtype	PRJEB27135
C84	1997	USA	G54E	MAT1-2	Clinical	5	Wildtype	Wildtype	Wildtype
C85±	2015	UK	TR34/L98H	MAT1-2	Clinical	2	Wildtype	Wildtype	Wildtype	PRJEB27135
C86	2015	UK	TR34/L98H	MAT1-1	Clinical	3	Wildtype	Wildtype	Wildtype	PRJEB27135
C87±	2015	UK	TR34/L98H	MAT1-2	Clinical	3	Wildtype	Wildtype	Wildtype	PRJEB27135
C88 ±	2014	UK	TR34/L98H	MAT1-2	Clinical	3	F219Y	Wildtype	Wildtype	PRJEB27135
C89 ±	2015	UK	TR34/L98H	MAT1-2	Clinical	3	Wildtype	Wildtype	Wildtype	PRJEB27135
C9	2004	Netherlands	TR34/L98H	MAT1-1	Clinical	3	F219Y	Wildtype	Wildtype	PRJEB8623
C90	2015	UK	TR34/L98H	MAT1-2	Clinical	2	Wildtype	Wildtype	Wildtype	PRJEB27135
C91	2015	UK	TR34/L98H	MAT1-1	Clinical	2	Wildtype	Wildtype	Wildtype	PRJEB27135
C92 ±	2015	UK	TR34/L98H	MAT1-2	Clinical	2	Wildtype	Wildtype	Wildtype	PRJEB27135
C93	2016	UK	TR34/L98H	MAT1-1	Clinical	3	Wildtype	Wildtype	Wildtype	PRJEB27135
C94 ±	2016	UK	TR34/L98H	MAT1-2	Clinical	2	Wildtype	Wildtype	Wildtype	PRJEB27135
C95	2016	UK	Wildtype	MAT1-1	Clinical	4	Wildtype	Wildtype	Wildtype	PRJEB27135
C96	2015	UK	TR34/L98H	MAT1-1	Clinical	3	Wildtype	Wildtype	Wildtype	PRJEB27135
C97	2017	UK	TR34/L98H	MAT1-1	Clinical	2	Wildtype	Wildtype	Wildtype	PRJEB27135
C98	2016	UK	Wildtype	MAT-1-1	Clinical	1	Wildtype	Wildtype	Wildtype
C99±	2016	UK	Wildtype	MAT1-2	Clinical	5	Wildtype	Wildtype	Wildtype	PRJEB27135
E1	2008	Netherlands	TR34/L98H	MAT1-1	Environmental	3	Wildtype	Wildtype	Wildtype	PRJEB8623
E10	2015	UK	TR34/L98H	MAT1-2	Environmental	3	F219Y	Wildtype	Wildtype	PRJEB27135
E100*	2002	South Africa	Wildtype	MAT1-2	Environmental	4	Wildtype	Wildtype	Wildtype
E101*	1997	India	Wildtype	MAT1-2	Environmental	4	Wildtype	Wildtype	Wildtype
E102*	1997	India	Wildtype	MAT1-1	Environmental	3	Wildtype	Wildtype	Wildtype
E103*	1997	India	Wildtype	MAT1-2	Environmental	3	Wildtype	Wildtype	Wildtype
E104*	1997	India	Wildtype	MAT1-1	Environmental	4	Wildtype	Wildtype	Wildtype
E105*	1988	Australia	Wildtype	MAT1-2	Environmental	4	Wildtype	Wildtype	Wildtype
E106*	1988	Australia	Wildtype	MAT1-1	Environmental	4	Wildtype	Wildtype	Wildtype
E107*±	2012	UK	Wildtype	MAT1-2	Environmental	3	Wildtype	Wildtype	Wildtype	PRJEB27135
E108*±	2001	South Africa	Wildtype	MAT1-1	Environmental	3	Wildtype	Wildtype	Wildtype
E109*±	2001	South Africa	Wildtype	MAT1-1	Environmental	4	Wildtype	Wildtype	Wildtype
E11±	2015	UK	TR34/L98H	MAT1-2	Environmental	2	Wildtype	Wildtype	Wildtype	PRJEB27135
E110*	2001	South Africa	Wildtype	MAT1-2	Environmental	3	Wildtype	Wildtype	Wildtype
E111*±	2002	Vietnam	Wildtype	MAT1-1	Environmental	4	Wildtype	Wildtype	Wildtype
E112*	2002	Vietnam	Wildtype	MAT1-1	Environmental	3	Wildtype	Wildtype	Wildtype
E113*	2004	China	Wildtype	MAT1-1	Environmental	4	Wildtype	Wildtype	Wildtype
E114*	2004	China	Wildtype	MAT1-2	Environmental	3	Wildtype	Wildtype	Wildtype
E115*	2004	China	Wildtype	MAT1-2	Environmental	4	Wildtype	Wildtype	Wildtype
E116*	2004	China	Wildtype	MAT1-2	Environmental	4	Wildtype	Wildtype	Wildtype
E117*		Zambia	Wildtype	MAT1-2	Environmental	3	Wildtype	Wildtype	Wildtype
E118*	1991	Brazil	Wildtype	MAT1-2	Environmental	4	Wildtype	Wildtype	Wildtype
E119*	1991	Brazil	Wildtype	MAT1-2	Environmental	1	Wildtype	Wildtype	Wildtype
E12±	2015	UK	Wildtype	MAT1-2	Environmental	3	Wildtype	G143A	H270Y	PRJEB27135
E120*	1997	USA	Wildtype	MAT1-1	Environmental	4	Wildtype	Wildtype	Wildtype
E121*	2002	Zimbabwe	Wildtype	MAT1-2	Environmental	4	Wildtype	Wildtype	Wildtype
E122*	1991	Sri Lanka	Wildtype	MAT1-1	Environmental	4	Wildtype	Wildtype	Wildtype
E123*	2002	Zimbabwe	Wildtype	MAT1-2	Environmental	4	Wildtype	Wildtype	Wildtype
E124*	1991	Sri Lanka	Wildtype	MAT-1-1	Environmental	1	Wildtype	Wildtype	Wildtype
E125*		USA	Wildtype	MAT1-1	Environmental	1	Wildtype	Wildtype	Wildtype
E126*±	2002	Mauritius	Wildtype	MAT1-1	Environmental	1	Wildtype	Wildtype	Wildtype
E127*	2005	Mexico	Wildtype	MAT1-2	Environmental	3	Wildtype	Wildtype	Wildtype
E128*±	2005	Mexico	Wildtype	MAT1-1	Environmental	3	Wildtype	Wildtype	Wildtype
E129*±	1999	USA	Wildtype	MAT1-1	Environmental	4	Wildtype	Wildtype	Wildtype
E13	2015	UK	TR34/L98H	MAT1-2	Environmental	2	Wildtype	Wildtype	Wildtype	PRJEB27135
E130*±	1999	Cuba	Wildtype	MAT1-1	Environmental	1	Wildtype	Wildtype	Wildtype
E131*	1998	India	Wildtype	MAT1-2	Environmental	3	Wildtype	Wildtype	Wildtype
E132*	1998	India	Wildtype	MAT1-2	Environmental	4	Wildtype	Wildtype	Wildtype
E133±	2012	UK	Wildtype	MAT1-2	Environmental	4	Wildtype	Wildtype	Wildtype	PRJEB27135
E134*	1999	USA	Wildtype	MAT1-2	Environmental	4	Wildtype	Wildtype	Wildtype
E135*	1999	Cuba	Wildtype	MAT1-1	Environmental	1	Wildtype	Wildtype	Wildtype
E136*±	2010	UK	Wildtype	MAT1-2	Environmental	4	Wildtype	Wildtype	Wildtype	PRJEB27135
E137±		USA	Wildtype	MAT1-2	Environmental	4	Wildtype	Wildtype	Wildtype
E138		USA	Wildtype	MAT1-1	Environmental	4	Wildtype	Wildtype	Wildtype
E139		USA	Wildtype	MAT1-1	Environmental	4	Wildtype	Wildtype	Wildtype
E14±	2015	UK	TR34/L98H	MAT1-2	Environmental	1	F219Y	Wildtype	Wildtype	PRJEB27135
E140 ±		USA	Wildtype	MAT1-2	Environmental	4	Wildtype	Wildtype	Wildtype
E141±		USA	Wildtype	MAT1-2	Environmental	4	Wildtype	Wildtype	Wildtype
E142±		USA	Wildtype	MAT1-1	Environmental	5	Wildtype	Wildtype	Wildtype
E143 ±	2009	USA	Wildtype	MAT1-2	Environmental	5	Wildtype	Wildtype	Wildtype
E144±	2009	USA	Wildtype	MAT1-1	Environmental	5	Wildtype	Wildtype	Wildtype
E145±		USA	TR34/L98H	MAT1-2	Environmental	4	F219Y	G143A	Wildtype
E146±		USA	Wildtype	MAT1-2	Environmental	4	Wildtype	Wildtype	Wildtype
E147±		USA	Wildtype	MAT1-2	Environmental	4	Wildtype	Wildtype	Wildtype
E148±		USA	TR34/L98H	MAT1-2	Environmental	4	F219Y	G143A	Wildtype
E149		USA	TR34/L98H	MAT1-2	Environmental	4	F219Y	G143A	Wildtype
E15±	2015	UK	TR34/L98H	MAT1-2	Environmental	3	Wildtype	G143A	Wildtype	PRJEB27135
E150		Australia	Wildtype	MAT1-1	Environmental	1	Wildtype	Wildtype	Wildtype
E151		Australia	Wildtype	MAT1-1	Environmental	3	Wildtype	Wildtype	Wildtype
E152		Australia	Wildtype	MAT1-2	Environmental	4	Wildtype	Wildtype	Wildtype
E153		Australia	Wildtype	MAT1-2	Environmental	4	Wildtype	Wildtype	Wildtype
E154		Australia	Wildtype	MAT1-1	Environmental	5	Wildtype	Wildtype	Wildtype
E155		Australia	Wildtype	MAT1-2	Environmental	4	Wildtype	Wildtype	Wildtype
E156		Australia	Wildtype	MAT1-1	Environmental	5	Wildtype	Wildtype	Wildtype
E157		Australia	Wildtype	MAT1-2	Environmental	4	Wildtype	Wildtype	Wildtype
E158		Australia	Wildtype	MAT1-1	Environmental	1	Wildtype	Wildtype	Wildtype
E159		Australia	Wildtype	MAT1-2	Environmental	4	Wildtype	Wildtype	Wildtype
E16 ±	2015	UK	TR34/L98H	MAT1-2	Environmental	2	Wildtype	Wildtype	Wildtype	PRJEB27135
E160±	2013	India	Wildtype	MAT1-2	Environmental	3	Wildtype	Wildtype	Wildtype
E161	2013	India	Wildtype	MAT1-2	Environmental	4	Wildtype	Wildtype	Wildtype
E162	2012	India	Wildtype	MAT1-2	Environmental	3	Wildtype	Wildtype	Wildtype
E163±	2013	India	Wildtype	MAT1-2	Environmental	3	Wildtype	Wildtype	Wildtype
E164	2012	India	Wildtype	MAT1-2	Environmental	4	Wildtype	Wildtype	Wildtype
E165	2012	India	Wildtype	MAT1-2	Environmental	4	Wildtype	Wildtype	Wildtype
E166	2013	India	Wildtype	MAT1-2	Environmental	4	Wildtype	Wildtype	Wildtype
E167	2013	India	Wildtype	MAT1-2	Environmental	4	Wildtype	Wildtype	Wildtype
E168	2012	Germany	TR46/Y121F/T289A	MAT1-2	Environmental	3	F219Y	G143A	Wildtype
E169 ±	2012	Germany	TR34/L98H	MAT1-2	Environmental	2	Wildtype	Wildtype	Wildtype
E17	2015	UK	TR34/L98H	MAT1-2	Environmental	3	F219Y	G143A	H270R	PRJEB27135
E170	2012	Germany	TR34/L98H	MAT1-1	Environmental	3	Wildtype	Wildtype	Wildtype
E171	2012	Germany	TR46/Y121F/T289A	MAT1-2	Environmental	3	F219Y	G143A	Wildtype
E172	2012	Germany	Wildtype	MAT1-2	Environmental	4	Wildtype	Wildtype	Wildtype
E173	2012	Germany	TR46/Y121F/T289A	MAT1-2	Environmental	3	F219Y	G143A	Wildtype
E174	2015	Tanzania	Wildtype	MAT1-2	Environmental	3	F219Y	Wildtype	Wildtype
E175	2015	Tanzania	Wildtype	MAT1-2	Environmental	4	Wildtype	Wildtype	Wildtype
E176	2015	Thailand	TR34/L98H	MAT1-2	Environmental	1	Wildtype	Wildtype	Wildtype
E177	2015	Thailand	TR34/L98H	MAT1-2	Environmental	2	Wildtype	Wildtype	Wildtype
E178	2015	Thailand	TR34/L98H	MAT1-1	Environmental	3	Wildtype	Wildtype	Wildtype
E179	2015	Thailand	TR34/L98H	MAT1-2	Environmental	2	Wildtype	Wildtype	Wildtype
E18	2015	UK	TR34/L98H	MAT1-2	Environmental	3	Wildtype	Wildtype	Wildtype	PRJEB27135
E180±	2015	Taiwan	TR34/L98H	MAT1-2	Environmental	4	Wildtype	G143A	Wildtype
E181 ±	2016	Taiwan	TR34/L98H	MAT1-2	Environmental	3	Wildtype	Wildtype	Wildtype
E182	2016	Taiwan	TR34/L98H	MAT1-1	Environmental	3	Wildtype	Wildtype	Wildtype
E183	2015	Taiwan	TR34/L98H	MAT1-2	Environmental	3	Wildtype	Wildtype	Wildtype
E184	2015	Taiwan	Wildtype	MAT1-2	Environmental	1	Wildtype	Wildtype	Wildtype
E185 ±	2015	Taiwan	TR34/L98H	MAT1-2	Environmental	1	Wildtype	Wildtype	Wildtype
E186±	2015	Taiwan	Wildtype	MAT1-1	Environmental	4	Wildtype	Wildtype	Wildtype
E187±	2015	Taiwan	Wildtype	MAT1-2	Environmental	1	Wildtype	Wildtype	Wildtype
E188	2016	Taiwan	TR34/L98H	MAT1-2	Environmental	4	Wildtype	Wildtype	Wildtype
E189	2015	Tanzania	Wildtype	MAT-1-1	Environmental	1	Wildtype	Wildtype	Wildtype
E19±	2015	UK	TR34/L98H	MAT1-2	Environmental	3	Wildtype	Wildtype	Wildtype	PRJEB27135
E190	2017	UK	TR34/L98H	MAT1-1	Environmental	3	Wildtype	Wildtype	Wildtype	PRJEB27135
E191	2017	UK	TR34/L98H	MAT1-2	Environmental	3	F219Y	Wildtype	Wildtype	PRJEB27135
E192	2017	UK	Wildtype	MAT1-2	Environmental	5	Wildtype	Wildtype	Wildtype	PRJEB27135
E193	2017	UK	Wildtype	MAT1-1	Environmental	5	Wildtype	Wildtype	Wildtype	PRJEB27135
E194	2017	UK	Wildtype	MAT1-2	Environmental	5	Wildtype	Wildtype	Wildtype	PRJEB27135
E195 ±	2017	UK	Wildtype	MAT1-2	Environmental	5	Wildtype	Wildtype	Wildtype	PRJEB27135
E196	2017	Colombia	TR34/L98H	MAT1-1	Environmental	3	F219Y	Wildtype	Wildtype
E197±	2017	Colombia	TR34/L98H	MAT1-2	Environmental	3	F219Y	G143A	H270R
E198	2017	Colombia	TR46/Y121F/T289A	MAT1-1	Environmental	4	F219Y	G143A	H270Y
E199	2017	Colombia	TR46/Y121F/T289A	MAT1-2	Environmental	3	F219Y	G143A	Wildtype
E2	2008	Netherlands	Wildtype	MAT1-1	Environmental	4	Wildtype	Wildtype	Wildtype	PRJEB8623
E20	2015	UK	TR34/L98H	MAT1-2	Environmental	3	F219Y	G143A	H270Y	PRJEB27135
E200	2017	Colombia	TR46/Y121F/T289A	MAT1-2	Environmental	3	F219Y	G143A	H270R
E201±	2016	UK	TR34/L98H	MAT1-1	Environmental	3	Wildtype	G143A	Wildtype	PRJEB27135
E202	2016	UK	TR34	MAT1-1	Environmental	3	Wildtype	Wildtype	Wildtype	PRJEB27135
E203	2016	UK	TR34/L98H	MAT1-1	Environmental	3	Wildtype	G143A	Wildtype	PRJEB27135
E204 ±	2016	UK	Wildtype	MAT1-2	Environmental	5	Wildtype	Wildtype	Wildtype	PRJEB27135
E205 ±	2016	UK	TR34/L98H	MAT1-2	Environmental	2	Wildtype	Wildtype	Wildtype	PRJEB27135
E206±	2016	UK	TR34/L98H	MAT1-1	Environmental	3	Wildtype	G143A	Wildtype	PRJEB27135
E207	2013	Japan	Wildtype	MAT1-2	Environmental	5	Wildtype	Wildtype	Wildtype
E208	2013	Japan	Wildtype	MAT1-2	Environmental	5	Wildtype	Wildtype	Wildtype
E209	2013	Japan	Wildtype	MAT1-2	Environmental	4	Wildtype	Wildtype	Wildtype
E21	2015	UK	TR34/L98H	MAT1-2	Environmental	3	F219Y	G143A	Wildtype	PRJEB27135
E210	2013	Japan	Wildtype	MAT1-1	Environmental	3	Wildtype	Wildtype	Wildtype
E211	2013	Japan	Wildtype	MAT1-1	Environmental	5	Wildtype	Wildtype	Wildtype
E212	2013	Japan	Wildtype	MAT1-2	Environmental	5	Wildtype	Wildtype	Wildtype
E213±	2013	Japan	Wildtype	MAT1-2	Environmental	3	Wildtype	Wildtype	Wildtype
E214	2013	Japan	Wildtype	MAT1-1	Environmental	3	Wildtype	Wildtype	Wildtype
E215	2013	Japan	Wildtype	MAT1-2	Environmental	1	Wildtype	Wildtype	Wildtype
E216	2013	Japan	Wildtype	MAT1-2	Environmental	3	Wildtype	Wildtype	Wildtype
E217	2013	Japan	Wildtype	MAT1-2	Environmental	4	Wildtype	Wildtype	Wildtype
E218	2013	Japan	Wildtype	MAT1-2	Environmental	4	Wildtype	Wildtype	Wildtype
E219	2013	Japan	Wildtype	MAT1-2	Environmental	4	Wildtype	Wildtype	Wildtype
E22	2015	UK	TR34/L98H	MAT1-2	Environmental	3	F219Y	G143A	Wildtype	PRJEB27135
E220	2013	Japan	Wildtype	MAT1-1	Environmental	5	Wildtype	Wildtype	Wildtype
E221	2013	Japan	Wildtype	MAT1-2	Environmental	4	Wildtype	Wildtype	Wildtype
E222	2013	Japan	Wildtype	MAT1-2	Environmental	5	Wildtype	Wildtype	Wildtype
E223		UK	TR46/Y121F/T289A	MAT1-2	Environmental	3	F219Y	G143A	Wildtype
E224		UK	TR46/Y121F/T289A	MAT1-2	Environmental	3	F219Y	G143A	Wildtype
E225	2015	Europe	Wildtype	MAT1-2	Environmental	5	Wildtype	Wildtype	Wildtype
E226	2015	UK	Wildtype	MAT1-2	Environmental	5	Wildtype	Wildtype	Wildtype
E227	2015	South America	Wildtype	MAT-1-1	Environmental	1	Wildtype	Wildtype	Wildtype
E228	2015	Europe	Wildtype	MAT-1-1	Environmental	1	Wildtype	Wildtype	Wildtype
E229	2015	Netherlands	Wildtype	MAT-1-1	Environmental	1	Wildtype	Wildtype	Wildtype
E23 ±	2015	UK	TR34/L98H	MAT1-2	Environmental	2	Wildtype	Wildtype	Wildtype	PRJEB27135
E230	2015	UK	Wildtype	MAT-1-2	Environmental	1	Wildtype	Wildtype	Wildtype
E231	2015	UK	Wildtype	MAT-1-2	Environmental	1	Wildtype	Wildtype	Wildtype
E232	2017	North America	Wildtype	MAT-1-1	Environmental	1	Wildtype	Wildtype	Wildtype
E233	2015	Europe	Wildtype	MAT-1-2	Environmental	1	Wildtype	Wildtype	Wildtype
E234	2015	UK	Wildtype	MAT-1-1	Environmental	1	Wildtype	Wildtype	Wildtype
E235	2015	Netherlands	TR34/L98H	MAT1-2	Environmental	2	Wildtype	Wildtype	Wildtype
E236	2015	Asia	TR34/L98H	MAT1-2	Environmental	3	Wildtype	Wildtype	Wildtype
E237	2015	Asia	TR34/L98H	MAT1-2	Environmental	3	Wildtype	Wildtype	Wildtype
E238	2015	Netherlands	TR34/L98H	MAT1-2	Environmental	3	Wildtype	Wildtype	Wildtype
E239	2015	Netherlands	TR34/L98H	MAT1-2	Environmental	3	Wildtype	G143A	Wildtype
E24	2015	UK	TR34/L98H	MAT1-2	Environmental	2	Wildtype	Wildtype	Wildtype	PRJEB27135
E240	2015	Asia	TR34/L98H	MAT1-2	Environmental	1	Wildtype	Wildtype	Wildtype
E241	2015	Netherlands	TR34/L98H	MAT1-2	Environmental	2	Wildtype	Wildtype	Wildtype
E242	2015	UK	TR34/L98H	MAT1-2	Environmental	2	Wildtype	Wildtype	Wildtype
E243 ±	2015	Europe	TR34/L98H	MAT1-2	Environmental	2	Wildtype	Wildtype	Wildtype
E244±	2015	Netherlands	TR34/L98H	MAT1-2	Environmental	2	Wildtype	Wildtype	Wildtype
E245±	2015	Netherlands	TR34/L98H	MAT1-2	Environmental	3	F219Y	G143A	H270Y
E246	2015	Oceania	TR34/L98H	MAT1-2	Environmental	3	F219Y	G143A	Wildtype
E247±	2015	UK	TR34/L98H	MAT1-2	Environmental	3	Wildtype	G143A	H270Y
E248	2015	Netherlands	TR34/L98H	MAT1-2	Environmental	3	F219Y	Wildtype	Wildtype
E249	2015	Netherlands	TR34/L98H/T289A	MAT1-2	Environmental	3	F219Y	G143A	Wildtype
E25 ±	2015	UK	TR34/L98H	MAT1-2	Environmental	2	Wildtype	Wildtype	Wildtype	PRJEB27135
E250	2018	Netherlands	TR46/Y121F/T289A	MAT1-2	Environmental	3	F219Y	G143A	Wildtype
E251	2015	Asia	TR46/Y121F/T289A	MAT1-2	Environmental	4	F219Y	G143A	Wildtype
E252	2015	UK	TR46/Y121F/T289A	MAT1-2	Environmental	3	F219Y	G143A	H270Y
E253	2015	UK	TR46/Y121F/T289A	MAT1-2	Environmental	3	F219Y	G143A	H270Y
E254	2015	Netherlands	TR46/Y121F/T289A	MAT1-2	Environmental	3	F219Y	G143A	Wildtype
E255	2015	UK	TR46/Y121F/T289A	MAT1-2	Environmental	3	F219Y	G143A	Wildtype
E256	2015	Netherlands	TR46/Y121F/T289A	MAT1-2	Environmental	3	F219Y	G143A	Wildtype
E257	2018	Netherlands	TR46/Y121F/T289A	MAT1-2	Environmental	3	F219Y	G143A	H270R
E258	2015	South America	TR46/Y121F/T289A	MAT1-2	Environmental	3	F219Y	G143A	H270R
E259	2015	Africa	TR46/Y121F/T289A	MAT1-2	Environmental	3	F219Y	G143A	H270R
E26	2015	UK	TR34/L98H	MAT1-2	Environmental	3	F219Y	Wildtype	Wildtype	PRJEB27135
E260	2015	South America	TR46/Y121F/T289A	MAT1-2	Environmental	3	F219Y	G143A	H270R
E261	2015	Africa	Wildtype	MAT1-2	Environmental	4	Wildtype	Wildtype	Wildtype
E262	2015	UK	Wildtype	MAT1-2	Environmental	4	Wildtype	Wildtype	Wildtype
E263	2015	Netherlands	Wildtype	MAT1-2	Environmental	3	Wildtype	Wildtype	Wildtype
E264	2015	UK	Wildtype	MAT1-2	Environmental	3	Wildtype	Wildtype	Wildtype
E265	2015	UK	Wildtype	MAT1-2	Environmental	5	Wildtype	Wildtype	Wildtype
E266	2015	Europe	Wildtype	MAT1-2	Environmental	5	Wildtype	Wildtype	Wildtype
E267	2015	UK	Wildtype	MAT1-2	Environmental	4	Wildtype	Wildtype	Wildtype
E268	2015	UK	Wildtype	MAT1-2	Environmental	5	Wildtype	Wildtype	Wildtype
E269	2015	Europe	Wildtype	MAT1-2	Environmental	3	Wildtype	Wildtype	Wildtype
E27	2015	UK	TR34/L98H	MAT1-2	Environmental	2	Wildtype	Wildtype	Wildtype	PRJEB27135
E270	2015	UK	Wildtype	MAT1-2	Environmental	3	Wildtype	Wildtype	Wildtype
E271	2015	UK	Wildtype	MAT1-2	Environmental	3	Wildtype	Wildtype	Wildtype
E272	2015	Netherlands	Wildtype	MAT1-2	Environmental	3	Wildtype	Wildtype	Wildtype
E273	2015	Europe	Wildtype	MAT-1-2	Environmental	1	Wildtype	Wildtype	Wildtype
E274	2015	Europe	Wildtype	MAT1-2	Environmental	4	Wildtype	Wildtype	Wildtype
E275	2015	UK	Wildtype	MAT1-2	Environmental	5	Wildtype	Wildtype	Wildtype
E276	2015	UK	Wildtype	MAT1-2	Environmental	3	Wildtype	Wildtype	Wildtype
E277	2015	Europe	Wildtype	MAT1-2	Environmental	4	Wildtype	Wildtype	Wildtype
E278	2015	Europe	Wildtype	MAT1-2	Environmental	4	Wildtype	Wildtype	Wildtype
E279	2015	Oceania	Wildtype	MAT1-2	Environmental	4	Wildtype	Wildtype	Wildtype
E28	2015	UK	TR34/L98H	MAT1-2	Environmental	2	Wildtype	Wildtype	Wildtype	PRJEB27135
E280	2015	UK	Wildtype	MAT1-2	Environmental	4	Wildtype	Wildtype	Wildtype
E281	2007	Netherlands	TR34/L98H	MAT1-2	Environmental	3	Wildtype	Wildtype	Wildtype
E282	2007	Netherlands	TR34/L98H	MAT1-2	Environmental	3	Wildtype	Wildtype	Wildtype
E283	2016	USA	Wildtype	MAT1-2	Environmental	1	Wildtype	Wildtype	Wildtype
E284		USA	Wildtype	MAT-1-2	Environmental	1	Wildtype	Wildtype	Wildtype
E285	2015	USA	Wildtype	MAT1-2	Environmental	4	Wildtype	Wildtype	Wildtype
E286	2015	USA	Wildtype	MAT1-2	Environmental	5	Wildtype	Wildtype	Wildtype
E287	2018	UK	Wildtype	MAT-1-1	Environmental	3	Wildtype	Wildtype	Wildtype
E288	2018	UK	TR46/Y121F/T289A	MAT-1-1	Environmental	3	F219Y	G143A	Wildtype
E289	2018	UK	Wildtype	MAT-1-1	Environmental	5	Wildtype	Wildtype	Wildtype
E29 ±	2015	UK	TR34/L98H	MAT1-2	Environmental	2	Wildtype	Wildtype	Wildtype	PRJEB27135
E290	2018	UK	TR34/L98H	MAT-1-1	Environmental	2	Wildtype	Wildtype	Wildtype
E291	2018	UK	Wildtype	MAT-1-2	Environmental	4	Wildtype	Wildtype	Wildtype	PRJEB51237
E292	2018	UK	Wildtype	MAT-1-1	Environmental	3	Wildtype	Wildtype	Wildtype	PRJEB51237
E293	2018	UK	TR34/L98H	MAT-1-1	Environmental	3	Wildtype	Wildtype	Wildtype	PRJEB51237
E294	2018	UK	Wildtype	MAT-1-2	Environmental	1	Wildtype	Wildtype	Wildtype	PRJEB51237
E295	2018	UK	Wildtype	MAT-1-1	Environmental	3	Wildtype	Wildtype	Wildtype
E296	2018	UK	TR34/L98H	MAT-1-2	Environmental	3	F219Y	Wildtype	Wildtype	PRJEB51237
E297	2018	UK	Wildtype	MAT-1-1	Environmental	5	Wildtype	Wildtype	Wildtype
E298	2018	UK	TR34/L98H	MAT-1-2	Environmental	3	Wildtype	Wildtype	Wildtype	PRJEB51237
E299	2018	UK	Wildtype	MAT-1-2	Environmental	3	Wildtype	Wildtype	Wildtype	PRJEB51237
E3	2008	Netherlands	TR34/L98H	MAT1-1	Environmental	3	Wildtype	Wildtype	Wildtype	PRJEB8623
E30 ±	2015	UK	TR34/L98H	MAT1-2	Environmental	2	Wildtype	Wildtype	Wildtype	PRJEB27135
E300	2018	UK	Wildtype	MAT-1-1	Environmental	5	Wildtype	Wildtype	Wildtype	PRJEB51237
E301	2018	UK	Wildtype	MAT-1-2	Environmental	5	Wildtype	Wildtype	Wildtype
E302	2018	UK	TR34/L98H	MAT-1-2	Environmental	3	Wildtype	Wildtype	Wildtype	PRJEB51237
E303	2018	UK	Wildtype	MAT-1-2	Environmental	5	Wildtype	Wildtype	Wildtype
E304	2018	UK	TR34/L98H	MAT-1-2	Environmental	3	Wildtype	Wildtype	Wildtype	PRJEB51237
E305	2018	UK	Wildtype	MAT-1-1	Environmental	1	Wildtype	Wildtype	Wildtype	PRJEB51237
E306	2018	UK	TR34/L98H	MAT-1-1	Environmental	3	Wildtype	Wildtype	Wildtype	PRJEB51237
E307	2018	UK	TR34/L98H	MAT-1-1	Environmental	3	Wildtype	Wildtype	Wildtype	PRJEB51237
E308	2018	UK	Wildtype	MAT-1-1	Environmental	5	Wildtype	Wildtype	Wildtype
E309	2018	UK	TR34/L98H	MAT-1-1	Environmental	1	Wildtype	Wildtype	Wildtype	PRJEB51237
E31	2015	UK	TR34/L98H	MAT1-2	Environmental	2	Wildtype	Wildtype	Wildtype	PRJEB27135
E311	2018	UK	Wildtype	MAT-1-1	Environmental	5	Wildtype	Wildtype	Wildtype	PRJEB51237
E312	2018	UK	TR34/L98H	MAT-1-1	Environmental	4	Wildtype	Wildtype	Wildtype	PRJEB51237
E313	2018	UK	Wildtype	MAT-1-1	Environmental	3	Wildtype	Wildtype	Wildtype	PRJEB51237
E315	2018	UK	TR34/L98H	MAT-1-2	Environmental	3	Wildtype	Wildtype	Wildtype	PRJEB51237
E316	2018	UK	TR34/L98H	MAT-1-2	Environmental	3	Wildtype	Wildtype	Wildtype	PRJEB51237
E317	2018	UK	Wildtype	MAT-1-2	Environmental	5	Wildtype	Wildtype	Wildtype
E318	2018	UK	TR34/L98H	MAT-1-2	Environmental	3	Wildtype	Wildtype	Wildtype	PRJEB51237
E32 ±	2015	UK	TR34/L98H	MAT1-2	Environmental	3	Wildtype	Wildtype	Wildtype	PRJEB27135
E321	2018	UK	Wildtype	MAT-1-2	Environmental	5	Wildtype	Wildtype	Wildtype
E322	2018	UK	TR34/L98H	MAT-1-2	Environmental	3	Wildtype	Wildtype	Wildtype	PRJEB51237
E323	2018	UK	TR34/L98H	MAT-1-1	Environmental	3	Wildtype	Wildtype	Wildtype	PRJEB51237
E324	2018	UK	TR34/L98H	MAT-1-1	Environmental	2	Wildtype	Wildtype	Wildtype
E325	2018	UK	TR34/L98H	MAT-1-1	Environmental	2	Wildtype	Wildtype	Wildtype	PRJEB51237
E326	2018	UK	Wildtype	MAT-1-1	Environmental	1	Wildtype	Wildtype	Wildtype	PRJEB51237
E327	2018	UK	TR34/L98H	MAT-1-2	Environmental	3	Wildtype	Wildtype	Wildtype	PRJEB51237
E329	2018	UK	Wildtype	MAT-1-1	Environmental	5	Wildtype	Wildtype	Wildtype	PRJEB51237
E33	2015	UK	G54R	MAT1-2	Environmental	1	Wildtype	Wildtype	Wildtype	PRJEB27135
E330	2018	Netherlands	TR34	MAT-1-2	Environmental	1	Wildtype	G143A	Wildtype
E331	2018	Netherlands	Wildtype	MAT-1-2	Environmental	4	Wildtype	Wildtype	Wildtype
E332	2018	Netherlands	Wildtype	MAT-1-2	Environmental	3	Wildtype	Wildtype	Wildtype
E333	2018	Netherlands	TR34/L98H	MAT-1-1	Environmental	3	Wildtype	G143A	Wildtype
E334	2018	Netherlands	TR34/L98H	MAT-1-1	Environmental	3	F219Y	Wildtype	H270Y
E335	2018	Netherlands	Wildtype	MAT-1-1	Environmental	3	Wildtype	Wildtype	Wildtype
E336	2018	Netherlands	Wildtype	MAT-1-1	Environmental	4	Wildtype	Wildtype	Wildtype
E337	2018	Netherlands	TR46/Y121F/T289A	MAT-1-1	Environmental	3	F219Y	G143A	Wildtype
E338	2018	Netherlands	Wildtype	MAT-1-1	Environmental	5	Wildtype	Wildtype	Wildtype
E339	2018	Netherlands	TR34/L98H	MAT-1-2	Environmental	3	F219Y	G143A	Wildtype
E34	2015	UK	TR34/L98H	MAT1-2	Environmental	3	Wildtype	Wildtype	Wildtype	PRJEB27135
E340	2018	Netherlands	Wildtype	MAT-1-2	Environmental	5	Wildtype	Wildtype	Wildtype
E341	2018	Netherlands	TR34/L98H	MAT-1-1	Environmental	2	Wildtype	Wildtype	Wildtype
E342	2018	UK	TR34/L98H	MAT-1-1	Environmental	2	Wildtype	Wildtype	Wildtype	PRJEB51237
E343	2018	UK	Wildtype	MAT-1-2	Environmental	4	Wildtype	Wildtype	Wildtype	PRJEB51237
E344	2018	UK	Wildtype	MAT-1-2	Environmental	4	Wildtype	Wildtype	Wildtype	PRJEB51237
E345	2018	UK	D262Y	MAT-1-2	Environmental	5	Wildtype	Wildtype	Wildtype	PRJEB51237
E346	2018	UK	Wildtype	MAT-1-2	Environmental	5	Wildtype	Wildtype	Wildtype
E347	2018	UK	TR34/L98H	MAT-1-2	Environmental	2	Wildtype	Wildtype	Wildtype	PRJEB51237
E348	2018	UK	Wildtype	MAT-1-2	Environmental	4	Wildtype	Wildtype	Wildtype
E349	2018	UK	TR34/L98H	MAT-1-2	Environmental	3	F219Y	Wildtype	Wildtype	PRJEB51237
E35	2015	UK	TR34/L98H	MAT1-1	Environmental	3	Wildtype	G143A	H270Y	PRJEB27135
E350	2018	UK	Wildtype	MAT-1-1	Environmental	4	Wildtype	Wildtype	Wildtype	PRJEB51237
E351	2018	UK	Wildtype	MAT-1-1	Environmental	4	Wildtype	Wildtype	Wildtype	PRJEB51237
E352	2018	UK	Wildtype	MAT-1-2	Environmental	3	Wildtype	Wildtype	Wildtype	PRJEB51237
E353	2018	UK	TR34/L98H	MAT-1-2	Environmental	1	F219Y	Wildtype	Wildtype	PRJEB51237
E354	2018	UK	Wildtype	MAT-1-2	Environmental	3	Wildtype	Wildtype	Wildtype
E355	2018	UK	TR34/L98H	MAT-1-2	Environmental	1	F219Y	Wildtype	Wildtype	PRJEB51237
E356	2018	UK	Wildtype	MAT-1-2	Environmental	5	Wildtype	Wildtype	Wildtype
E357	2018	UK	TR34/L98H	MAT-1-1	Environmental	2	Wildtype	Wildtype	Wildtype	PRJEB51237
E359	2018	UK	TR34/L98H	MAT-1-1	Environmental	2	Wildtype	Wildtype	Wildtype	PRJEB51237
E36 ±	2015	UK	TR34/L98H	MAT1-2	Environmental	3	F219Y	G143A	Wildtype	PRJEB27135
E360	2018	UK	Wildtype	MAT-1-2	Environmental	4	Wildtype	Wildtype	Wildtype	PRJEB51237
E361	2018	UK	Wildtype	MAT-1-1	Environmental	5	Wildtype	Wildtype	Wildtype	PRJEB51237
E362	2018	UK	Wildtype	MAT-1-1	Environmental	5	Wildtype	Wildtype	Wildtype
E363	2018		Wildtype	MAT-1-2	Environmental	4	Wildtype	Wildtype	Wildtype	PRJEB51237
E364	2018	UK	TR34/L98H	MAT-1-1	Environmental	2	Wildtype	Wildtype	Wildtype	PRJEB51237
E365	2018	UK	Wildtype	MAT-1-2	Environmental	5	Wildtype	Wildtype	Wildtype	PRJEB51237
E367	2018	Germany	Wildtype	MAT-1-1	Environmental	3	Wildtype	Wildtype	Wildtype
E368	2018	Germany	TR34/L98H	MAT-1-2	Environmental	3	Wildtype	Wildtype	Wildtype
E369	2018	Germany	Wildtype	MAT-1-1	Environmental	3	Wildtype	Wildtype	Wildtype
E37	2015	UK	TR34/L98H	MAT1-2	Environmental	1	F219Y	Wildtype	Wildtype	PRJEB27135
E370	2018	Germany	TR34/L98H	MAT-1-1	Environmental	2	Wildtype	Wildtype	Wildtype
E371	2018	UK	Wildtype	MAT-1-1	Environmental	5	Wildtype	Wildtype	Wildtype	PRJEB51237
E372	2018	UK	Wildtype	MAT-1-1	Environmental	5	Wildtype	Wildtype	Wildtype	PRJEB51237
E373	2018	UK	TR34	MAT-1-2	Environmental	2	Wildtype	Wildtype	Wildtype	PRJEB51237
E374	2018	UK	TR34/L98H	MAT-1-1	Environmental	3	Wildtype	Wildtype	Wildtype	PRJEB51237
E375	2018	UK	D262Y	MAT-1-2	Environmental	4	Wildtype	Wildtype	Wildtype
E376	2018	UK	TR34/L98H	MAT-1-1	Environmental	2	Wildtype	Wildtype	Wildtype	PRJEB51237
E377	2018	UK	Wildtype	MAT-1-2	Environmental	5	Wildtype	Wildtype	Wildtype	PRJEB51237
E378	2018	UK	Wildtype	MAT-1-1	Environmental	3	Wildtype	Wildtype	Wildtype	PRJEB51237
E379	2018	UK	Wildtype	MAT-1-2	Environmental	4	Wildtype	Wildtype	Wildtype	PRJEB51237
E38	2015	UK	TR34/L98H	MAT1-2	Environmental	2	Wildtype	Wildtype	Wildtype	PRJEB27135
E380	2018	UK	TR34/L98H	MAT-1-2	Environmental	2	Wildtype	Wildtype	Wildtype
E381	2018	UK	TR34/L98H	MAT-1-2	Environmental	2	Wildtype	Wildtype	Wildtype	PRJEB51237
E382	2018	UK	TR34/L98H	MAT-1-1	Environmental	2	Wildtype	Wildtype	Wildtype	PRJEB51237
E383	2018	UK	TR34/L98H	MAT-1-1	Environmental	4	Wildtype	Wildtype	Wildtype	PRJEB51237
E385	2018	UK	TR34/L98H	MAT-1-2	Environmental	2	Wildtype	Wildtype	Wildtype	PRJEB51237
E386	2018	UK	TR34/L98H	MAT-1-1	Environmental	1	F219Y	Wildtype	Wildtype	PRJEB51237
E387	2018	UK	Wildtype	MAT-1-2	Environmental	4	Wildtype	Wildtype	Wildtype	PRJEB51237
E388	2018	UK	Wildtype	MAT-1-2	Environmental	5	Wildtype	Wildtype	Wildtype	PRJEB51237
E389	2021	Republic of Ireland	TR34/L98H	MAT-1-1	Environmental	3	Wildtype	Wildtype	Wildtype
E39 ±	2014	Republic of Ireland	TR34/L98H	MAT1-1	Environmental	3	Wildtype	Wildtype	Wildtype	PRJEB27135
E390	2021	Republic of Ireland	TR34/L98H	MAT-1-1	Environmental	3	Wildtype	Wildtype	Wildtype
E391	2021	Republic of Ireland	TR34/L98H	MAT-1-1	Environmental	3	Wildtype	Wildtype	Wildtype
E392	2021	Republic of Ireland	TR34/L98H	MAT-1-2	Environmental	3	Wildtype	Wildtype	Wildtype
E393	2021	Republic of Ireland	TR34/L98H	MAT-1-1	Environmental	3	Wildtype	Wildtype	Wildtype
E394	2021	Republic of Ireland	TR34/L98H	MAT-1-1	Environmental	3	Wildtype	Wildtype	Wildtype
E395	2021	Republic of Ireland	TR34/L98H	MAT-1-1	Environmental	3	Wildtype	Wildtype	Wildtype
E396	2021	Republic of Ireland	TR34/L98H	MAT-1-1	Environmental	3	Wildtype	Wildtype	Wildtype
E397	2021	Republic of Ireland	TR34/L98H	MAT-1-1	Environmental	3	Wildtype	Wildtype	Wildtype
E398	2021	Republic of Ireland	TR34/L98H	MAT-1-2	Environmental	3	Wildtype	Wildtype	Wildtype
E399	2021	Republic of Ireland	Wildtype	MAT-1-1	Environmental	3	Wildtype	Wildtype	Wildtype
E4±	2008	Netherlands	TR34/L98H	MAT1-2	Environmental	3	Wildtype	G143A	Wildtype	PRJEB8623
E40±	2014	Republic of Ireland	TR46/Y121F/T289A	MAT1-2	Environmental	3	F219Y	G143A	Wildtype	PRJEB27135
E400	2021	Republic of Ireland	TR34/L98H	MAT-1-1	Environmental	3	Wildtype	Wildtype	Wildtype
E401	2011	New Zealand	Wildtype	MAT1-1	Environmental	1	Wildtype	Wildtype	Wildtype	PRJNA726267
E402	2018	New Zealand	Wildtype	MAT1-2	Environmental	1	Wildtype	Wildtype	Wildtype	PRJNA726267
E403	2019	New Zealand	Wildtype	MAT1-2	Environmental	3	Wildtype	Wildtype	Wildtype	PRJNA726267
E404	2019	New Zealand	Wildtype	MAT1-2	Environmental	3	Wildtype	Wildtype	Wildtype	PRJNA726267
E405	2019	New Zealand	Wildtype	MAT1-2	Environmental	3	Wildtype	Wildtype	Wildtype	PRJNA726267
E406	2019	New Zealand	Wildtype	MAT1-2	Environmental	3	Wildtype	Wildtype	Wildtype	PRJNA726267
E407	2019	New Zealand	Wildtype	MAT1-2	Environmental	3	Wildtype	Wildtype	Wildtype	PRJNA726267
E408	2019	New Zealand	Wildtype	MAT1-2	Environmental	3	Wildtype	Wildtype	Wildtype	PRJNA726267
E409	2019	New Zealand	Wildtype	MAT1-2	Environmental	3	Wildtype	Wildtype	Wildtype	PRJNA726267
E41±	2014	Republic of Ireland	TR34/L98H	MAT1-2	Environmental	3	F219Y	Wildtype	Wildtype	PRJEB27135
E410	2012	New Zealand	Wildtype	MAT1-2	Environmental	5	Wildtype	Wildtype	Wildtype	PRJNA726267
E411	2019	New Zealand	Wildtype	MAT1-2	Environmental	3	Wildtype	Wildtype	Wildtype	PRJNA726267
E412	1961	New Zealand	Wildtype	MAT1-2	Environmental	1	Wildtype	Wildtype	Wildtype	PRJNA726267
E413	2019	New Zealand	Wildtype	MAT1-2	Environmental	3	Wildtype	Wildtype	Wildtype	PRJNA726267
E414	2019	New Zealand	Wildtype	MAT1-2	Environmental	3	Wildtype	Wildtype	Wildtype	PRJNA726267
E415	2019	New Zealand	Wildtype	MAT1-2	Environmental	3	Wildtype	Wildtype	Wildtype	PRJNA726267
E416	2019	New Zealand	Wildtype	MAT1-2	Environmental	3	Wildtype	Wildtype	Wildtype	PRJNA726267
E417	2019	New Zealand	Wildtype	MAT1-2	Environmental	3	Wildtype	Wildtype	Wildtype	PRJNA726267
E418	2019	New Zealand	Wildtype	MAT1-2	Environmental	3	Wildtype	Wildtype	Wildtype	PRJNA726267
E419	2019	New Zealand	Wildtype	MAT1-2	Environmental	3	Wildtype	Wildtype	Wildtype	PRJNA726267
E42±	2016	Republic of Ireland	TR34/L98H	MAT1-2	Environmental	3	F219Y	Wildtype	Wildtype	PRJEB27135
E420	2011	New Zealand	Wildtype	MAT1-2	Environmental	5	Wildtype	Wildtype	Wildtype	PRJNA726267
E421	2011	New Zealand	Wildtype	MAT1-2	Environmental	5	Wildtype	Wildtype	Wildtype	PRJNA726267
E423	1962	New Zealand	Wildtype	MAT1-2	Environmental	3	Wildtype	Wildtype	Wildtype	PRJNA726267
E424	2019	New Zealand	Wildtype	MAT1-2	Environmental	3	Wildtype	Wildtype	Wildtype	PRJNA726267
E425	2015	USA	TR34/L98H	MAT-1-2	Environmental	4	F219Y	G143A	Wildtype
E426	2015	USA	TR34/L98H	MAT-1-2	Environmental	4	F219Y	G143A	Wildtype
E427	2015	USA	Wildtype	MAT-1-2	Environmental	1	Wildtype	Wildtype	Wildtype
E428	2015	USA	Wildtype	MAT-1-1	Environmental	3	Wildtype	Wildtype	Wildtype
E429	2015	USA	Wildtype	MAT-1-2	Environmental	4	Wildtype	Wildtype	Wildtype
E43±	2016	Republic of Ireland	TR34/L98H	MAT1-1	Environmental	1	Wildtype	G143A	Wildtype	PRJEB27135
E430	2015	USA	Wildtype	MAT-1-2	Environmental	4	Wildtype	Wildtype	Wildtype
E431	2015	USA	Wildtype	MAT-1-1	Environmental	4	Wildtype	Wildtype	Wildtype
E432	2015	USA	TR34/L98H	MAT-1-2	Environmental	4	F219Y	G143A	Wildtype
E433	2015	USA	Wildtype	MAT-1-1	Environmental	3	Wildtype	Wildtype	Wildtype
E434	2015	USA	TR34/L98H	MAT-1-2	Environmental	4	F219Y	G143A	Wildtype
E435	2015	USA	TR34/L98H	MAT-1-2	Environmental	4	F219Y	G143A	Wildtype
E436	2015	USA	Wildtype	MAT-1-1	Environmental	3	Wildtype	Wildtype	Wildtype
E437	2015	USA	TR34/L98H	MAT-1-2	Environmental	1	F219Y	G143A	Wildtype
E438	2019	UK	TR46/Y121F/T289A/S363P/I364V/G448S	MAT-1-2	Environmental	3	F219Y	G143A	Wildtype
E439	2019	UK	TR34/L98H	MAT-1-1	Environmental	3	F219Y	Wildtype	Wildtype
E44±	2015	Republic of Ireland	TR46/Y121F/T289A	MAT1-1	Environmental	4	F219Y	G143A	Wildtype	PRJEB27135
E440	2019	UK	Wildtype	MAT-1-1	Environmental	3	Wildtype	Wildtype	Wildtype
E441	2019	UK	TR34/L98H	MAT-1-1	Environmental	1	Wildtype	Wildtype	Wildtype
E442	2019	UK	TR34/L98H	MAT-1-2	Environmental	3	F219Y	Wildtype	Wildtype
E443	2019	UK	TR34/L98H	MAT-1-2	Environmental	1	F219Y	Wildtype	Wildtype
E444	2019	UK	Wildtype	MAT-1-2	Environmental	3	Wildtype	Wildtype	Wildtype
E445	2019	UK	TR34/L98H	MAT-1-2	Environmental	3	F219Y	Wildtype	Wildtype
E446	2019	UK	TR34/L98H	MAT-1-2	Environmental	3	F219Y	Wildtype	Wildtype
E447	2019	UK	TR34/L98H	MAT-1-2	Environmental	3	F219Y	Wildtype	Wildtype
E448	2019	UK	TR34/L98H	MAT-1-2	Environmental	2	Wildtype	Wildtype	Wildtype
E449	2019	UK	TR34/L98H	MAT-1-2	Environmental	3	F219Y	Wildtype	Wildtype
E45±	2015	Republic of Ireland	TR34/L98H	MAT1-2	Environmental	3	F219Y	G143A	Wildtype	PRJEB27135
E450	2019	UK	TR34/L98H	MAT-1-1	Environmental	3	Wildtype	Wildtype	Wildtype
E451	2019	UK	TR34/L98H	MAT-1-1	Environmental	2	Wildtype	Wildtype	Wildtype
E453	2019	UK	Wildtype	MAT-1-2	Environmental	4	Wildtype	Wildtype	Wildtype
E454	2019	UK	Wildtype	MAT-1-2	Environmental	4	Wildtype	Wildtype	Wildtype
E455	2019	UK	I242V	MAT-1-2	Environmental	4	Wildtype	Wildtype	Wildtype
E456	2019	UK	I242V	MAT-1-2	Environmental	4	Wildtype	Wildtype	Wildtype
E457	2019	UK	TR34/L98H	MAT-1-1	Environmental	4	Wildtype	Wildtype	Wildtype
E458	2019	UK	I242V	MAT-1-2	Environmental	4	Wildtype	Wildtype	Wildtype
E459	2019	UK	C270R	MAT-1-1	Environmental	5	Wildtype	Wildtype	Wildtype
E46	2015	Republic of Ireland	TR46/Y121F/T289A	MAT1-2	Environmental	3	F219Y	G143A	Wildtype	PRJEB27135
E460	2019	UK	TR46/Y121F/T289A	MAT-1-1	Environmental	3	Wildtype	G143A	Wildtype
E461	2019	UK	TR34/L98H/T289A/I364V/G448S	MAT-1-1	Environmental	3	F219Y	G143A	Wildtype
E462	2019	UK	Wildtype	MAT-1-2	Environmental	3	F219Y	G143A	H270Y
E463	2019	UK	Y121F/T289A/S363P/I364V/G448S	MAT-1-2	Environmental	3	F219Y	G143A	Wildtype
E464	2019	UK	TR46/Y121F/T289A/S363P/I364V/G448S	MAT-1-2	Environmental	3	F219Y	G143A	Wildtype
E465	2019	UK	TR46/Y121F/T289A/S363P/I364V/G448S	MAT-1-2	Environmental	3	F219Y	G143A	Wildtype
E466	2019	UK	TR46/Y121F/T289A/S363P/I364V/G448S	MAT-1-2	Environmental	3	F219Y	G143A	Wildtype
E467	2019	UK	D430G	MAT-1-2	Environmental	4	Wildtype	Wildtype	Wildtype
E468	2019	UK	D430G	MAT-1-2	Environmental	4	Wildtype	Wildtype	Wildtype
E469	2019	UK	D430G	MAT-1-2	Environmental	4	Wildtype	Wildtype	Wildtype
E470	2019	UK	D430G	MAT-1-2	Environmental	4	Wildtype	Wildtype	Wildtype
E471	2019	UK	TR46/Y121F/T289A/S363P/I364V/G448S	MAT-1-1	Environmental	3	F219Y	G143A	Wildtype
E472	2019	UK	D430G	MAT-1-2	Environmental	4	Wildtype	Wildtype	Wildtype
E473	2019	UK	TR34/L98H	MAT-1-1	Environmental	3	Wildtype	Wildtype	Wildtype
E474	2019	UK	TR34/L98H	MAT-1-2	Environmental	3	Wildtype	Wildtype	Wildtype
E475	2019	UK	TR34/L98H/T289A/I364V/G448S	MAT-1-2	Environmental	3	F219Y	G143A	Wildtype
E476	2019	UK	TR34/L98H/T289A/I364V/G448S	MAT-1-2	Environmental	3	F219Y	G143A	Wildtype
E477	2019	UK	TR34/L98H/T289A/I364V/G448S	MAT-1-2	Environmental	3	F219Y	G143A	Wildtype
E478	2019	UK	TR46/Y121F/T289A	MAT-1-1	Environmental	3	F219Y	G143A	Wildtype
E479	2019	UK	TR46/Y121F/T289A	MAT-1-1	Environmental	3	F219Y	G143A	H270R
E48	2015	Republic of Ireland	TR46/Y121F/T289A	MAT1-1	Environmental	4	F219Y	G143A	Wildtype	PRJEB27135
E480	2019	UK	TR34/L98H	MAT-1-2	Environmental	3	F219Y	G143A	Wildtype
E481	2019	UK	TR34/L98H	MAT-1-2	Environmental	3	F219Y	G143A	Wildtype
E482	2019	UK	Wildtype	MAT-1-2	Environmental	3	F219Y	G143A	H270Y
E483	2019	UK	TR46/Y121F/T289A	MAT-1-1	Environmental	3	F219Y	G143A	Wildtype
E484	2019	UK	TR46/Y121F/T289A	MAT-1-2	Environmental	1	F219Y	G143A	Wildtype
E485	2019	UK	TR46/Y121F/T289A/G448S	MAT-1-1	Environmental	3	F219Y	G143A	Wildtype
E486	2019	UK	TR34/L98H	MAT-1-1	Environmental	3	Wildtype	Wildtype	Wildtype
E487	2019	UK	TR34/L98H	MAT-1-1	Environmental	3	Wildtype	Wildtype	Wildtype
E488	2019	UK	TR34/L98H	MAT-1-2	Environmental	3	F219Y	Wildtype	Wildtype
E489	2019	UK	TR46/Y121F/T289A	MAT-1-2	Environmental	3	F219Y	G143A	Wildtype
E49	2015	Republic of Ireland	TR34/L98H	MAT1-2	Environmental	3	F219Y	G143A	H270Y	PRJEB27135
E490	2019	UK	TR34/L98H	MAT-1-1	Environmental	3	Wildtype	Wildtype	Wildtype
E491	2019	UK	Wildtype	MAT-1-2	Environmental	3	Wildtype	Wildtype	Wildtype
E492	2019	UK	Wildtype	MAT-1-1	Environmental	5	Wildtype	Wildtype	Wildtype
E493	2019	UK	Wildtype	MAT-1-1	Environmental	5	Wildtype	Wildtype	Wildtype
E494	2019	UK	Wildtype	MAT-1-2	Environmental	4	Wildtype	Wildtype	Wildtype
E495	2019	UK	I242V	MAT-1-2	Environmental	4	Wildtype	Wildtype	Wildtype
E497	2019	UK	I242V	MAT-1-2	Environmental	4	Wildtype	Wildtype	Wildtype
E498	2019	UK	Wildtype	MAT-1-1	Environmental	3	Wildtype	Wildtype	Wildtype
E499	2019	UK	Wildtype	MAT-1-2	Environmental	5	Wildtype	Wildtype	Wildtype
E5	2011	India	TR34/L98H	MAT1-1	Environmental	1	F219Y	G143A	Wildtype	PRJEB8623
E50 ±	2015	Republic of Ireland	TR46/Y121F/T289A	MAT1-2	Environmental	3	F219Y	G143A	H270Y	PRJEB27135
E500	2018	UK	TR46/Y121F/T289A	MAT-1-1	Environmental	3	F219Y	G143A	Wildtype
E501	2018	UK	TR34/L98H	MAT-1-2	Environmental	3	F219Y	G143A	H270Y
E502	2018	UK	TR34/L98H	MAT-1-1	Environmental	3	Wildtype	G143A	H270Y
E503	2018	UK	Wildtype	MAT-1-2	Environmental	3	Wildtype	Wildtype	Wildtype
E505	2018	UK	Wildtype	MAT-1-2	Environmental	4	Wildtype	Wildtype	Wildtype
E506	2018	UK	TR34/L98H	MAT-1-1	Environmental	3	Wildtype	Wildtype	Wildtype
E507	2018	UK	TR34/L98H	MAT-1-1	Environmental	3	Wildtype	Wildtype	Wildtype
E508	2018	UK	TR34/L98H	MAT-1-1	Environmental	3	Wildtype	Wildtype	Wildtype
E509	2018	UK	TR34/L98H	MAT-1-1	Environmental	3	Wildtype	Wildtype	Wildtype
E510	2018	UK	TR34/L98H	MAT-1-1	Environmental	3	Wildtype	Wildtype	Wildtype
E511	2018	UK	TR34/L98H	MAT-1-1	Environmental	3	Wildtype	Wildtype	Wildtype
E512	2018	Iceland	Wildtype	MAT-1-1	Environmental	3	Wildtype	Wildtype	Wildtype
E513	2018	Iceland	Wildtype	MAT-1-2	Environmental	5	Wildtype	Wildtype	Wildtype
E514	2018	Iceland	Wildtype	MAT-1-1	Environmental	3	Wildtype	Wildtype	Wildtype
E515	2018	Iceland	Wildtype	MAT-1-1	Environmental	3	Wildtype	Wildtype	Wildtype
E516	2018	Iceland	TR46/Y121F/T289A	MAT-1-1	Environmental	3	F219Y	G143A	Wildtype
E517	2018	Iceland	TR46/Y121F/T289A	MAT-1-1	Environmental	3	F219Y	G143A	Wildtype
E518	2018	Iceland	Wildtype	MAT-1-1	Environmental	3	Wildtype	Wildtype	Wildtype
E519	2018	Iceland	TR46/Y121F/T289A	MAT-1-2	Environmental	3	F219Y	G143A	Wildtype
E52±	2015	Republic of Ireland	Wildtype	MAT1-1	Environmental	4	Wildtype	Wildtype	Wildtype	PRJEB27135
E520	2018	Iceland	Wildtype	MAT-1-1	Environmental	3	Wildtype	Wildtype	Wildtype
E521	2018	Iceland	TR46/Y121F/T289A	MAT-1-1	Environmental	3	F219Y	G143A	Wildtype
E522	2018	Iceland	TR34/L98H	MAT-1-2	Environmental	3	F219Y	G143A	H270Y
E523	2018	Iceland	TR34/L98H	MAT-1-2	Environmental	3	F219Y	G143A	H270Y
E524	2018	Iceland	TR34/L98H	MAT-1-2	Environmental	3	F219Y	G143A	Wildtype
E525	2018	Iceland	TR34/L98H	MAT-1-1	Environmental	4	F219Y	G143A	Wildtype
E526	2018	Iceland	TR34/L98H	MAT-1-2	Environmental	3	F219Y	G143A	H270Y
E528	2018	UK	Wildtype	MAT-1-1	Environmental	5	F219Y	Wildtype	Wildtype
E529	2018	UK	TR34/L98H	MAT-1-2	Environmental	3	F219Y	Wildtype	Wildtype
E53 ±	2015	Republic of Ireland	Wildtype	MAT1-2	Environmental	4	Wildtype	Wildtype	Wildtype	PRJEB27135
E530	2018	UK	TR34/L98H	MAT-1-2	Environmental	2	Wildtype	Wildtype	Wildtype
E531	1992	Russia	Wildtype	MAT-1-2	Environmental	3	Wildtype	Wildtype	Wildtype
E532	1992	Russia	Wildtype	MAT-1-2	Environmental	3	Wildtype	Wildtype	Wildtype
E533	2018	USA	Wildtype	MAT-1-2	Environmental	4	Wildtype	Wildtype	Wildtype	PRJNA742769
E534	2018	USA	Wildtype	MAT-1-2	Environmental	4	Wildtype	Wildtype	H270Y	PRJNA742769
E535	2018	USA	Wildtype	MAT-1-1	Environmental	4	Wildtype	Wildtype	Wildtype	PRJNA742769
E536	2018	USA	Wildtype	MAT-1-2	Environmental	4	Wildtype	Wildtype	Wildtype	PRJNA742769
E537	2018	USA	Wildtype	MAT-1-2	Environmental	1	Wildtype	Wildtype	Wildtype	PRJNA742769
E538	2018	USA	Wildtype	MAT-1-1	Environmental	4	Wildtype	Wildtype	Wildtype	PRJNA742769
E539	2017	USA	Wildtype	MAT-1-1	Environmental	4	Wildtype	Wildtype	Wildtype	PRJNA742769
E540	2018	USA	Wildtype	MAT-1-1	Environmental	5	Wildtype	Wildtype	Wildtype	PRJNA742769
E542	2018	USA	Wildtype	MAT-1-2	Environmental	4	Wildtype	Wildtype	Wildtype	PRJNA742769
E544	2018	USA	Wildtype	MAT-1-1	Environmental	4	Wildtype	Wildtype	Wildtype	PRJNA742769
E545	2018	USA	Wildtype	MAT-1-2	Environmental	4	Wildtype	Wildtype	Wildtype	PRJNA742769
E546	2018	USA	Wildtype	MAT-1-2	Environmental	4	Wildtype	Wildtype	Wildtype	PRJNA742769
E547	2018	USA	Wildtype	MAT-1-2	Environmental	4	Wildtype	Wildtype	Wildtype	PRJNA742769
E548	2018	USA	Wildtype	MAT-1-2	Environmental	5	Wildtype	Wildtype	Wildtype	PRJNA742769
E549	2018	USA	Wildtype	MAT-1-1	Environmental	4	Wildtype	Wildtype	Wildtype	PRJNA742769
E550	2017	USA	Wildtype	MAT-1-1	Environmental	4	Wildtype	Wildtype	Wildtype	PRJNA742769
E551	2018	USA	Wildtype	MAT-1-1	Environmental	5	Wildtype	Wildtype	Wildtype	PRJNA742769
E552	2018	USA	Wildtype	MAT-1-2	Environmental	4	Wildtype	Wildtype	Wildtype	PRJNA742769
E553	2018	USA	Wildtype	MAT-1-1	Environmental	1	Wildtype	Wildtype	Wildtype	PRJNA742769
E554	2018	USA	Wildtype	MAT-1-1	Environmental	4	Wildtype	Wildtype	Wildtype	PRJNA742769
E555	2018	USA	Wildtype	MAT-1-1	Environmental	4	Wildtype	Wildtype	Wildtype	PRJNA742769
E556	2018	USA	Wildtype	MAT-1-2	Environmental	1	Wildtype	Wildtype	Wildtype	PRJNA742769
E557	2018	USA	Wildtype	MAT-1-2	Environmental	4	Wildtype	Wildtype	Wildtype	PRJNA742769
E558	2018	USA	Wildtype	MAT-1-1	Environmental	4	Wildtype	Wildtype	Wildtype	PRJNA742769
E559	2018	USA	Wildtype	MAT-1-2	Environmental	4	Wildtype	Wildtype	Wildtype	PRJNA742769
E56	1919	Germany	Wildtype	MAT1-2	Environmental	4	Wildtype	Wildtype	Wildtype
E560	2018	USA	Wildtype	MAT-1-2	Environmental	4	Wildtype	Wildtype	Wildtype	PRJNA742769
E561	2017	USA	Wildtype	MAT-1-1	Environmental	4	Wildtype	Wildtype	Wildtype	PRJNA742769
E562	2017	USA	Wildtype	MAT-1-2	Environmental	4	Wildtype	Wildtype	Wildtype	PRJNA742769
E563	2017	USA	Wildtype	MAT-1-1	Environmental	4	Wildtype	Wildtype	Wildtype	PRJNA742769
E564	2017	USA	Wildtype	MAT-1-1	Environmental	4	Wildtype	Wildtype	Wildtype	PRJNA742769
E565	2017	USA	Wildtype	MAT-1-1	Environmental	4	Wildtype	Wildtype	Wildtype	PRJNA742769
E566	2017	USA	Wildtype	MAT-1-1	Environmental	4	Wildtype	Wildtype	Wildtype	PRJNA742769
E567	2017	USA	Wildtype	MAT-1-1	Environmental	1	Wildtype	Wildtype	Wildtype	PRJNA742769
E568	2017	USA	Wildtype	MAT-1-1	Environmental	4	Wildtype	Wildtype	Wildtype	PRJNA742769
E569	2017	USA	TR46/Y121F/T289A	MAT-1-1	Environmental	4	F219Y	G143A	Wildtype	PRJNA742769
E57	1965	Ecuador	Wildtype	MAT1-2	Environmental	4	Wildtype	Wildtype	Wildtype
E570	2017	USA	Wildtype	MAT-1-2	Environmental	4	Wildtype	Wildtype	Wildtype	PRJNA742769
E571	2017	USA	Wildtype	MAT-1-2	Environmental	4	Wildtype	Wildtype	Wildtype	PRJNA742769
E572	2017	USA	Wildtype	MAT-1-2	Environmental	4	Wildtype	Wildtype	Wildtype	PRJNA742769
E573	2017	USA	Wildtype	MAT-1-1	Environmental	4	Wildtype	Wildtype	Wildtype	PRJNA742769
E574	2017	USA	Wildtype	MAT-1-2	Environmental	4	Wildtype	Wildtype	Wildtype	PRJNA742769
E575	2017	USA	Wildtype	MAT-1-2	Environmental	4	Wildtype	Wildtype	Wildtype	PRJNA742769
E576	2017	USA	Wildtype	MAT-1-1	Environmental	4	Wildtype	Wildtype	Wildtype	PRJNA742769
E577	2017	USA	Wildtype	MAT-1-1	Environmental	5	Wildtype	Wildtype	Wildtype	PRJNA742769
E578	2017	USA	Wildtype	MAT-1-2	Environmental	4	Wildtype	Wildtype	Wildtype	PRJNA742769
E579	2017	USA	Wildtype	MAT-1-1	Environmental	5	Wildtype	Wildtype	Wildtype	PRJNA742769
E58	1984	USA	Wildtype	MAT1-1	Environmental	3	Wildtype	Wildtype	Wildtype
E580	2017	USA	Wildtype	MAT-1-2	Environmental	5	Wildtype	Wildtype	Wildtype	PRJNA742769
E581	2017	USA	Wildtype	MAT-1-1	Environmental	4	Wildtype	Wildtype	Wildtype	PRJNA742769
E582	2017	USA	Wildtype	MAT-1-2	Environmental	4	Wildtype	Wildtype	Wildtype	PRJNA742769
E583	2017	USA	Wildtype	MAT-1-1	Environmental	4	Wildtype	Wildtype	Wildtype	PRJNA742769
E584	2017	USA	Wildtype	MAT-1-1	Environmental	4	Wildtype	Wildtype	Wildtype	PRJNA742769
E585	2017	USA	Wildtype	MAT-1-1	Environmental	4	Wildtype	Wildtype	Wildtype	PRJNA742769
E586	2017	USA	TR46/Y121F/T289A	MAT-1-2	Environmental	3	F219Y	G143A	Wildtype	PRJNA742769
E587	2017	USA	TR46/Y121F/T289A	MAT-1-1	Environmental	4	F219Y	G143A	Wildtype	PRJNA742769
E588	2017	USA	Wildtype	MAT-1-1	Environmental	5	Wildtype	Wildtype	Wildtype	PRJNA742769
E589	2017	USA	Wildtype	MAT-1-2	Environmental	4	Wildtype	Wildtype	Wildtype	PRJNA742769
E59	1967	Ukraine	Wildtype	MAT1-2	Environmental	3	Wildtype	Wildtype	Wildtype
E590	2017	USA	TR46/Y121F/T289A	MAT-1-2	Environmental	3	Wildtype	G143A	H270Y	PRJNA742769
E591	2017	USA	Wildtype	MAT-1-2	Environmental	4	F219Y	Wildtype	Wildtype	PRJNA742769
E593	2017	USA	Wildtype	MAT-1-1	Environmental	4	Wildtype	Wildtype	Wildtype	PRJNA742769
E594	2017	USA	Wildtype	MAT-1-2	Environmental	1	Wildtype	Wildtype	Wildtype	PRJNA742769
E595	2017	USA	TR46	MAT-1-1	Environmental	4	Wildtype	Wildtype	Wildtype	PRJNA742769
E596	2017	USA	Wildtype	MAT-1-2	Environmental	4	Wildtype	Wildtype	Wildtype	PRJNA742769
E597	2017	USA	Wildtype	MAT-1-2	Environmental	4	Wildtype	Wildtype	Wildtype	PRJNA742769
E598	2017	USA	Wildtype	MAT-1-1	Environmental	5	Wildtype	Wildtype	Wildtype	PRJNA742769
E599	2017	USA	Wildtype	MAT-1-2	Environmental	4	Wildtype	Wildtype	Wildtype	PRJNA742769
E6	2011	India	TR34/L98H	MAT1-1	Environmental	3	F219Y	G143A	Wildtype	PRJEB8623
E60	1968	India	Wildtype	MAT1-2	Environmental	4	Wildtype	Wildtype	Wildtype
E600	2017	USA	Wildtype	MAT-1-1	Environmental	4	Wildtype	Wildtype	Wildtype	PRJNA742769
E601	2017	USA	Wildtype	MAT-1-1	Environmental	4	Wildtype	Wildtype	Wildtype	PRJNA742769
E602	2017	USA	Wildtype	MAT-1-2	Environmental	4	Wildtype	Wildtype	Wildtype	PRJNA742769
E603	2017	USA	Wildtype	MAT-1-2	Environmental	4	Wildtype	Wildtype	Wildtype	PRJNA742769
E604	2017	USA	Wildtype	MAT-1-1	Environmental	4	Wildtype	Wildtype	Wildtype	PRJNA742769
E606	2017	USA	Wildtype	MAT-1-1	Environmental	4	Wildtype	Wildtype	Wildtype	PRJNA742769
E607	2017	USA	Wildtype	MAT-1-1	Environmental	4	Wildtype	Wildtype	Wildtype	PRJNA742769
E608	2017	USA	Wildtype	MAT-1-2	Environmental	1	Wildtype	Wildtype	Wildtype	PRJNA742769
E609	2017	USA	Wildtype	MAT-1-2	Environmental	4	Wildtype	Wildtype	Wildtype	PRJNA742769
E61	1967	India	Wildtype	MAT1-1	Environmental	1	Wildtype	Wildtype	Wildtype
E610	2017	USA	Wildtype	MAT-1-1	Environmental	4	Wildtype	Wildtype	Wildtype	PRJNA742769
E611	2017	USA	Wildtype	MAT-1-1	Environmental	4	Wildtype	Wildtype	Wildtype	PRJNA742769
E612	2017	USA	Wildtype	MAT-1-2	Environmental	4	Wildtype	Wildtype	Wildtype	PRJNA742769
E613	2017	USA	Wildtype	MAT-1-2	Environmental	4	Wildtype	Wildtype	Wildtype	PRJNA742769
E614	2017	USA	Wildtype	MAT-1-2	Environmental	3	Wildtype	Wildtype	Wildtype	PRJNA742769
E615	2017	USA	Wildtype	MAT-1-1	Environmental	4	Wildtype	Wildtype	Wildtype	PRJNA742769
E616	2017	USA	Wildtype	MAT-1-1	Environmental	4	Wildtype	Wildtype	Wildtype	PRJNA742769
E617	2017	USA	Wildtype	MAT-1-1	Environmental	4	Wildtype	Wildtype	Wildtype	PRJNA742769
E618	2017	USA	Wildtype	MAT-1-1	Environmental	4	Wildtype	Wildtype	Wildtype	PRJNA742769
E62	1964	Netherlands	Wildtype	MAT1-2	Environmental	3	Wildtype	Wildtype	Wildtype
E620	2017	USA	Wildtype	MAT-1-2	Environmental	4	Wildtype	Wildtype	Wildtype	PRJNA742769
E621	2017	USA	Wildtype	MAT-1-2	Environmental	5	Wildtype	Wildtype	Wildtype	PRJNA742769
E622	2017	USA	Wildtype	MAT-1-2	Environmental	5	Wildtype	Wildtype	Wildtype	PRJNA742769
E623	2017	USA	Wildtype	MAT-1-1	Environmental	5	Wildtype	Wildtype	Wildtype	PRJNA742769
E624	2017	USA	Wildtype	MAT-1-1	Environmental	5	Wildtype	Wildtype	Wildtype	PRJNA742769
E625	2017	USA	Wildtype	MAT-1-1	Environmental	4	Wildtype	Wildtype	Wildtype	PRJNA742769
E626	2017	USA	Wildtype	MAT-1-2	Environmental	4	Wildtype	Wildtype	Wildtype	PRJNA742769
E627	2017	USA	Wildtype	MAT-1-2	Environmental	1	Wildtype	Wildtype	Wildtype	PRJNA742769
E63	1964	Netherlands	Wildtype	MAT1-2	Environmental	3	Wildtype	Wildtype	Wildtype
E64	1964	Netherlands	Wildtype	MAT1-2	Environmental	3	Wildtype	Wildtype	Wildtype
E65	1964	Netherlands	Wildtype	MAT1-1	Environmental	3	Wildtype	Wildtype	Wildtype
E66	1964	Netherlands	Wildtype	MAT1-2	Environmental	3	Wildtype	Wildtype	Wildtype
E67	1964	Netherlands	Wildtype	MAT1-2	Environmental	1	Wildtype	Wildtype	Wildtype
E68	1964	Netherlands	Wildtype	MAT1-1	Environmental	3	Wildtype	Wildtype	Wildtype
E69	1964	Netherlands	Wildtype	MAT1-2	Environmental	3	Wildtype	Wildtype	Wildtype
E7	2011	India	TR34/L98H	MAT1-1	Environmental	3	F219Y	G143A	Wildtype	PRJEB8623
E70	1964	Netherlands	Wildtype	MAT1-1	Environmental	4	Wildtype	Wildtype	Wildtype
E71	1964	Netherlands	Wildtype	MAT1-2	Environmental	3	Wildtype	Wildtype	Wildtype
E72	1964	Netherlands	Wildtype	MAT1-2	Environmental	3	Wildtype	Wildtype	Wildtype
E73	1964	Netherlands	Wildtype	MAT1-1	Environmental	4	Wildtype	Wildtype	Wildtype
E74	1964	France	Wildtype	MAT1-2	Environmental	3	Wildtype	Wildtype	Wildtype
E75	1964	Netherlands	Wildtype	MAT1-2	Environmental	3	Wildtype	Wildtype	Wildtype
E76	1964	Netherlands	Wildtype	MAT1-1	Environmental	4	Wildtype	Wildtype	Wildtype
E77	1964	Netherlands	Wildtype	MAT1-2	Environmental	3	Wildtype	Wildtype	Wildtype
E78	1964	Netherlands	Wildtype	MAT1-2	Environmental	3	Wildtype	Wildtype	Wildtype
E79*		USA	Wildtype	MAT1-1	Environmental	5	Wildtype	Wildtype	Wildtype
E8	2011	India	TR34/L98H	MAT1-1	Environmental	1	F219Y	G143A	Wildtype	PRJEB8623
E80*		USA	Wildtype	MAT1-2	Environmental	4	Wildtype	Wildtype	Wildtype
E81*±	2005	Republic of Ireland	Wildtype	MAT1-1	Environmental	3	Wildtype	Wildtype	Wildtype	PRJEB27135
E82*	2005	Republic of Ireland	Wildtype	MAT1-2	Environmental	3	Wildtype	Wildtype	Wildtype	PRJEB27135
E83*	2005	Republic of Ireland	Wildtype	MAT1-2	Environmental	5	Wildtype	Wildtype	Wildtype	PRJEB27135
E84*±	2005	Republic of Ireland	Wildtype	MAT1-1	Environmental	3	Wildtype	Wildtype	Wildtype	PRJEB27135
E85*	1982	Italy	Wildtype	MAT1-2	Environmental	3	Wildtype	Wildtype	Wildtype
E86*	1983	Thailand	Wildtype	MAT1-2	Environmental	5	Wildtype	Wildtype	Wildtype
E87*	1983	Hungary	Wildtype	MAT-1-2	Environmental	1	Wildtype	Wildtype	Wildtype
E88*	1988	USA	Wildtype	MAT1-2	Environmental	4	Wildtype	Wildtype	Wildtype
E89*	1983	Tunisia	Wildtype	MAT1-1	Environmental	4	Wildtype	Wildtype	Wildtype
E9 ±	2015	UK	TR34/L98H	MAT1-2	Environmental	2	F219Y	Wildtype	Wildtype	PRJEB27135
E90*	1985	Portugal	Wildtype	MAT1-1	Environmental	4	Wildtype	Wildtype	Wildtype
E91*	1977	Hungary	Wildtype	MAT1-1	Environmental	3	Wildtype	Wildtype	Wildtype
E92*	1985	Hungary	Wildtype	MAT1-2	Environmental	4	Wildtype	Wildtype	Wildtype
E93*	1988	USA	Wildtype	MAT1-2	Environmental	4	Wildtype	Wildtype	Wildtype
E94*	1991	Brazil	Wildtype	MAT1-1	Environmental	4	Wildtype	Wildtype	Wildtype
E95*	1985	Japan	Wildtype	MAT-1-2	Environmental	1	Wildtype	Wildtype	Wildtype
E96*	2002	Zimbabwe	Wildtype	MAT1-2	Environmental	3	Wildtype	Wildtype	Wildtype
E97*	2002	Zimbabwe	Wildtype	MAT1-2	Environmental	5	Wildtype	Wildtype	Wildtype
E98*	1997	India	Wildtype	MAT1-2	Environmental	3	Wildtype	Wildtype	Wildtype
E99*	2002	South Africa	Wildtype	MAT1-1	Environmental	5	Wildtype	Wildtype	Wildtype
R1			Wildtype	MAT1-1	Cross		Wildtype	Wildtype	Wildtype	PRJNA947514
R10			Wildtype	MAT1-1	Cross		Wildtype	Wildtype	Wildtype	PRJNA947514
R11			Wildtype	MAT1-2	Cross		Wildtype	Wildtype	Wildtype	PRJNA947514
R12			Wildtype	MAT1-2	Cross		Wildtype	Wildtype	Wildtype	PRJNA947514
R13			Wildtype	MAT1-2	Cross		Wildtype	Wildtype	Wildtype	PRJNA947514
R14			Wildtype	MAT1-1	Cross		Wildtype	Wildtype	Wildtype	PRJNA947514
R15			TR34/L98H	MAT1-1	Cross		Wildtype	Wildtype	Wildtype	PRJNA947515
R16			TR34/L98H	MAT1-2	Cross		Wildtype	Wildtype	Wildtype	PRJNA947515
R17			TR34/L98H	MAT1-1	Cross		Wildtype	Wildtype	Wildtype	PRJNA947515
R18			TR34/L98H	MAT1-2	Cross		Wildtype	Wildtype	Wildtype	PRJNA947515
R19			TR34/L98H	MAT1-2	Cross		Wildtype	Wildtype	Wildtype	PRJNA947515
R20			TR34/L98H	MAT1-1	Cross		Wildtype	Wildtype	Wildtype	PRJNA947515
R21			TR34/L98H	MAT1-1	Cross		Wildtype	Wildtype	Wildtype	PRJNA947515
R22			TR34/L98H	MAT1-2	Cross		Wildtype	Wildtype	Wildtype	PRJNA947515
R23			Wildtype	MAT1-1	Cross		Wildtype	Wildtype	Wildtype	PRJNA947515
R24			Wildtype	MAT1-1	Cross		Wildtype	Wildtype	Wildtype	PRJNA947515
R25			Wildtype	MAT1-2	Cross		Wildtype	Wildtype	Wildtype	PRJNA947515
R26			Wildtype	MAT1-2	Cross		Wildtype	Wildtype	Wildtype	PRJNA947515
R27			Wildtype	MAT1-2	Cross		Wildtype	Wildtype	Wildtype	PRJNA947515
R28			Wildtype	MAT1-2	Cross		Wildtype	Wildtype	Wildtype	PRJNA947515
R29			Wildtype	MAT1-1	Cross		Wildtype	Wildtype	Wildtype	PRJNA947515
R3			Wildtype	MAT1-1	Cross		Wildtype	Wildtype	Wildtype	PRJNA947514
R30			Wildtype	MAT1-1	Cross		Wildtype	Wildtype	Wildtype	PRJNA947515
R4			Wildtype	MAT1-1	Cross		Wildtype	Wildtype	Wildtype	PRJNA947514
R5			Wildtype	MAT1-2	Cross		Wildtype	Wildtype	Wildtype	PRJNA947514
R6			Wildtype	MAT1-2	Cross		Wildtype	Wildtype	Wildtype	PRJNA947514
R7			Wildtype	MAT1-2	Cross		Wildtype	Wildtype	Wildtype	PRJNA947514
R8			Wildtype	MAT1-2	Cross		Wildtype	Wildtype	Wildtype	PRJNA947514
R9			Wildtype	MAT1-1	Cross		Wildtype	Wildtype	Wildtype	PRJNA947514
U1	2010	Republic of Ireland	Wildtype	MAT1-2	Clinical	4	Wildtype	Wildtype	Wildtype	PRJEB27135
U2		Republic of Ireland	Wildtype	MAT1-2	Clinical	4	Wildtype	Wildtype	Wildtype	PRJEB27135
U3	2011	Republic of Ireland	Wildtype	MAT1-2	Clinical	4	Wildtype	Wildtype	Wildtype	PRJEB27135
U4		USA	Wildtype	MAT1-2	Environmental	4	Wildtype	Wildtype	Wildtype
U5		USA	Wildtype	MAT1-2	Environmental	4	Wildtype	Wildtype	Wildtype
X1	2018	UK	Wildtype	MAT1-2	Experimental	4	Wildtype	Wildtype	Wildtype
X2	2018	UK	Wildtype	MAT1-2	Experimental	1	Wildtype	Wildtype	Wildtype
*Indicates isolate used for crossing analysis based on data of Swilaiman et al. (2020)
± indicates isolate used for Bar-seq analysis.
